# Supplementary material
Source: PubMed Central journal article supplement (PMC5150411)
Supplement: pnas.1612244113.sapp.pdf [file pnas.1612244113.sapp.pdf]

## **An oligotrophic deep subsurface community dependent on syntrophy is dominated by sulfur-driven autotrophic denitrifiers**

**Authors:** Maggie C.Y. Lau, Thomas L. Kieft, Olukayode Kuloyo, Borja Linage-Alvarez, Esta van Heerden, Melody R. Lindsay, Cara Magnabosco, Wei Wang, Jessica B. Wiggins, Ling Guo, David H. Perlman, Saw Kyin, Henry H. Shwe, Rachel L. Harris, Youmi Oh, Min Joo Yi, Roland Purtschert, Gregory F. Slater, Shuhei Ono, Siwen Wei, Long Li, Barbara Sherwood Lollar, and Tullis C. Onstott

### **SI Appendix**

This document contains:

SI Materials and Methods

SI Fig. S1 – S5

SI Table S1 – S7

## SI Materials and Methods

**Reverse transcription PCR-cloning.** Total RNA was extracted from a Whatman<sup>TM</sup> polycap 36 TC filter (0.2  $\mu\text{m}$  pore size), which was collected during the same campaign in 2012 July, using the RNA PowerSoil<sup>®</sup> Total RNA Isolation Kit (MO BIO Lab Inc., CA) by following the manufacturer's protocol, except that phenol/chloroform/isoamyl alcohol (25:24:1) solution was pre-warmed to 60°C. DNA was removed using DNase I as described above. A complementary DNA (cDNA) library was constructed from total RNA by following the procedure of the iScript<sup>TM</sup> cDNA Synthesis Kit (Bio-Rad Lab, CA).

PCR was performed targeting 16S rRNA of Archaea and Bacteria, and marker genes of diazotrophs, methanotrophs and methanogens. Archaeal 16S rRNA gene sequences were generated using ARC-109F (5'-ACK GCT CAG TAA CAC GT-3')(1) and ARC-915R (5-GTG CTC CCC CGC CAA TTC CT-3')(2). Bacterial 16S rRNA gene sequences were generated using BAC-S-8Fa (5'-AGR GTT YGA TYM TGG CTC AG-3')(3) and BAC-S-926R (5'-CCG TCA ATT CMT TTR AGT TT-3')(4). *NifH* gene sequences, encoding the subunit H of nitrogenase reductase, were generated using *nifH*\_PolF (5'-TGC GAY CCS AAR GCB GAC TC-3') and *nifH*\_PolR (5-ATS GCC ATC ATY TCR CCG GA-3')(5). *PmoA* gene sequences, encoding the subunit A of particulate methane monooxygenase, were generated using A189m (5'-GGN GAY TGG GAC TTY TGG-3') modified from Holmes *et al.* (6) and A682m\_a (5'-GAA YSC NGA RAA GAA CGM-3') modified from Luesken *et al.* (7). *McrA* gene sequences, encoding subunit A of the methyl coenzyme M, were generated using Mlas (5'-GGT GGT GTM GGD TTC ACM CAR TA-3')(8) and *mcrA*-rev (5'-CGT TCA TBG CGT AGT TVG GRT AGT-3')(9).

A 50  $\mu\text{L}$ -reaction contained cDNA templates plus the following reagents (final concentration): forward and reverse primer (200 nM), Takara PCR Buffer (1X), dNTPs (0.5  $\mu\text{M}$ ), Tween 20 (1/500 vol/vol), Takara *Taq* polymerase (5U/ $\mu\text{L}$ ) and nuclease-free water. All PCR amplification reactions were performed on a C1000 Touch thermal cycler using the following thermal profile: an initial denaturation at 94°C for 5 minutes; followed by 34 cycles of the next 3 steps, 1 minute at 94°C, 1 minute at an annealing temperature of 50°C, and 1 minute at an elongation temperature of 74°C; a final extension at 74°C lasted for 10 minutes. PCR amplifications of the treated RNA yielded no PCR products after 35 cycles, indicating the sample was free from DNA contamination.

Multiple reactions of each gene were pooled to reduce tube-to-tube variation and purified using the Qiagen PCR Purification Kit. The amplicons were then ligated into pGEM-T Easy vectors and finally transformed into competent *E. coli* cells using the Promega Cloning Kit (USA). The competent cells underwent a heat shock at 42° for 45 seconds, and then were incubated overnight at 37°C on LB agar plates containing ampicillin (10 mg mL<sup>-1</sup>). White colonies were picked and screened for inserts using standard M13F and M13R primers by PCR. No clones containing *pmoA* genes were obtained. The final PCR products of expected insert size were sequenced by Sanger sequencing (MacrogenUSA).

1. Nercessian O, Reysenbach A-L, Prieur D, Jeanthon C (2003) Archaeal diversity associated with in situ samplers deployed on hydrothermal vents on the East Pacific Rise (13°N). *Environ Microbiol* 5:492–502.
2. Reysenbach A-L, R N (1994) Reliable amplification of hyperthermophilic archaeal 16S rRNA genes by the polymerase chain reaction. In: *Archaea - A Laboratory Manual: Thermophiles*,

eds Robb FT, Place AR (Cold Spring Harbor Laboratory Press, New York), pp 101–105.

3. Lane DJ (1991) 16S/23S rRNA sequencing. In: *Nucleic Acid Techniques in Bacterial Systematics*, eds Stackebrandt E, Goodfellow M (John Wiley & Sons, Chichester, UK), pp 115–148.
4. Lane DJ et al. (1985) Rapid determination of 16S ribosomal RNA sequences for phylogenetic analyses. *Proc Natl Acad Sci U S A* 83:4972.
5. Poly F, Monrozier LJ, Bally R (2001) Improvement in the RFLP procedure for studying the diversity of *nifH* gene in communities of nitrogen fixers in soil. *Res Microbiol* 152:95–103.
6. Holmes AJ, Costello A, Lidstrom ME, Murrell JC (1995) Evidence that particulate methane monooxygenase and ammonia monooxygenase may be evolutionarily related. *FEMS Microbiol Lett* 132:203–208.
7. Luesken FA et al. (2011) *pmoA* primers for detection of anaerobic methanotrophs. *Appl Environ Microbiol* 77:3877–3880.
8. Luton PE, Wayne JM, Sharp RJ, Riley PW (2002) The *mcrA* gene as an alternative to 16S rRNA in the phylogenetic analysis of methanogen populations in landfill. *Microbiology* 148:3521–3530.
9. Steinberg LM, Regan JM (2008) Phylogenetic comparison of the methanogenic communities from an acidic, oligotrophic fen and an anaerobic digester treating municipal wastewater sludge. *Appl Environ Microbiol* 74:6663–6671.

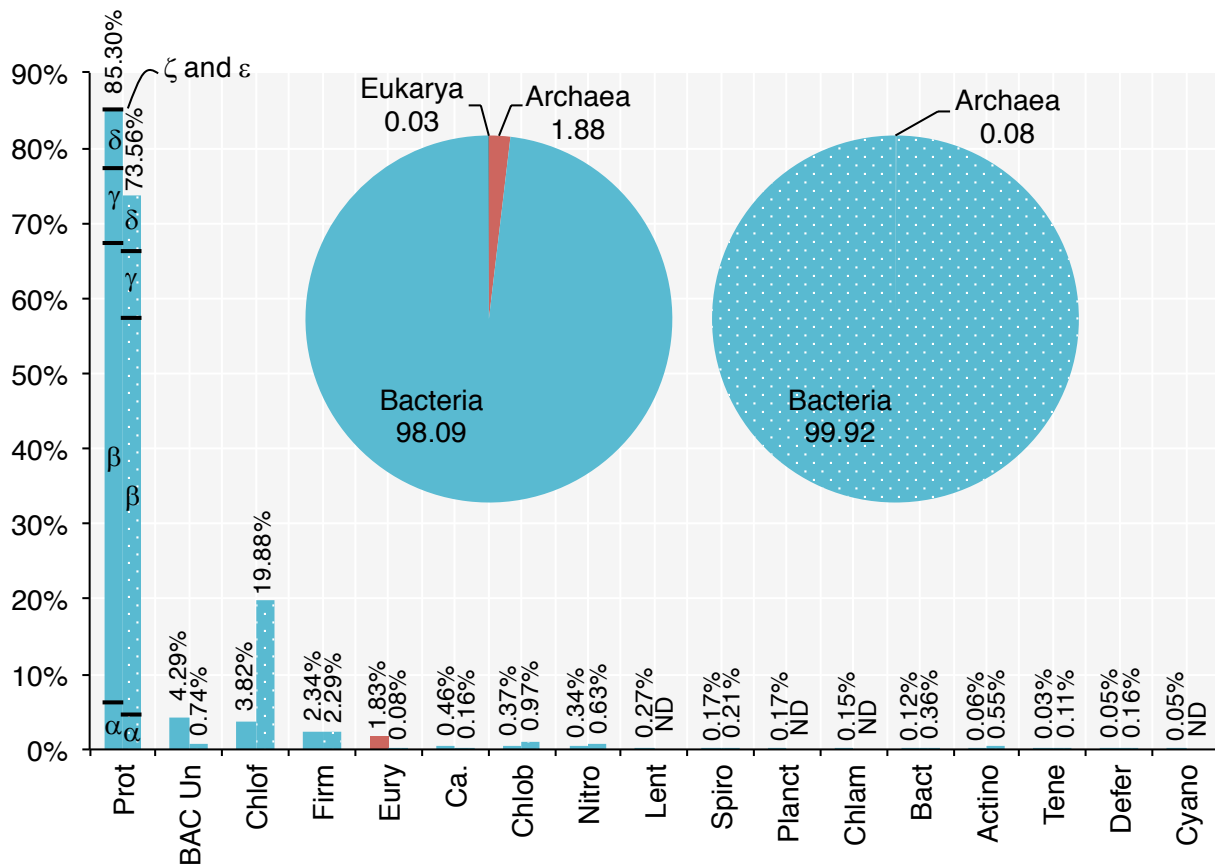

**Fig. S1. Taxonomic compositions revealed by small and large subunits of ribosomal RNA (rRNA) transcripts and ribosomal protein-encoding genes.** Dotted patterns represent ribosomal protein data in the transcriptome. Red indicates Archaea and blue indicates Bacteria. The relative abundances at that domain level are shown in pie charts. In total, 39 phyla were detected but only those showed >0.05% relative abundance are included in the bar graphs, which are arranged in decreasing abundance in the rRNA transcriptome. Abbreviations: Prot, Proteobacteria; BAC Un, unassigned bacteria; Chlof, Chloroflexi; Firm, Firmicutes; Eury, Euryarchaeota; Ca., Candidatus divisions; Chlob, Chlorobi; Nitro, Nitrospirae; Lent, Lentisphaerae; Spiro, Spirochaetae; Planct, Planctomycetes; Chlam, Chlamydiae; Bact, Bacteroidetes; Actino, Actinobacteria; Tene, Tenericutes; Defer, Deferribacteres; Cyano, Cyanobacteria; ND, not detected.

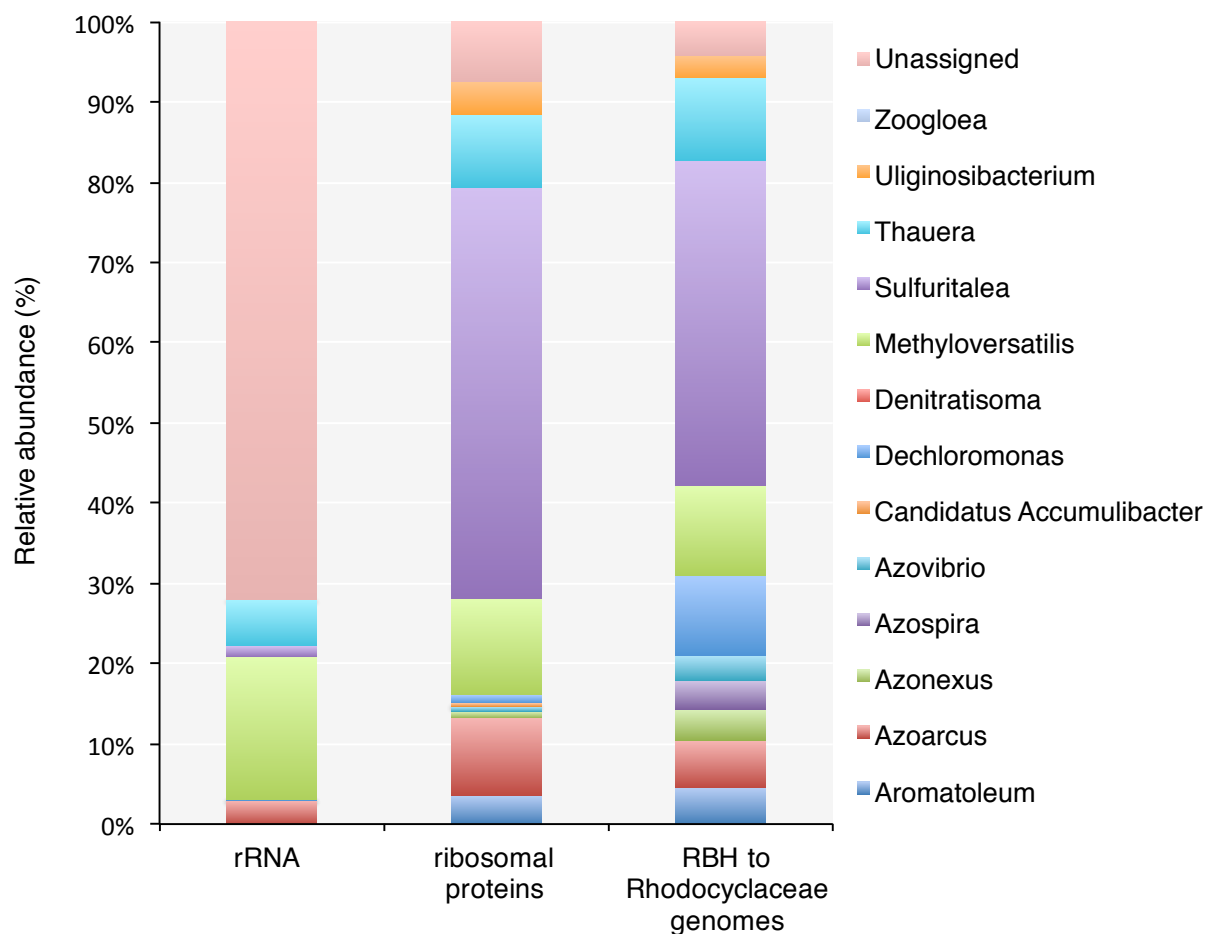

**Fig. S2. Relative abundance of genera within Rhodocyclaceae.** The  $\beta$ -proteobacterial family Rhodocyclaceae dominated the taxonomic profiles as revealed by ribosomal RNA (rRNA) and ribosomal protein encoding genes (PEGs) (25.7% and 39.4%, respectively). The relative distributions of its genera were further examined using reciprocal best-hit (RBH) BLAST approach between all PEG transcripts assembled in this study and 21 published genomes downloaded from NCBI.

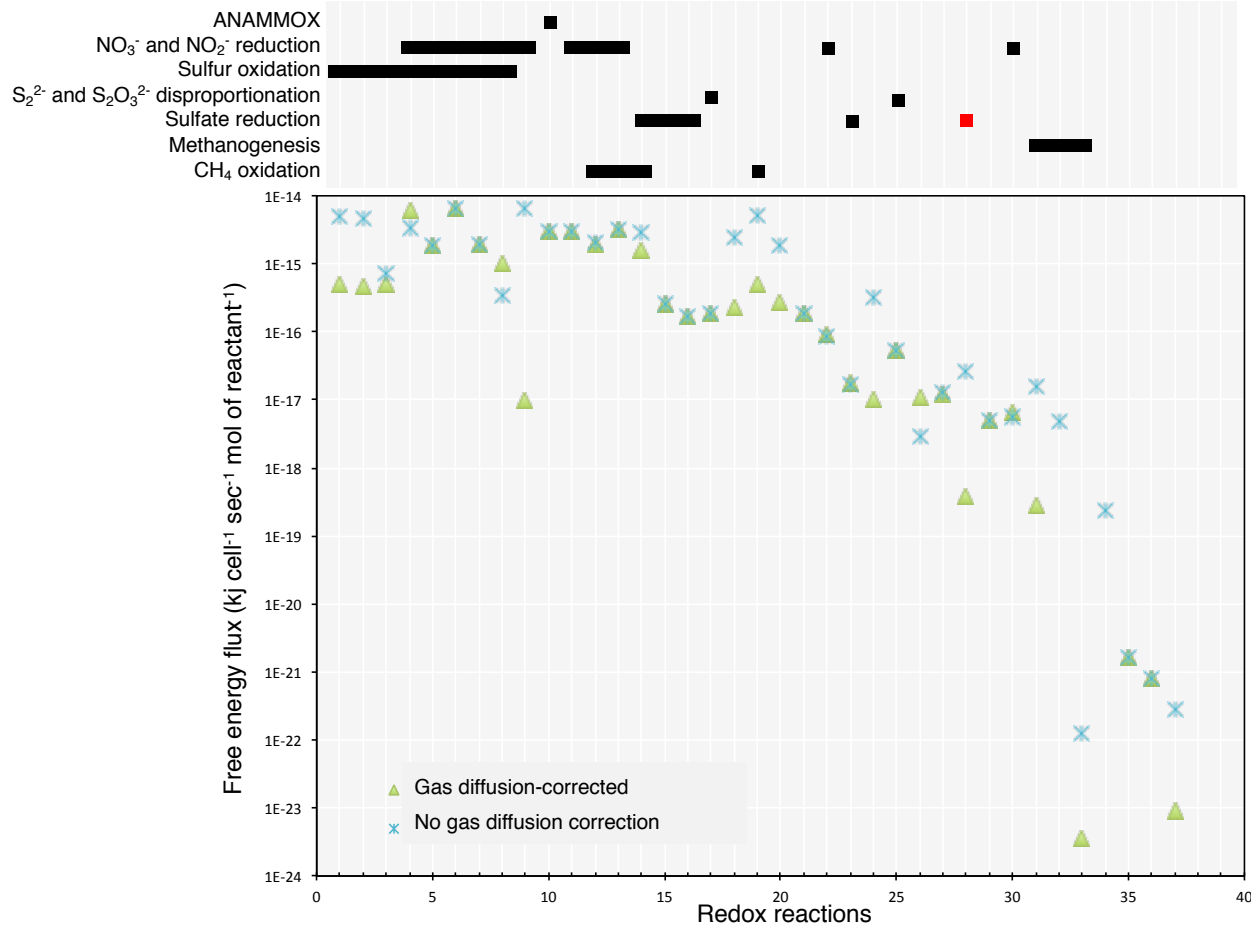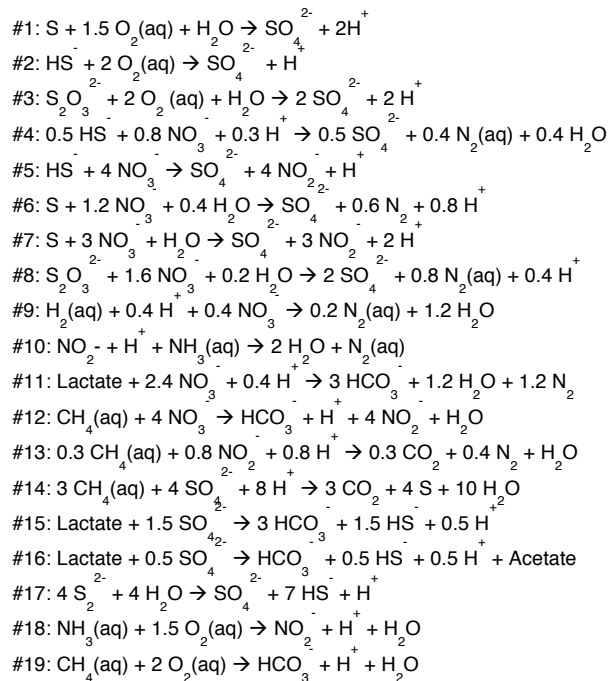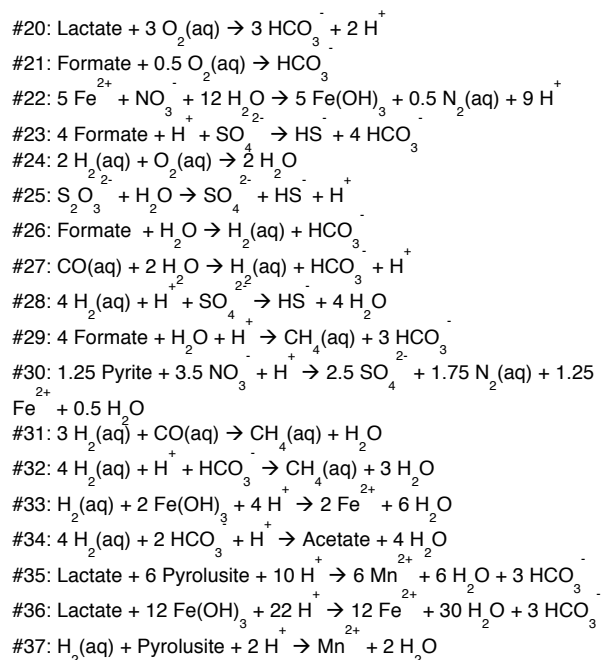

**Fig. S3. Free energy fluxes estimated from the fluid chemistry for both the measured concentrations and for the diffusion-corrected gas concentrations.**

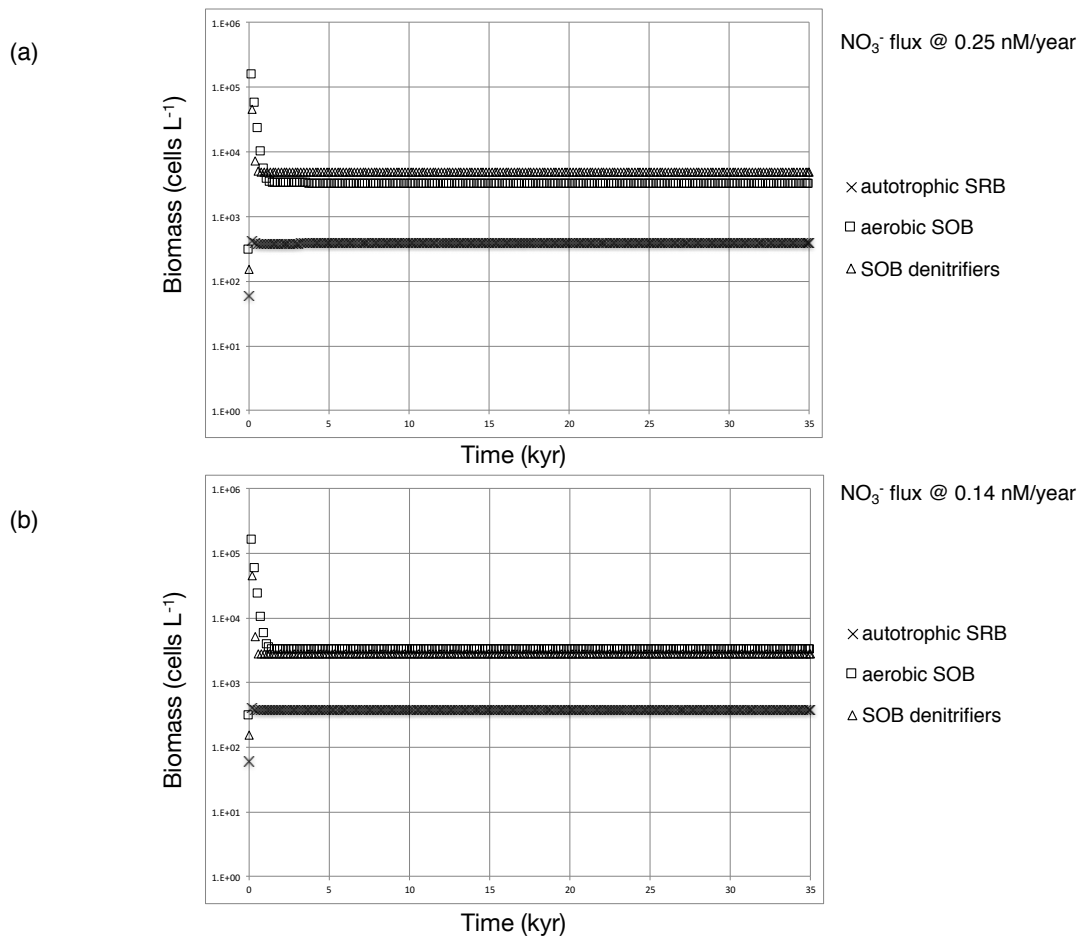

**Fig. S4. Simulated cell concentrations of sulfate reducers (SRB) and sulfate oxidizers (SOB) over 35,000 years.** Using the parameters in Table S1, the groundwater chemistry of BE326 Bh2 and the fluxes of  $\text{H}_2$ ,  $\text{SO}_4^{2-}$ ,  $\text{O}_2$  and  $\text{NO}_3^-$ , the cellular abundance (converted from mg/kg output from GWB) of the autotrophic SRB, aerobic SOB and SOB denitrifiers were simulated for different  $\text{NO}_3^-$  fluxes (high in (a) and low in (b)). SOB are about an order of magnitude more abundant than autotrophic SRB. The abundance of the SOB relative to that of the autotrophic SRB is governed by the flux of  $\text{NO}_3^-$  relative to  $\text{H}_2$  ( $0.6 \text{ nM yr}^{-1}$  for  $\text{H}_2$ ). The abundance of the SOB denitrifiers relative to that of the aerobic SOB is governed by  $\text{NO}_3^-$  fluxes, with the SOB denitrifiers being more abundant than the aerobic SOB at higher  $\text{NO}_3^-$  flux.

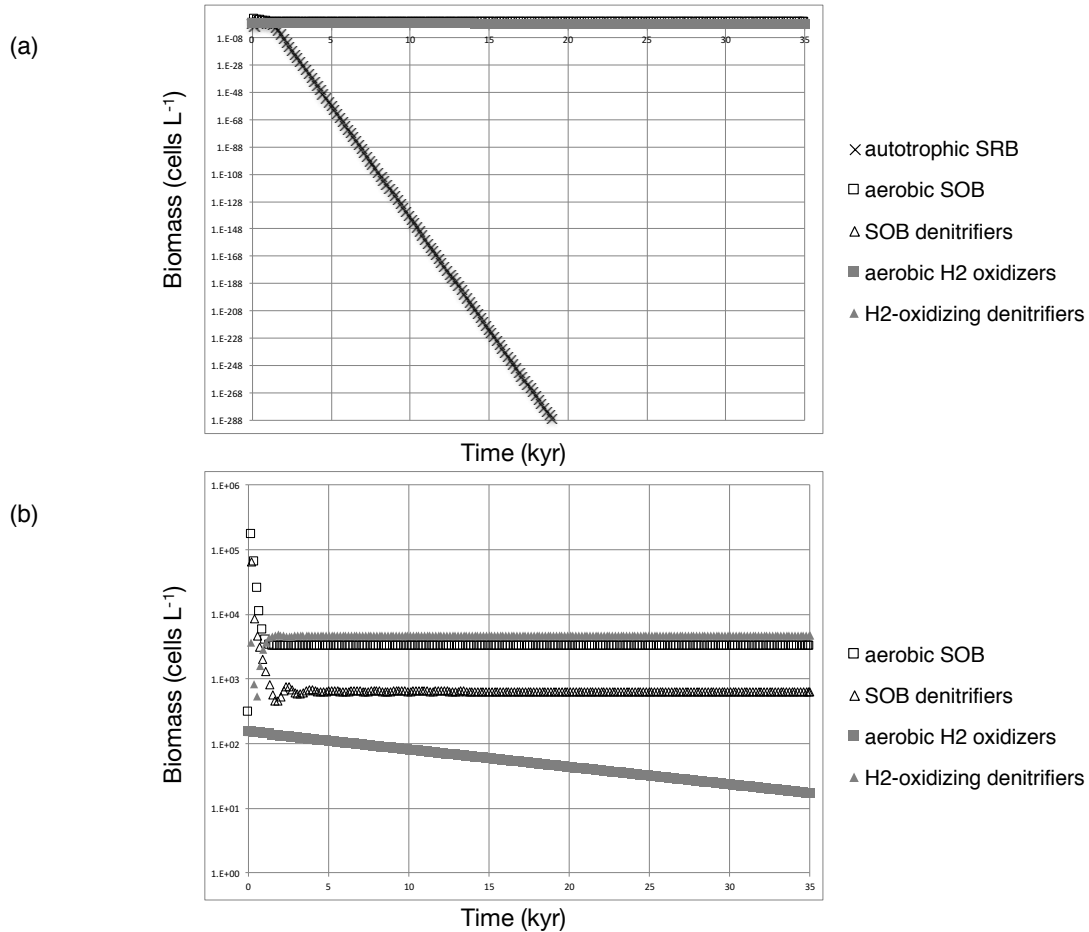

**Fig. S5. Simulated cell concentrations of sulfate reducers (SRB), sulfate oxidizers (SOB) and H<sub>2</sub>-oxidizers 35,000 years.** Using the parameters in Table S1, the groundwater chemistry of BE326 Bh2 and the fluxes of H<sub>2</sub>, SO<sub>4</sub><sup>2-</sup>, O<sub>2</sub> and NO<sub>3</sub><sup>-</sup>, the cellular abundance (converted from mg/kg output from GWB) of the autotrophic SRB, aerobic SOB and SOB denitrifiers, aerobic H<sub>2</sub> oxidizers and H<sub>2</sub>-oxidizing denitrifiers were simulated for the same condition as for Fig. S4a. In this simulation, the populations of autotrophic SRB (a) and the aerobic H<sub>2</sub> oxidizers (b) decline over time, with the former declines more quickly. Whereas, the abundance of H<sub>2</sub>-oxidizing denitrifiers is higher than aerobic SOB, which is more abundant than SOB denitrifiers.



Table S1. Metadata of the crustal fluids of BE326 borehole 2 collected during 2012 July.

|                                                                                          |                                          |                       |
|------------------------------------------------------------------------------------------|------------------------------------------|-----------------------|
| Temperature*                                                                             | 38.1 °C                                  |                       |
| pH*                                                                                      | 8.6                                      |                       |
| pe*                                                                                      | -1.4                                     |                       |
| TDS*                                                                                     | 3.59 g L <sup>-1</sup>                   |                       |
| O <sub>2</sub>                                                                           | 0.46 μM                                  | 4.2 μM <sup>#</sup>   |
| N <sub>2</sub>                                                                           | 0.5 mM                                   | 4.1 mM <sup>#</sup>   |
| N <sub>2</sub> O <sup>@</sup>                                                            | 3.7 μM                                   | 22 μM <sup>#</sup>    |
| H <sub>2</sub>                                                                           | 8.9 nM                                   | 230 nM <sup>#</sup>   |
| CO                                                                                       | 88.7 nM                                  | 7.8 μM <sup>#</sup>   |
| CH <sub>4</sub>                                                                          | 1.3 mM                                   | 8.1 mM <sup>#</sup>   |
| <sup>3</sup> He                                                                          | 4.2 pM                                   | 0.3 nM <sup>#</sup>   |
| <sup>4</sup> He                                                                          | 103 μM                                   | 6.2 mM <sup>#</sup>   |
| <sup>36</sup> Ar                                                                         | 3.8 nM                                   | 48.0 nM <sup>#</sup>  |
| <sup>40</sup> Ar                                                                         | 12.0 μM                                  | 148.0 μM <sup>#</sup> |
| <sup>81</sup> Kr                                                                         | 0.3 nM                                   | 1.7 nM <sup>#</sup>   |
| <sup>129</sup> Xe                                                                        | 16.0 pM                                  | 103.0 pM <sup>#</sup> |
| <sup>134</sup> Xe                                                                        | 6.3 pM                                   | 40.0 pM <sup>#</sup>  |
| <sup>136</sup> Xe                                                                        | 5.7 pM                                   | 37.0 pM <sup>#</sup>  |
| DOC*                                                                                     | 28.8 μM                                  |                       |
| DIC*                                                                                     | 330 μM                                   |                       |
| Formate                                                                                  | 0.44 μM                                  |                       |
| Acetate                                                                                  | <0.7 μM                                  |                       |
| Lactate                                                                                  | 1.0 μM                                   |                       |
| Na <sup>+</sup> *                                                                        | 48.2 mM                                  |                       |
| K <sup>+</sup> *                                                                         | 0.9 mM                                   |                       |
| Mg <sup>2+</sup> *                                                                       | 0.03 μM                                  |                       |
| Ca <sup>2+</sup> *                                                                       | 3.88 mM                                  |                       |
| Sr <sup>2+</sup> *                                                                       | 73.4 μM                                  |                       |
| Ba <sup>2+</sup> *                                                                       | 10.1 μM                                  |                       |
| Si <sup>4+</sup> *                                                                       | 0.4 μM                                   |                       |
| Mn <sup>2+</sup> *                                                                       | 5.6 μM                                   |                       |
| Fe <sup>2+</sup> *                                                                       | 0.6 μM                                   |                       |
| F <sup>-</sup> *                                                                         | 0.1 μM                                   |                       |
| Cl <sup>-</sup> *                                                                        | 61.5 mM                                  |                       |
| Br <sup>-</sup> *                                                                        | 0.1 mM                                   |                       |
| SO <sub>4</sub> <sup>2-</sup> *                                                          | 623 μM <sup>^</sup>                      |                       |
| HS <sup>-</sup>                                                                          | 14.7 μM                                  | 14.9 μM <sup>#</sup>  |
| Total S                                                                                  | 493 μM                                   |                       |
| TN*                                                                                      | 47.1 μM                                  |                       |
| NO <sub>3</sub> <sup>-</sup> *                                                           | 3 μM                                     |                       |
| NO <sub>2</sub> <sup>-</sup> *                                                           | <2 μM                                    |                       |
| NH <sub>4</sub> <sup>+</sup> *                                                           | 46.6 μM                                  | 230 μM <sup>#</sup>   |
| δ <sup>18</sup> O-H <sub>2</sub> O*                                                      | -8.68 ‰                                  |                       |
| δ <sup>2</sup> H-H <sub>2</sub> O*                                                       | -47 ‰                                    |                       |
| δ <sup>13</sup> C-CH <sub>4</sub> *                                                      | -53.8 ‰                                  |                       |
| δ <sup>2</sup> H-CH <sub>4</sub> *                                                       | -185 ‰                                   |                       |
| δ <sup>13</sup> C-CO <sub>2</sub> *                                                      | -42.6 ‰                                  |                       |
| Δ <sup>14</sup> C-CO <sub>2</sub> *                                                      | -914.8±0.8 ‰                             |                       |
| δ <sup>13</sup> C-DOC*                                                                   | -28±0.5 ‰                                |                       |
| Δ <sup>13</sup> C-DOC <sup>@</sup>                                                       | -493.6±1.7 ‰                             |                       |
| δ <sup>13</sup> C-PLFA*                                                                  | -54.84 ‰                                 |                       |
| Δ <sup>13</sup> C-PLFA*                                                                  | -886.8±8.4 ‰                             |                       |
| δ <sup>34</sup> S-HS <sup>-</sup>                                                        | 5.9 ‰                                    |                       |
| δ <sup>34</sup> S-SO <sub>4</sub> <sup>2-</sup>                                          | 4.5 ‰                                    |                       |
| δ <sup>15</sup> N-NO <sub>3</sub> <sup>-</sup> @                                         | 36.3±0.1 ‰                               |                       |
| δ <sup>18</sup> O-NO <sub>3</sub> <sup>-</sup> @                                         | 49.2±0.5 ‰                               |                       |
| subsurface residence time from <sup>40</sup> Ar, <sup>134</sup> Xe and <sup>136</sup> Xe | 3-14 myr                                 |                       |
| subsurface residence time for DIC                                                        | 40-80 kyr                                |                       |
| cell concentration (direct count and PLFA conversion)*                                   | 10 <sup>3-4</sup> cells mL <sup>-1</sup> |                       |

Notes:

\*Data assembled from Lau et al. (2014) and Simkus et al. (2016). Full citation can be found in the main article.

@Data from 2011 sample as the 2012 sample was not analyzed

#Gas concentrations corrected for diffusive loss following Lippmann et al. (2003). See Online Methods.

^ corrected the mistake in Lau et al. (2014)

Abbreviations: TDS, total dissolved solid; DOC, dissolved organic carbon; DIC, dissolved inorganic carbon; PLFA, phospholipid fatty acids

**Table S2. Summary of *de novo* metatranscriptomic assemblies of non-coding and coding RNA reads generated by Trans-ABYSS and Trinity, respectively.**

|                                       | coding RNA (1,498,563 reads) | non-coding RNA (20,078,828 reads) |
|---------------------------------------|------------------------------|-----------------------------------|
| Assembler                             | Trinity                      | Trans-ABYSS                       |
| Total number of transcripts           | 14,678                       | 12,783                            |
| Total assembled length (nt)           | 5,056,527                    | 4,922,139                         |
| Max transcript length (nt)            | 2,942                        | 3,123                             |
| Min transcript length (nt)            | 201                          | 200                               |
| Average transcript length (nt)        | 344                          | 385                               |
| N50 transcript length (nt)            | 337                          | 397                               |
| Number of transcripts longer than N50 | 4,574                        | 3,560                             |
| N90 transcript length (nt)            | 218                          | 223                               |
| Number of transcripts longer than N90 | 12,258                       | 10,449                            |
| Mapping rate                          | 54.00%                       | 98.20%                            |

**Table S3. Summary of protein-encoding genes (PEGs) identified as Rhodocyclaceae by the reciprocal best-hits BLAST approach against 21 published Rhodocyclaceae genomes.**

| Species                | Annotation of PEGs                                                      | Coverage |
|------------------------|-------------------------------------------------------------------------|----------|
| Aromatoleum aromaticum | 1,4-alpha-glucan branching protein                                      | 4        |
| Aromatoleum aromaticum | 3-dehydroquininate dehydratase                                          | 4        |
| Aromatoleum aromaticum | 3-deoxy-D-manno-octulosonate 8-phosphate phosphatase                    | 2        |
| Aromatoleum aromaticum | 30S ribosomal protein S2                                                | 29       |
| Aromatoleum aromaticum | 4-alpha-glucanotransferase                                              | 9        |
| Aromatoleum aromaticum | ABC transporter                                                         | 5        |
| Aromatoleum aromaticum | ABC transporter permease                                                | 4        |
| Aromatoleum aromaticum | acetolactate synthase small subunit                                     | 5        |
| Aromatoleum aromaticum | aconitate hydratase                                                     | 1        |
| Aromatoleum aromaticum | alpha-amylase                                                           | 2        |
| Aromatoleum aromaticum | apolipoprotein N-acyltransferase                                        | 4        |
| Aromatoleum aromaticum | ATP-dependent exonuclease                                               | 5        |
| Aromatoleum aromaticum | ATP-dependent protease ATPase subunit HsIU                              | 7        |
| Aromatoleum aromaticum | bacterioferritin                                                        | 9        |
| Aromatoleum aromaticum | butyryl-CoA dehydrogenase                                               | 8        |
| Aromatoleum aromaticum | catalase                                                                | 6        |
| Aromatoleum aromaticum | chemotaxis protein CheR                                                 | 4        |
| Aromatoleum aromaticum | chorismate synthase                                                     | 15       |
| Aromatoleum aromaticum | chromosome condensation regulator RCC1                                  | 5        |
| Aromatoleum aromaticum | DDE endonuclease                                                        | 5        |
| Aromatoleum aromaticum | dehydrogenase                                                           | 3        |
| Aromatoleum aromaticum | diaminopimelate decarboxylase                                           | 14       |
| Aromatoleum aromaticum | DNA polymerase subunit beta                                             | 10       |
| Aromatoleum aromaticum | DNA topoisomerase IV subunit B                                          | 3        |
| Aromatoleum aromaticum | exopolysaccharide export protein                                        | 2        |
| Aromatoleum aromaticum | FAD-linked oxidase                                                      | 3        |
| Aromatoleum aromaticum | fimbrial protein                                                        | 457      |
| Aromatoleum aromaticum | gamma-glutamyl-phosphate reductase                                      | 9        |
| Aromatoleum aromaticum | glucosylglycerol-phosphate synthase                                     | 2        |
| Aromatoleum aromaticum | glycogen debranching enzyme                                             | 18       |
| Aromatoleum aromaticum | glycogen-branching enzyme                                               | 3        |
| Aromatoleum aromaticum | GreA/GreB family elongation factor                                      | 8        |
| Aromatoleum aromaticum | heat-shock protein Hsp20                                                | 33       |
| Aromatoleum aromaticum | hypothetical protein                                                    | 244      |
| Aromatoleum aromaticum | iron-sulfur-binding protein                                             | 5        |
| Aromatoleum aromaticum | malate synthase G                                                       | 2        |
| Aromatoleum aromaticum | mechanosensitive ion channel protein MscS                               | 3        |
| Aromatoleum aromaticum | methylmalonyl-CoA mutase                                                | 5        |
| Aromatoleum aromaticum | molybdenum protein large subunit                                        | 21       |
| Aromatoleum aromaticum | NAD(P)H dehydrogenase (quinone)                                         | 6        |
| Aromatoleum aromaticum | NADH:ubiquinone oxidoreductase subunit N                                | 2        |
| Aromatoleum aromaticum | nitric oxide synthase                                                   | 4        |
| Aromatoleum aromaticum | peptidase                                                               | 8        |
| Aromatoleum aromaticum | phenylacetate--CoA ligase                                               | 5        |
| Aromatoleum aromaticum | phosphatidylethanolamine N-methyltransferase                            | 4        |
| Aromatoleum aromaticum | pyruvate dehydrogenase (acetyl-transferring) E1 component subunit alpha | 2        |
| Aromatoleum aromaticum | regulator                                                               | 10       |
| Aromatoleum aromaticum | rubredoxin                                                              | 6        |
| Aromatoleum aromaticum | sodium-independent anion transporter                                    | 3        |
| Aromatoleum aromaticum | sugar ABC transporter substrate-binding protein                         | 32       |
| Aromatoleum aromaticum | transcriptional regulator                                               | 11       |
| Aromatoleum aromaticum | transporter                                                             | 0        |
| Aromatoleum aromaticum | transposase                                                             | 10       |
| Aromatoleum aromaticum | tRNA pseudouridine synthase B                                           | 3        |
| Aromatoleum aromaticum | tryptophan synthase subunit beta                                        | 14       |
| Aromatoleum aromaticum | two-component sensor histidine kinase                                   | 1        |
| Aromatoleum aromaticum | two-component system response regulator                                 | 8        |
| Aromatoleum aromaticum | type II secretion system protein GspG                                   | 5        |
| Aromatoleum aromaticum | ubiquinone-binding protein                                              | 6        |
| Aromatoleum aromaticum | uroporphyrinogen decarboxylase                                          | 10       |
| Aromatoleum aromaticum | zinc finger protein                                                     | 2        |
| Azoarcus               | MULTISPECIES: NADH-quinone oxidoreductase subunit K                     | 17       |
| Azoarcus sp. PA01      | 2-nitropropane dioxygenase                                              | 11       |
| Azoarcus sp. PA01      | 2-oxoacid:ferredoxin oxidoreductase subunit beta                        | 2        |
| Azoarcus sp. PA01      | 2-oxoisovalerate dehydrogenase                                          | 13       |
| Azoarcus sp. PA01      | 23S rRNA (adenine(2503)-C(2))-methyltransferase                         | 8        |
| Azoarcus sp. PA01      | 50S ribosomal protein L32                                               | 17       |
| Azoarcus sp. PA01      | 7-cyano-7-deazaguanine synthase                                         | 1        |
| Azoarcus sp. PA01      | aspartate aminotransferase                                              | 1        |
| Azoarcus sp. PA01      | benzoyl-CoA-dihydrodiol lyase                                           | 4        |

|                        |                                                                            |    |
|------------------------|----------------------------------------------------------------------------|----|
| Azoarcus sp. PA01      | beta-ketoacyl-ACP reductase                                                | 6  |
| Azoarcus sp. PA01      | cation transporter                                                         | 10 |
| Azoarcus sp. PA01      | CDP-diacylglycerol--serine O-phosphatidyltransferase                       | 6  |
| Azoarcus sp. PA01      | cysteine desulfurase                                                       | 6  |
| Azoarcus sp. PA01      | cytochrome C                                                               | 3  |
| Azoarcus sp. PA01      | dihydroorotate dehydrogenase 2                                             | 2  |
| Azoarcus sp. PA01      | dihydroxy-acid dehydratase                                                 | 2  |
| Azoarcus sp. PA01      | DNA helicase                                                               | 2  |
| Azoarcus sp. PA01      | DNA recombination protein RecO                                             | 3  |
| Azoarcus sp. PA01      | DNA repair protein                                                         | 9  |
| Azoarcus sp. PA01      | DNA topoisomerase                                                          | 2  |
| Azoarcus sp. PA01      | DNA-(apurinic or apyrimidinic site) lyase                                  | 3  |
| Azoarcus sp. PA01      | DNA-binding response regulator                                             | 4  |
| Azoarcus sp. PA01      | glucokinase                                                                | 1  |
| Azoarcus sp. PA01      | glutaredoxin                                                               | 3  |
| Azoarcus sp. PA01      | glycine cleavage system protein T                                          | 10 |
| Azoarcus sp. PA01      | GntR family transcriptional regulator                                      | 6  |
| Azoarcus sp. PA01      | GTPase                                                                     | 3  |
| Azoarcus sp. PA01      | heat-shock protein Hsp20                                                   | 3  |
| Azoarcus sp. PA01      | hemin receptor                                                             | 10 |
| Azoarcus sp. PA01      | hypothetical protein                                                       | 94 |
| Azoarcus sp. PA01      | LysR family transcriptional regulator                                      | 5  |
| Azoarcus sp. PA01      | NADH dehydrogenase                                                         | 22 |
| Azoarcus sp. PA01      | panetheine-phosphate adenyltransferase                                     | 13 |
| Azoarcus sp. PA01      | peptidase M50                                                              | 1  |
| Azoarcus sp. PA01      | peptide-methionine (S)-S-oxide reductase                                   | 4  |
| Azoarcus sp. PA01      | phenylphosphate synthase subunit beta                                      | 13 |
| Azoarcus sp. PA01      | phosphate ABC transporter permease                                         | 9  |
| Azoarcus sp. PA01      | phosphatidylserine decarboxylase                                           | 10 |
| Azoarcus sp. PA01      | pilin                                                                      | 13 |
| Azoarcus sp. PA01      | potassium transporter                                                      | 3  |
| Azoarcus sp. PA01      | protein nirG                                                               | 5  |
| Azoarcus sp. PA01      | quinone oxidoreductase                                                     | 1  |
| Azoarcus sp. PA01      | ribosome-binding factor A                                                  | 2  |
| Azoarcus sp. PA01      | RNA helicase                                                               | 2  |
| Azoarcus sp. PA01      | shikimate kinase                                                           | 10 |
| Azoarcus sp. PA01      | siderophore-interacting protein                                            | 9  |
| Azoarcus sp. PA01      | sterol-binding protein                                                     | 7  |
| Azoarcus sp. PA01      | thioredoxin reductase                                                      | 2  |
| Azoarcus sp. PA01      | transcription elongation factor NusA                                       | 29 |
| Azoarcus sp. PA01      | UDP-N-acetylmuramate:L-alanyl-gamma-D-glutamyl-meso-diaminopimelate ligase | 6  |
| Azoarcus sp. PA01      | universal stress protein                                                   | 6  |
| Azoarcus sp. PA01      | Xaa-Pro aminopeptidase                                                     | 2  |
| Azoarcus sp. PA01      | Zn-dependent hydrolase                                                     | 5  |
| Azoarcus toluclasticus | 2-alkenal reductase                                                        | 6  |
| Azoarcus toluclasticus | 3-ketoacyl-CoA thiolase                                                    | 14 |
| Azoarcus toluclasticus | 30S ribosomal protein S15                                                  | 3  |
| Azoarcus toluclasticus | 50S ribosomal protein L29                                                  | 6  |
| Azoarcus toluclasticus | 50S rRNA methyltransferase                                                 | 8  |
| Azoarcus toluclasticus | ABC transporter ATP-binding protein                                        | 6  |
| Azoarcus toluclasticus | ABC transporter permease                                                   | 7  |
| Azoarcus toluclasticus | adenylate kinase                                                           | 12 |
| Azoarcus toluclasticus | ADP-ribose pyrophosphatase                                                 | 3  |
| Azoarcus toluclasticus | aldehyde dehydrogenase                                                     | 2  |
| Azoarcus toluclasticus | aminotransferase                                                           | 3  |
| Azoarcus toluclasticus | antitoxin                                                                  | 6  |
| Azoarcus toluclasticus | aromatic hydrocarbon degradation protein                                   | 3  |
| Azoarcus toluclasticus | arsenical pump-driving ATPase                                              | 1  |
| Azoarcus toluclasticus | aspartate aminotransferase                                                 | 8  |
| Azoarcus toluclasticus | ATP synthase F0F1 subunit epsilon                                          | 43 |
| Azoarcus toluclasticus | ATP synthase subunit alpha                                                 | 34 |
| Azoarcus toluclasticus | ATP-dependent protease subunit HslV                                        | 4  |
| Azoarcus toluclasticus | bacterioferritin                                                           | 9  |
| Azoarcus toluclasticus | BAX inhibitor protein                                                      | 7  |
| Azoarcus toluclasticus | branched-chain alpha-keto acid dehydrogenase subunit E2                    | 13 |
| Azoarcus toluclasticus | branched-chain amino acid ABC transporter substrate-binding protein        | 3  |
| Azoarcus toluclasticus | cell division protein FtsX                                                 | 4  |
| Azoarcus toluclasticus | cytochrome C                                                               | 87 |
| Azoarcus toluclasticus | cytochrome c class I                                                       | 8  |
| Azoarcus toluclasticus | DNA polymerase beta                                                        | 8  |
| Azoarcus toluclasticus | ferredoxin oxidoreductase                                                  | 4  |
| Azoarcus toluclasticus | flagellar motor protein                                                    | 2  |
| Azoarcus toluclasticus | glycine dehydrogenase (aminomethyl-transferring)                           | 7  |
| Azoarcus toluclasticus | GTP-binding protein                                                        | 10 |

|                        |                                                                                                 |     |
|------------------------|-------------------------------------------------------------------------------------------------|-----|
| Azoarcus toluclasticus | heat-shock protein Hsp20                                                                        | 7   |
| Azoarcus toluclasticus | histidine triad (HIT) protein                                                                   | 2   |
| Azoarcus toluclasticus | hybrid sensor histidine kinase/response regulator                                               | 3   |
| Azoarcus toluclasticus | hypothetical protein                                                                            | 496 |
| Azoarcus toluclasticus | hypothetical protein, partial                                                                   | 12  |
| Azoarcus toluclasticus | lipid II flippase MurJ                                                                          | 1   |
| Azoarcus toluclasticus | lysine--tRNA ligase                                                                             | 3   |
| Azoarcus toluclasticus | membrane protein                                                                                | 4   |
| Azoarcus toluclasticus | metal-dependent phosphohydrolase                                                                | 9   |
| Azoarcus toluclasticus | methionyl-tRNA formyltransferase                                                                | 2   |
| Azoarcus toluclasticus | molybdopterin molybdenumtransferase MoeA                                                        | 7   |
| Azoarcus toluclasticus | molybdopterin oxidoreductase                                                                    | 6   |
| Azoarcus toluclasticus | mRNA interferase MqsR                                                                           | 8   |
| Azoarcus toluclasticus | N-acetylglucosaminyl transferase                                                                | 2   |
| Azoarcus toluclasticus | NADH dehydrogenase subunit D                                                                    | 1   |
| Azoarcus toluclasticus | nicotinate-nucleotide--dimethylbenzimidazole phosphoribosyltransferase                          | 3   |
| Azoarcus toluclasticus | nitroreductase family protein                                                                   | 4   |
| Azoarcus toluclasticus | PAS domain-containing sensor histidine kinase                                                   | 3   |
| Azoarcus toluclasticus | patatin                                                                                         | 3   |
| Azoarcus toluclasticus | peptidase S11                                                                                   | 2   |
| Azoarcus toluclasticus | peptidoglycan-binding protein                                                                   | 23  |
| Azoarcus toluclasticus | phenylacetaldehyde dehydrogenase                                                                | 3   |
| Azoarcus toluclasticus | poly(3-hydroxyalkanoate) synthetase                                                             | 1   |
| Azoarcus toluclasticus | precorrin-3B C(17)-methyltransferase                                                            | 4   |
| Azoarcus toluclasticus | preprotein translocase subunit YajC                                                             | 14  |
| Azoarcus toluclasticus | pyridine nucleotide-disulfide oxidoreductase                                                    | 15  |
| Azoarcus toluclasticus | pyruvate carboxylase                                                                            | 9   |
| Azoarcus toluclasticus | ribonuclease PH                                                                                 | 5   |
| Azoarcus toluclasticus | RNA helicase                                                                                    | 8   |
| Azoarcus toluclasticus | secretin                                                                                        | 7   |
| Azoarcus toluclasticus | sodium:calcium antiporter                                                                       | 30  |
| Azoarcus toluclasticus | succinyl-CoA synthetase subunit alpha                                                           | 4   |
| Azoarcus toluclasticus | transcription elongation factor GreB                                                            | 2   |
| Azoarcus toluclasticus | transcriptional regulator                                                                       | 3   |
| Azoarcus toluclasticus | transposase                                                                                     | 6   |
| Azoarcus toluclasticus | tRNA threonylcarbamoyladenine biosynthesis protein TsaE                                         | 2   |
| Azoarcus toluclasticus | two-component system response regulator                                                         | 4   |
| Azoarcus toluclasticus | UDP-glucose 6-dehydrogenase                                                                     | 3   |
| Azonexus hydrophilus   | 2-aminoethylphosphonate--pyruvate transaminase                                                  | 2   |
| Azonexus hydrophilus   | 3-hydroxyacyl-CoA dehydrogenase                                                                 | 7   |
| Azonexus hydrophilus   | 30S ribosomal protein S15                                                                       | 1   |
| Azonexus hydrophilus   | 30S ribosomal protein S3                                                                        | 7   |
| Azonexus hydrophilus   | 4-hydroxybenzoate octaprenyltransferase                                                         | 20  |
| Azonexus hydrophilus   | 5'-nucleotidase                                                                                 | 2   |
| Azonexus hydrophilus   | 50S ribosomal protein L33                                                                       | 9   |
| Azonexus hydrophilus   | ABC transporter ATP-binding protein                                                             | 5   |
| Azonexus hydrophilus   | ABC transporter permease                                                                        | 5   |
| Azonexus hydrophilus   | ABC transporter substrate-binding protein                                                       | 5   |
| Azonexus hydrophilus   | acetate kinase                                                                                  | 2   |
| Azonexus hydrophilus   | acyl-CoA dehydrogenase                                                                          | 8   |
| Azonexus hydrophilus   | alkyl hydroperoxide reductase                                                                   | 36  |
| Azonexus hydrophilus   | ammonia channel protein                                                                         | 4   |
| Azonexus hydrophilus   | aspartate kinase                                                                                | 12  |
| Azonexus hydrophilus   | ATPase AAA                                                                                      | 3   |
| Azonexus hydrophilus   | bifunctional 3-demethylubiquinone 3-O-methyltransferase/2-octaprenyl-6-hydroxy phenol methylase | 15  |
| Azonexus hydrophilus   | bifunctional uridylyltransferase/uridylyl-removing protein                                      | 1   |
| Azonexus hydrophilus   | branched-chain amino acid ABC transporter substrate-binding protein                             | 4   |
| Azonexus hydrophilus   | C4-dicarboxylate ABC transporter                                                                | 27  |
| Azonexus hydrophilus   | cation transporter                                                                              | 10  |
| Azonexus hydrophilus   | cell division protein FtsB                                                                      | 2   |
| Azonexus hydrophilus   | cell division protein FtsE                                                                      | 3   |
| Azonexus hydrophilus   | CoA-transferase                                                                                 | 4   |
| Azonexus hydrophilus   | cytochrome C                                                                                    | 23  |
| Azonexus hydrophilus   | decarboxylase                                                                                   | 8   |
| Azonexus hydrophilus   | deoxycytidine triphosphate deaminase                                                            | 9   |
| Azonexus hydrophilus   | DNA polymerase III subunit gamma/tau                                                            | 14  |
| Azonexus hydrophilus   | DNA-binding response regulator                                                                  | 11  |
| Azonexus hydrophilus   | electron transfer flavoprotein subunit beta                                                     | 22  |
| Azonexus hydrophilus   | elongation factor G                                                                             | 7   |
| Azonexus hydrophilus   | gamma carbonic anhydrase family protein                                                         | 2   |
| Azonexus hydrophilus   | GDP-fucose synthetase                                                                           | 3   |
| Azonexus hydrophilus   | glutamine--tRNA ligase                                                                          | 4   |
| Azonexus hydrophilus   | GntR family transcriptional regulator                                                           | 8   |
| Azonexus hydrophilus   | GTP pyrophosphokinase                                                                           | 6   |

|                      |                                                    |     |
|----------------------|----------------------------------------------------|-----|
| Azonexus hydrophilus | haloacid dehalogenase                              | 7   |
| Azonexus hydrophilus | histidine kinase                                   | 2   |
| Azonexus hydrophilus | hybrid sensor histidine kinase/response regulator  | 6   |
| Azonexus hydrophilus | hydrogenase assembly protein HupF                  | 9   |
| Azonexus hydrophilus | hypothetical protein                               | 259 |
| Azonexus hydrophilus | hypothetical protein, partial                      | 37  |
| Azonexus hydrophilus | L-aspartate oxidase                                | 3   |
| Azonexus hydrophilus | long-chain-fatty-acid--CoA ligase                  | 7   |
| Azonexus hydrophilus | mannose-1-phosphate guanyltransferase              | 27  |
| Azonexus hydrophilus | mechanosensitive ion channel protein MscS, partial | 4   |
| Azonexus hydrophilus | membrane protein                                   | 49  |
| Azonexus hydrophilus | metal-binding protein                              | 8   |
| Azonexus hydrophilus | methionine aminopeptidase                          | 12  |
| Azonexus hydrophilus | methylmalonyl-CoA mutase                           | 3   |
| Azonexus hydrophilus | molybdopterin synthase sulfur carrier subunit      | 7   |
| Azonexus hydrophilus | NADH dehydrogenase                                 | 4   |
| Azonexus hydrophilus | orotidine 5'-phosphate decarboxylase               | 2   |
| Azonexus hydrophilus | paraslipin                                         | 7   |
| Azonexus hydrophilus | peptide methionine sulfoxide reductase             | 0   |
| Azonexus hydrophilus | peptidoglycan-binding protein                      | 14  |
| Azonexus hydrophilus | phosphodiesterase                                  | 2   |
| Azonexus hydrophilus | phosphoenolpyruvate carboxykinase                  | 8   |
| Azonexus hydrophilus | phospholipase                                      | 18  |
| Azonexus hydrophilus | phospholipid-binding protein                       | 8   |
| Azonexus hydrophilus | pilus assembly protein PilO                        | 11  |
| Azonexus hydrophilus | preprotein translocase subunit SecF                | 6   |
| Azonexus hydrophilus | protease                                           | 5   |
| Azonexus hydrophilus | radical SAM protein                                | 11  |
| Azonexus hydrophilus | recombinase RdgC                                   | 3   |
| Azonexus hydrophilus | ribose and galactose chemoreceptor protein         | 2   |
| Azonexus hydrophilus | RNA polymerase sigma factor RpoE                   | 17  |
| Azonexus hydrophilus | single-stranded DNA-binding protein                | 13  |
| Azonexus hydrophilus | sodium:calcium antiporter                          | 4   |
| Azonexus hydrophilus | sulfate transporter                                | 4   |
| Azonexus hydrophilus | superoxide dismutase                               | 12  |
| Azonexus hydrophilus | thioesterase                                       | 10  |
| Azonexus hydrophilus | thiol reductase thioredoxin                        | 7   |
| Azonexus hydrophilus | threonine--tRNA ligase                             | 6   |
| Azonexus hydrophilus | TIGR00645 family protein                           | 2   |
| Azonexus hydrophilus | TIGR02099 family protein                           | 2   |
| Azonexus hydrophilus | toxin YoeB                                         | 6   |
| Azonexus hydrophilus | transcriptional regulator                          | 10  |
| Azonexus hydrophilus | transporter                                        | 9   |
| Azonexus hydrophilus | transposase                                        | 4   |
| Azonexus hydrophilus | tRNA (cytidine/uridine-2'-O-)-methyltransferase    | 1   |
| Azonexus hydrophilus | type II restriction endonuclease                   | 3   |
| Azospira oryzae      | 1-deoxy-D-xylulose-5-phosphate synthase            | 6   |
| Azospira oryzae      | 23S rRNA pseudouridylate synthase B                | 4   |
| Azospira oryzae      | 3-deoxy-8-phosphooctulonate synthase               | 6   |
| Azospira oryzae      | ABC transporter ATP-binding protein                | 10  |
| Azospira oryzae      | ABC transporter substrate-binding protein          | 4   |
| Azospira oryzae      | acetoacetyl-CoA synthetase                         | 13  |
| Azospira oryzae      | aspartate aminotransferase                         | 2   |
| Azospira oryzae      | aspartyl protease                                  | 11  |
| Azospira oryzae      | ATP synthase subunit B                             | 3   |
| Azospira oryzae      | ATP-dependent Clp protease ClpC                    | 4   |
| Azospira oryzae      | bacterioferritin                                   | 16  |
| Azospira oryzae      | cag pathogenicity island protein Cag6              | 2   |
| Azospira oryzae      | cell division protein FtsX                         | 6   |
| Azospira oryzae      | chemotaxis protein                                 | 5   |
| Azospira oryzae      | chromate resistance protein                        | 3   |
| Azospira oryzae      | Co2+/Mg2+ efflux protein ApaG                      | 6   |
| Azospira oryzae      | cysteine--tRNA ligase                              | 11  |
| Azospira oryzae      | cytochrome C                                       | 9   |
| Azospira oryzae      | D-2-hydroxyacid dehydrogenase                      | 3   |
| Azospira oryzae      | diacylglycerol kinase                              | 5   |
| Azospira oryzae      | diguanylate cyclase                                | 6   |
| Azospira oryzae      | dihydroilipoamide acetyltransferase                | 15  |
| Azospira oryzae      | dihydroilipoamide succinyltransferase              | 13  |
| Azospira oryzae      | entericidin                                        | 15  |
| Azospira oryzae      | general secretion pathway protein H                | 11  |
| Azospira oryzae      | glutamate racemase                                 | 6   |
| Azospira oryzae      | glutamate synthase subunit beta                    | 56  |
| Azospira oryzae      | glutaredoxin-like protein                          | 6   |

|                      |                                                                        |     |
|----------------------|------------------------------------------------------------------------|-----|
| Azospira oryzae      | glutathione ABC transporter ATP-binding protein                        | 4   |
| Azospira oryzae      | GTP-binding protein                                                    | 2   |
| Azospira oryzae      | heat-shock protein Hsp20                                               | 7   |
| Azospira oryzae      | hemagglutination activity protein                                      | 4   |
| Azospira oryzae      | heme ABC transporter permease                                          | 13  |
| Azospira oryzae      | heme lyase subunit CcmF                                                | 7   |
| Azospira oryzae      | heptosyltransferase                                                    | 4   |
| Azospira oryzae      | hydroxymethylpyrimidine/phosphomethylpyrimidine kinase                 | 6   |
| Azospira oryzae      | hypothetical protein                                                   | 139 |
| Azospira oryzae      | integrase                                                              | 2   |
| Azospira oryzae      | isochorismate synthase family protein                                  | 1   |
| Azospira oryzae      | isovaleryl-CoA dehydrogenase                                           | 4   |
| Azospira oryzae      | lipid A biosynthesis acyltransferase                                   | 2   |
| Azospira oryzae      | LysR family transcriptional regulator                                  | 5   |
| Azospira oryzae      | membrane protein                                                       | 53  |
| Azospira oryzae      | membrane-bound metallopeptidase                                        | 4   |
| Azospira oryzae      | MFS transporter                                                        | 13  |
| Azospira oryzae      | MSHA-type pilus biogenesis protein MshL                                | 3   |
| Azospira oryzae      | multidrug ABC transporter substrate-binding protein                    | 11  |
| Azospira oryzae      | N-acetylglutamate synthase                                             | 1   |
| Azospira oryzae      | nitrogen regulatory protein P-II 1                                     | 2   |
| Azospira oryzae      | o-succinylbenzoic acid synthetase                                      | 3   |
| Azospira oryzae      | octaprenyl diphosphate synthase                                        | 14  |
| Azospira oryzae      | outer membrane protein                                                 | 4   |
| Azospira oryzae      | PAS domain S-box/diguanylate cyclase (GGDEF) domain-containing protein | 5   |
| Azospira oryzae      | penicillin-binding protein 1A                                          | 3   |
| Azospira oryzae      | peptidase                                                              | 12  |
| Azospira oryzae      | peptide ABC transporter permease                                       | 8   |
| Azospira oryzae      | peptidoglycan-binding protein                                          | 4   |
| Azospira oryzae      | phosphodiesterase                                                      | 8   |
| Azospira oryzae      | phosphohydrolase                                                       | 8   |
| Azospira oryzae      | pilus assembly protein PilP                                            | 17  |
| Azospira oryzae      | Plasmid replication region DNA-binding N-term protein, partial         | 2   |
| Azospira oryzae      | prepilin-type cleavage/methylation protein                             | 10  |
| Azospira oryzae      | preprotein translocase subunit TatB                                    | 30  |
| Azospira oryzae      | protein fixB                                                           | 1   |
| Azospira oryzae      | protein-L-isoaspartate O-methyltransferase                             | 12  |
| Azospira oryzae      | protein-serine/threonine phosphatase                                   | 1   |
| Azospira oryzae      | pyridoxine 5'-phosphate synthase                                       | 2   |
| Azospira oryzae      | resolvase                                                              | 2   |
| Azospira oryzae      | RNA pyrophosphohydrolase                                               | 23  |
| Azospira oryzae      | secretion system protein E                                             | 3   |
| Azospira oryzae      | serine/threonine protein kinase                                        | 5   |
| Azospira oryzae      | serine/threonine protein phosphatase                                   | 2   |
| Azospira oryzae      | signal-transduction protein containing cAMP-binding and CBS domains    | 3   |
| Azospira oryzae      | sodium:phosphate symporter                                             | 3   |
| Azospira oryzae      | sugar transporter                                                      | 14  |
| Azospira oryzae      | tetrathionate reductase                                                | 16  |
| Azospira oryzae      | Tfp pilus assembly protein FimT                                        | 9   |
| Azospira oryzae      | thioesterase                                                           | 6   |
| Azospira oryzae      | threonine-phosphate decarboxylase                                      | 3   |
| Azospira oryzae      | TonB-dependent receptor                                                | 2   |
| Azospira oryzae      | transporter                                                            | 33  |
| Azospira oryzae      | transposase                                                            | 5   |
| Azospira oryzae      | tRNA (guanine(37)-N(1))-methyltransferase                              | 18  |
| Azospira oryzae      | two-component sensor histidine kinase                                  | 2   |
| Azospira oryzae      | two-component system response regulator                                | 12  |
| Azospira oryzae      | type II secretion system protein F                                     | 16  |
| Azospira oryzae      | ubiquinone biosynthesis hydroxylase                                    | 20  |
| Azospira oryzae      | ubiquinone biosynthesis protein UbiB                                   | 10  |
| Azospira oryzae      | UDP-glucose 4-epimerase                                                | 4   |
| Azospira oryzae      | UDP-N-acetylmuramoylalanyl-D-glutamate--2, 6-diaminopimelate ligase    | 4   |
| Azovibrio restrictus | 2,3,4,5-tetrahydropyridine-2,6-dicarboxylate N-succinyltransferase     | 8   |
| Azovibrio restrictus | 50S ribosomal protein L34                                              | 1   |
| Azovibrio restrictus | 50S ribosomal protein L9                                               | 7   |
| Azovibrio restrictus | A1-2E family transporter                                               | 12  |
| Azovibrio restrictus | arsenic transporter                                                    | 5   |
| Azovibrio restrictus | arsenite transporter                                                   | 2   |
| Azovibrio restrictus | asparagine synthetase B                                                | 6   |
| Azovibrio restrictus | ATP synthase subunit beta                                              | 30  |
| Azovibrio restrictus | ATP-dependent protease                                                 | 7   |
| Azovibrio restrictus | ATPase                                                                 | 11  |
| Azovibrio restrictus | ATPase P                                                               | 4   |
| Azovibrio restrictus | branched chain amino acid ABC transporter substrate-binding protein    | 6   |

|                       |                                                                         |     |
|-----------------------|-------------------------------------------------------------------------|-----|
| Azovibrio restrictus  | carbamoyl-phosphate synthase small subunit                              | 2   |
| Azovibrio restrictus  | cell division protein FtsA                                              | 2   |
| Azovibrio restrictus  | chemotaxis protein CheC                                                 | 2   |
| Azovibrio restrictus  | chemotaxis protein CheY                                                 | 8   |
| Azovibrio restrictus  | chromosome partitioning protein                                         | 3   |
| Azovibrio restrictus  | cobalt-precorrin-4 C(11)-methyltransferase                              | 2   |
| Azovibrio restrictus  | colicin V production protein                                            | 4   |
| Azovibrio restrictus  | cyanophycin synthetase                                                  | 17  |
| Azovibrio restrictus  | cytochrome C biogenesis protein CcsA                                    | 12  |
| Azovibrio restrictus  | cytochrome d terminal oxidase subunit I                                 | 3   |
| Azovibrio restrictus  | cytochrome d ubiquinol oxidase subunit 2                                | 3   |
| Azovibrio restrictus  | DNA repair protein RecN                                                 | 3   |
| Azovibrio restrictus  | DNA-deoxyinosine glycosylase                                            | 3   |
| Azovibrio restrictus  | Fe(2+)-trafficking protein                                              | 5   |
| Azovibrio restrictus  | ferritin                                                                | 6   |
| Azovibrio restrictus  | fimbrial protein                                                        | 8   |
| Azovibrio restrictus  | Fis family transcriptional regulator                                    | 5   |
| Azovibrio restrictus  | flagellar biosynthesis protein flip                                     | 2   |
| Azovibrio restrictus  | flagellar motor protein MotD                                            | 2   |
| Azovibrio restrictus  | glycerol-3-phosphate acyltransferase                                    | 5   |
| Azovibrio restrictus  | glycine--tRNA ligase subunit alpha                                      | 9   |
| Azovibrio restrictus  | glycine--tRNA ligase subunit beta                                       | 2   |
| Azovibrio restrictus  | glycoside hydrolase                                                     | 8   |
| Azovibrio restrictus  | GNAT family N-acetyltransferase                                         | 1   |
| Azovibrio restrictus  | GTP cyclohydrolase                                                      | 5   |
| Azovibrio restrictus  | haloacid dehalogenase                                                   | 8   |
| Azovibrio restrictus  | histidine kinase                                                        | 16  |
| Azovibrio restrictus  | hypothetical protein                                                    | 348 |
| Azovibrio restrictus  | integrase                                                               | 4   |
| Azovibrio restrictus  | lactamase                                                               | 16  |
| Azovibrio restrictus  | lysine 2,3-aminomutase                                                  | 3   |
| Azovibrio restrictus  | mannose-1-phosphate guanylyltransferase                                 | 4   |
| Azovibrio restrictus  | membrane protein                                                        | 9   |
| Azovibrio restrictus  | methionine--tRNA ligase                                                 | 7   |
| Azovibrio restrictus  | NAD(P)-dependent oxidoreductase                                         | 4   |
| Azovibrio restrictus  | NADH dehydrogenase                                                      | 10  |
| Azovibrio restrictus  | nucleoside-diphosphate kinase                                           | 9   |
| Azovibrio restrictus  | orotate phosphoribosyltransferase                                       | 15  |
| Azovibrio restrictus  | peptidase                                                               | 2   |
| Azovibrio restrictus  | peptidylprolyl isomerase                                                | 8   |
| Azovibrio restrictus  | phytoene synthase                                                       | 6   |
| Azovibrio restrictus  | polyphosphate kinase 2                                                  | 12  |
| Azovibrio restrictus  | preprotein translocase subunit SecE                                     | 11  |
| Azovibrio restrictus  | preprotein translocase subunit TatC                                     | 3   |
| Azovibrio restrictus  | preprotein translocase subunit Tim44                                    | 7   |
| Azovibrio restrictus  | prevent-host-death protein                                              | 6   |
| Azovibrio restrictus  | protease HtpX                                                           | 7   |
| Azovibrio restrictus  | SsrA-binding protein                                                    | 2   |
| Azovibrio restrictus  | stationary phase survival protein SurE                                  | 8   |
| Azovibrio restrictus  | transcriptional regulator                                               | 10  |
| Azovibrio restrictus  | transcriptional regulator HU subunit alpha                              | 5   |
| Azovibrio restrictus  | twitching motility protein PilT                                         | 3   |
| Azovibrio restrictus  | UDP-2,3-diacetylglucosamine hydrolase                                   | 19  |
| Azovibrio restrictus  | UDP-N-acetylmuramoylalanine--D-glutamate ligase                         | 3   |
| Azovibrio restrictus  | zinc protease                                                           | 6   |
| Betaproteobacteria    | MULTISPECIES: hypothetical protein                                      | 10  |
| Dechloromonas agitata | 2-octaprenyl-3-methyl-6-methoxy-1,4-benzoquinol hydroxylase             | 5   |
| Dechloromonas agitata | 2-succinyl-5-enolpyruvyl-6-hydroxy-3-cyclohexene-1-carboxylate synthase | 3   |
| Dechloromonas agitata | 3-isopropylmalate dehydrogenase                                         | 15  |
| Dechloromonas agitata | 5,10-methylenetetrahydrofolate reductase                                | 3   |
| Dechloromonas agitata | 6-phosphofructokinase                                                   | 25  |
| Dechloromonas agitata | ABC transporter permease                                                | 16  |
| Dechloromonas agitata | acyl--CoA ligase                                                        | 17  |
| Dechloromonas agitata | acyltransferase                                                         | 2   |
| Dechloromonas agitata | arsenate reductase                                                      | 2   |
| Dechloromonas agitata | AsnC family transcriptional regulator                                   | 8   |
| Dechloromonas agitata | asparagine synthetase B                                                 | 6   |
| Dechloromonas agitata | ATP synthase subunit A                                                  | 33  |
| Dechloromonas agitata | ATPase                                                                  | 4   |
| Dechloromonas agitata | c-type cytochrome biogenesis protein CcmI                               | 9   |
| Dechloromonas agitata | carbamoyl phosphate synthase large subunit                              | 8   |
| Dechloromonas agitata | carbon-phosphorus lyase                                                 | 21  |
| Dechloromonas agitata | carbon-phosphorus lyase complex subunit PhnJ                            | 9   |
| Dechloromonas agitata | carbon-phosphorus lyase subunit PhnH                                    | 19  |



|                       |                                                                    |     |
|-----------------------|--------------------------------------------------------------------|-----|
| Dechloromonas agitata | carbonate dehydratase                                              | 6   |
| Dechloromonas agitata | carbonic anhydrase                                                 | 7   |
| Dechloromonas agitata | CDP-diacylglycerol--glycerol-3-phosphate 3-phosphatidyltransferase | 10  |
| Dechloromonas agitata | cell division protein FtsQ                                         | 3   |
| Dechloromonas agitata | cell shape determination protein CcmA                              | 14  |
| Dechloromonas agitata | chain length-determining protein                                   | 32  |
| Dechloromonas agitata | class III cytochrome C family protein                              | 9   |
| Dechloromonas agitata | cobalamin biosynthesis protein CbiG                                | 4   |
| Dechloromonas agitata | coproporphyrinogen III oxidase                                     | 4   |
| Dechloromonas agitata | crotonase                                                          | 13  |
| Dechloromonas agitata | CTP synthetase                                                     | 5   |
| Dechloromonas agitata | cysteine methyltransferase                                         | 5   |
| Dechloromonas agitata | cytochrome C                                                       | 73  |
| Dechloromonas agitata | diguanylate cyclase                                                | 2   |
| Dechloromonas agitata | dioxygenase                                                        | 2   |
| Dechloromonas agitata | DNA polymerase III subunit epsilon                                 | 2   |
| Dechloromonas agitata | DNA starvation/stationary phase protection protein                 | 101 |
| Dechloromonas agitata | DNA topoisomerase III                                              | 6   |
| Dechloromonas agitata | DNA-binding protein                                                | 11  |
| Dechloromonas agitata | DNA-binding response regulator                                     | 15  |
| Dechloromonas agitata | DNA-directed RNA polymerase sigma-70 factor                        | 11  |
| Dechloromonas agitata | dTDP-glucose 4,6-dehydratase                                       | 2   |
| Dechloromonas agitata | ferric reductase                                                   | 9   |
| Dechloromonas agitata | ferrous iron transporter B                                         | 2   |
| Dechloromonas agitata | flagellar basal body rod protein FlgG                              | 12  |
| Dechloromonas agitata | general secretion pathway protein GspH                             | 10  |
| Dechloromonas agitata | glutamate dehydrogenase                                            | 2   |
| Dechloromonas agitata | glutamyl-tRNA amidotransferase                                     | 2   |
| Dechloromonas agitata | glutaredoxin                                                       | 10  |
| Dechloromonas agitata | glycosyl transferase family I                                      | 3   |
| Dechloromonas agitata | GTPase                                                             | 9   |
| Dechloromonas agitata | heat-shock protein HtpX                                            | 15  |
| Dechloromonas agitata | hemolysin secretion protein D                                      | 2   |
| Dechloromonas agitata | histidine kinase                                                   | 7   |
| Dechloromonas agitata | hybrid sensor histidine kinase/response regulator                  | 3   |
| Dechloromonas agitata | hydrogenase 2 maturation endopeptidase                             | 15  |
| Dechloromonas agitata | hypothetical protein                                               | 551 |
| Dechloromonas agitata | integration host factor subunit beta                               | 29  |
| Dechloromonas agitata | lipid transporter ATP-binding/permease                             | 1   |
| Dechloromonas agitata | long-chain-fatty-acid--CoA ligase                                  | 5   |
| Dechloromonas agitata | LPS export ABC transporter permease LptF                           | 3   |
| Dechloromonas agitata | lysine transporter LysE                                            | 6   |
| Dechloromonas agitata | major capsid protein                                               | 1   |
| Dechloromonas agitata | malic enzyme                                                       | 8   |
| Dechloromonas agitata | membrane protein                                                   | 8   |
| Dechloromonas agitata | methionine adenosyltransferase                                     | 2   |
| Dechloromonas agitata | methylcrotonoyl-CoA carboxylase                                    | 4   |
| Dechloromonas agitata | NAD(FAD)-utilizing dehydrogenase                                   | 2   |
| Dechloromonas agitata | NADH-ubiquinone oxidoreductase subunit 6                           | 6   |
| Dechloromonas agitata | NADP oxidoreductase                                                | 8   |
| Dechloromonas agitata | Nif3-like dinuclear metal center hexameric protein                 | 11  |
| Dechloromonas agitata | nitrate reductase                                                  | 8   |
| Dechloromonas agitata | nucleotide exchange factor GrpE                                    | 5   |
| Dechloromonas agitata | patatin                                                            | 1   |
| Dechloromonas agitata | peptidase M1                                                       | 8   |
| Dechloromonas agitata | peptidase M50                                                      | 5   |
| Dechloromonas agitata | peptide ABC transporter permease                                   | 5   |
| Dechloromonas agitata | phosphate ABC transporter permease                                 | 4   |
| Dechloromonas agitata | phosphate ABC transporter substrate-binding protein                | 19  |
| Dechloromonas agitata | phosphonate ABC transporter                                        | 8   |
| Dechloromonas agitata | phosphonate ABC transporter ATP-binding protein                    | 16  |
| Dechloromonas agitata | phosphonate ABC transporter permease                               | 8   |
| Dechloromonas agitata | phosphonate ABC transporter substrate-binding protein              | 16  |
| Dechloromonas agitata | phosphonate C-P lyase system protein PhnK                          | 11  |
| Dechloromonas agitata | phosphonate metabolism protein PhnG                                | 9   |
| Dechloromonas agitata | phosphonate metabolism protein PhnM                                | 3   |
| Dechloromonas agitata | phosphonate metabolism transcriptional regulator PhnF              | 49  |
| Dechloromonas agitata | phosphoserine phosphatase                                          | 3   |
| Dechloromonas agitata | plasmid stabilization protein                                      | 2   |
| Dechloromonas agitata | precorrin-8X methylmutase                                          | 3   |
| Dechloromonas agitata | protein nirF                                                       | 2   |
| Dechloromonas agitata | protein tyrosine kinase                                            | 3   |
| Dechloromonas agitata | pyruvate-flavodoxin oxidoreductase                                 | 6   |
| Dechloromonas agitata | ribonuclease P protein component                                   | 2   |

|                         |                                                                      |     |
|-------------------------|----------------------------------------------------------------------|-----|
| Dechloromonas agitata   | ribose-phosphate pyrophosphokinase                                   | 5   |
| Dechloromonas agitata   | ribosome silencing factor RsfS                                       | 8   |
| Dechloromonas agitata   | ribosome-associated GTPase EngA                                      | 2   |
| Dechloromonas agitata   | sodium-dependent bicarbonate transport family permease               | 10  |
| Dechloromonas agitata   | sodium:proton exchanger                                              | 3   |
| Dechloromonas agitata   | succinate dehydrogenase                                              | 23  |
| Dechloromonas agitata   | tetrathionate reductase subunit A                                    | 15  |
| Dechloromonas agitata   | tetrathionate reductase subunit B                                    | 11  |
| Dechloromonas agitata   | thioesterase                                                         | 4   |
| Dechloromonas agitata   | thymidylate kinase                                                   | 3   |
| Dechloromonas agitata   | toxin                                                                | 5   |
| Dechloromonas agitata   | transposase                                                          | 5   |
| Dechloromonas agitata   | twitching motility protein PilT                                      | 21  |
| Dechloromonas agitata   | two-component sensor histidine kinase                                | 12  |
| Dechloromonas agitata   | type II secretion system protein F                                   | 9   |
| Dechloromonas agitata   | UDP-N-acetylglucosamine O-acyltransferase                            | 2   |
| Dechloromonas agitata   | UTP--glucose-1-phosphate uridylyltransferase                         | 8   |
| Dechloromonas agitata   | YgiQ family radical SAM protein                                      | 1   |
| Dechloromonas aromatica | 2-Cys peroxiredoxin                                                  | 27  |
| Dechloromonas aromatica | 2-nitropropane dioxygenase                                           | 2   |
| Dechloromonas aromatica | 2,3-bisphosphoglycerate-independent phosphoglycerate mutase          | 10  |
| Dechloromonas aromatica | 6-phosphogluconolactonase                                            | 3   |
| Dechloromonas aromatica | 7-cyano-7-deazaguanine synthase                                      | 1   |
| Dechloromonas aromatica | ABC transporter                                                      | 12  |
| Dechloromonas aromatica | ABC transporter ATP-binding protein                                  | 3   |
| Dechloromonas aromatica | ABC transporter permease                                             | 7   |
| Dechloromonas aromatica | acetyl-CoA acetyltransferase                                         | 22  |
| Dechloromonas aromatica | acyl-CoA dehydrogenase                                               | 18  |
| Dechloromonas aromatica | aldolase                                                             | 2   |
| Dechloromonas aromatica | alpha/beta hydrolase                                                 | 101 |
| Dechloromonas aromatica | aromatic acid decarboxylase                                          | 13  |
| Dechloromonas aromatica | aromatic hydrocarbon degradation protein                             | 10  |
| Dechloromonas aromatica | arsenic resistance protein ArsB                                      | 2   |
| Dechloromonas aromatica | ATP-dependent Clp protease adaptor ClpS                              | 17  |
| Dechloromonas aromatica | biopolymer transporter ExbD                                          | 5   |
| Dechloromonas aromatica | branched-chain amino acid ABC transporter substrate-binding protein  | 6   |
| Dechloromonas aromatica | chemotaxis protein CheR                                              | 3   |
| Dechloromonas aromatica | chemotaxis protein CheY                                              | 16  |
| Dechloromonas aromatica | cobalt-precorrin-6A synthase                                         | 3   |
| Dechloromonas aromatica | cobyric acid synthase CobQ                                           | 2   |
| Dechloromonas aromatica | copper ABC transporter ATPase                                        | 4   |
| Dechloromonas aromatica | cyclic pyranopterin phosphate synthase MoaA                          | 4   |
| Dechloromonas aromatica | cytochrome B561                                                      | 13  |
| Dechloromonas aromatica | deoxyuridine 5'-triphosphate nucleotidohydrolase                     | 13  |
| Dechloromonas aromatica | diaminohydroxyphosphoribosylaminopyrimidine deaminase                | 5   |
| Dechloromonas aromatica | diguanylate cyclase                                                  | 7   |
| Dechloromonas aromatica | dihydroxynaphthoic acid synthetase                                   | 3   |
| Dechloromonas aromatica | DNA ligase                                                           | 1   |
| Dechloromonas aromatica | DNA polymerase III subunit chi                                       | 4   |
| Dechloromonas aromatica | DNA primase                                                          | 2   |
| Dechloromonas aromatica | DNA-binding response regulator                                       | 12  |
| Dechloromonas aromatica | DSBA oxidoreductase                                                  | 8   |
| Dechloromonas aromatica | dTDP-4-dehydrorhamnose 3,5-epimerase                                 | 2   |
| Dechloromonas aromatica | enoyl-CoA hydratase                                                  | 1   |
| Dechloromonas aromatica | esterase                                                             | 2   |
| Dechloromonas aromatica | exopolysaccharide biosynthesis polyprenyl glycosylphosphotransferase | 14  |
| Dechloromonas aromatica | exosortase A                                                         | 11  |
| Dechloromonas aromatica | FOF1 ATP synthase subunit C                                          | 7   |
| Dechloromonas aromatica | ferredoxin                                                           | 5   |
| Dechloromonas aromatica | flagellar brake protein YcgR                                         | 2   |
| Dechloromonas aromatica | formate transporter                                                  | 2   |
| Dechloromonas aromatica | glutaredoxin                                                         | 3   |
| Dechloromonas aromatica | glycosyl transferase                                                 | 13  |
| Dechloromonas aromatica | glycosyl transferase family 1                                        | 1   |
| Dechloromonas aromatica | glycosyltransferase WbuB                                             | 5   |
| Dechloromonas aromatica | GTP-binding protein                                                  | 2   |
| Dechloromonas aromatica | heme d1 biosynthesis radical SAM protein NirJ                        | 3   |
| Dechloromonas aromatica | hypothetical protein                                                 | 202 |
| Dechloromonas aromatica | integrase                                                            | 14  |
| Dechloromonas aromatica | iron ABC transporter permease                                        | 3   |
| Dechloromonas aromatica | lysine decarboxylase                                                 | 4   |
| Dechloromonas aromatica | lytic transglycosylase                                               | 3   |
| Dechloromonas aromatica | magnesium transporter MgtC                                           | 7   |
| Dechloromonas aromatica | membrane protein                                                     | 8   |

|                                |                                                           |     |
|--------------------------------|-----------------------------------------------------------|-----|
| Dechloromonas aromatica        | MFS transporter                                           | 15  |
| Dechloromonas aromatica        | molecular chaperone HtpG                                  | 2   |
| Dechloromonas aromatica        | NAD(P)H-dependent oxidoreductase                          | 3   |
| Dechloromonas aromatica        | NYN domain-containing protein                             | 9   |
| Dechloromonas aromatica        | O-succinylhomoserine sulfhydrylase                        | 2   |
| Dechloromonas aromatica        | oxidoreductase                                            | 4   |
| Dechloromonas aromatica        | PEP-CTERM domain protein                                  | 23  |
| Dechloromonas aromatica        | peptidase M48                                             | 1   |
| Dechloromonas aromatica        | peptide ABC transporter substrate-binding protein         | 3   |
| Dechloromonas aromatica        | phosphoglucomutase                                        | 5   |
| Dechloromonas aromatica        | phosphoribosylglycinamide formyltransferase 2             | 4   |
| Dechloromonas aromatica        | polysaccharide deacetylase                                | 7   |
| Dechloromonas aromatica        | precorrin-6Y C5,15-methyltransferase                      | 6   |
| Dechloromonas aromatica        | propionate--CoA ligase                                    | 9   |
| Dechloromonas aromatica        | RNA methyltransferase                                     | 7   |
| Dechloromonas aromatica        | sigma-54-dependent Fis family transcriptional regulator   | 4   |
| Dechloromonas aromatica        | sporulation protein                                       | 11  |
| Dechloromonas aromatica        | sugar transferase                                         | 4   |
| Dechloromonas aromatica        | TetR family transcriptional regulator                     | 6   |
| Dechloromonas aromatica        | thiamine-monophosphate kinase                             | 1   |
| Dechloromonas aromatica        | transcription termination factor Rho                      | 12  |
| Dechloromonas aromatica        | transcriptional regulator                                 | 11  |
| Dechloromonas aromatica        | transcriptional repressor                                 | 10  |
| Dechloromonas aromatica        | transporter                                               | 2   |
| Dechloromonas aromatica        | transposase                                               | 4   |
| Dechloromonas aromatica        | tRNA(Ile)-lysidine synthetase                             | 8   |
| Dechloromonas aromatica        | two-component sensor histidine kinase                     | 2   |
| Dechloromonas aromatica        | two-component system response regulator                   | 10  |
| Methyloversatilis              | MULTISPECIES: 30S ribosomal protein S21                   | 4   |
| Methyloversatilis              | MULTISPECIES: thiol reductase thioredoxin                 | 5   |
| Methyloversatilis discipulorum | 2-isopropylmalate synthase                                | 407 |
| Methyloversatilis discipulorum | 50S ribosomal protein L18                                 | 15  |
| Methyloversatilis discipulorum | 50S ribosomal protein L3                                  | 10  |
| Methyloversatilis discipulorum | ABC transporter substrate-binding protein                 | 2   |
| Methyloversatilis discipulorum | acetyl-CoA carboxylase carboxyl transferase subunit alpha | 12  |
| Methyloversatilis discipulorum | branched chain amino acid aminotransferase                | 23  |
| Methyloversatilis discipulorum | cell division protein ZapD                                | 9   |
| Methyloversatilis discipulorum | chemotaxis protein CheA                                   | 15  |
| Methyloversatilis discipulorum | chloride channel protein                                  | 8   |
| Methyloversatilis discipulorum | Cro/C1 family transcriptional regulator                   | 2   |
| Methyloversatilis discipulorum | cyclic pyranopterin phosphate synthase MoaA               | 1   |
| Methyloversatilis discipulorum | cytochrome B                                              | 32  |
| Methyloversatilis discipulorum | cytochrome-c peroxidase                                   | 6   |
| Methyloversatilis discipulorum | DNA helicase                                              | 2   |
| Methyloversatilis discipulorum | DNA methylase                                             | 3   |
| Methyloversatilis discipulorum | DNA polymerase I                                          | 2   |
| Methyloversatilis discipulorum | flagellar basal body rod protein FlgC                     | 20  |
| Methyloversatilis discipulorum | flagellar hook protein FlgE                               | 16  |
| Methyloversatilis discipulorum | flagellar motor protein MotA                              | 17  |
| Methyloversatilis discipulorum | four helix bundle protein                                 | 14  |
| Methyloversatilis discipulorum | GDP-mannose 4,6-dehydratase                               | 11  |
| Methyloversatilis discipulorum | granule protein PhaP                                      | 12  |
| Methyloversatilis discipulorum | hemagglutinin                                             | 16  |
| Methyloversatilis discipulorum | histidine kinase                                          | 11  |
| Methyloversatilis discipulorum | Holliday junction DNA helicase                            | 2   |
| Methyloversatilis discipulorum | hydrolase                                                 | 4   |
| Methyloversatilis discipulorum | hypothetical protein                                      | 542 |
| Methyloversatilis discipulorum | lytic transglycosylase                                    | 3   |
| Methyloversatilis discipulorum | membrane protein                                          | 23  |
| Methyloversatilis discipulorum | oligopeptidase A                                          | 6   |
| Methyloversatilis discipulorum | PEP-CTERM domain protein                                  | 115 |
| Methyloversatilis discipulorum | peptide chain release factor 2                            | 1   |
| Methyloversatilis discipulorum | phenylalanine--tRNA ligase subunit alpha                  | 7   |
| Methyloversatilis discipulorum | phosphoheptose isomerase                                  | 3   |
| Methyloversatilis discipulorum | preprotein translocase subunit SecF                       | 4   |
| Methyloversatilis discipulorum | protease TldD                                             | 6   |
| Methyloversatilis discipulorum | pteridine reductase                                       | 6   |
| Methyloversatilis discipulorum | pyridine nucleotide-disulfide oxidoreductase              | 12  |
| Methyloversatilis discipulorum | rubrerythrin                                              | 29  |
| Methyloversatilis discipulorum | sulfite dehydrogenase                                     | 2   |
| Methyloversatilis discipulorum | sulfoxide reductase catalytic subunit YedY                | 3   |
| Methyloversatilis discipulorum | thiol reductase thioredoxin                               | 3   |
| Methyloversatilis discipulorum | thiol:disulfide interchange protein                       | 7   |
| Methyloversatilis discipulorum | transcriptional regulator                                 | 24  |

|                                  |                                                                            |     |
|----------------------------------|----------------------------------------------------------------------------|-----|
| Methyloversatilis discipulorum   | translation initiation factor IF-3, partial                                | 57  |
| Methyloversatilis discipulorum   | twitching motility protein PilT                                            | 2   |
| Methyloversatilis discipulorum   | two-component system response regulator                                    | 18  |
| Methyloversatilis discipulorum   | type II citrate synthase                                                   | 23  |
| Methyloversatilis discipulorum   | type II secretion system protein E                                         | 17  |
| Methyloversatilis discipulorum   | udp-glucuronosyltransferase                                                | 3   |
| Methyloversatilis thermotolerans | 50S ribosomal protein L29                                                  | 3   |
| Methyloversatilis thermotolerans | 50S ribosomal protein L30                                                  | 7   |
| Methyloversatilis thermotolerans | ABC transporter ATP-binding protein                                        | 2   |
| Methyloversatilis thermotolerans | argininosuccinate synthase                                                 | 5   |
| Methyloversatilis thermotolerans | biopolymer transporter ExbD                                                | 10  |
| Methyloversatilis thermotolerans | cation acetate symporter                                                   | 15  |
| Methyloversatilis thermotolerans | CRISPR-associated protein Csd1                                             | 3   |
| Methyloversatilis thermotolerans | cytochrome B561                                                            | 11  |
| Methyloversatilis thermotolerans | D-alanine--D-alanine ligase                                                | 8   |
| Methyloversatilis thermotolerans | DEAD/DEAH box helicase                                                     | 4   |
| Methyloversatilis thermotolerans | DNA starvation/stationary phase protection protein                         | 18  |
| Methyloversatilis thermotolerans | elongation factor 4                                                        | 11  |
| Methyloversatilis thermotolerans | ferredoxin                                                                 | 10  |
| Methyloversatilis thermotolerans | formate--tetrahydrofolate ligase                                           | 2   |
| Methyloversatilis thermotolerans | GTP cyclohydrolase I                                                       | 5   |
| Methyloversatilis thermotolerans | GTP-binding protein                                                        | 12  |
| Methyloversatilis thermotolerans | helix-turn-helix transcriptional regulator                                 | 7   |
| Methyloversatilis thermotolerans | hydrogenase formation protein HypD                                         | 7   |
| Methyloversatilis thermotolerans | hypothetical protein                                                       | 274 |
| Methyloversatilis thermotolerans | LPS biosynthesis protein                                                   | 8   |
| Methyloversatilis thermotolerans | ModE family transcriptional regulator                                      | 2   |
| Methyloversatilis thermotolerans | N5-glutamine S-adenosyl-L-methionine-dependent methyltransferase           | 3   |
| Methyloversatilis thermotolerans | NAD(+) kinase                                                              | 6   |
| Methyloversatilis thermotolerans | orotidine 5'-phosphate decarboxylase                                       | 1   |
| Methyloversatilis thermotolerans | outer membrane lipid asymmetry maintenance protein MlaD                    | 10  |
| Methyloversatilis thermotolerans | PEP-CTERM domain protein                                                   | 19  |
| Methyloversatilis thermotolerans | pilus assembly protein                                                     | 4   |
| Methyloversatilis thermotolerans | prevent-host-death protein                                                 | 6   |
| Methyloversatilis thermotolerans | proline--tRNA ligase                                                       | 7   |
| Methyloversatilis thermotolerans | protein-tyrosine kinase                                                    | 7   |
| Methyloversatilis thermotolerans | ribonuclease E                                                             | 16  |
| Methyloversatilis thermotolerans | RND transporter                                                            | 2   |
| Methyloversatilis thermotolerans | rod shape-determining protein                                              | 22  |
| Methyloversatilis thermotolerans | shikimate 5-dehydrogenase                                                  | 21  |
| Methyloversatilis thermotolerans | two-component sensor histidine kinase                                      | 9   |
| Methyloversatilis thermotolerans | type I-C CRISPR-associated protein Cas5                                    | 8   |
| Methyloversatilis thermotolerans | UDP-2,3-diacetylglucosamine hydrolase                                      | 7   |
| Methyloversatilis thermotolerans | UDP-N-acetylmuramate--L-alanine ligase                                     | 4   |
| Methyloversatilis thermotolerans | Vi polysaccharide biosynthesis protein VipB/TviC                           | 2   |
| Methyloversatilis universalis    | 16S rRNA pseudouridine(516) synthase                                       | 15  |
| Methyloversatilis universalis    | 30S ribosomal protein S10                                                  | 8   |
| Methyloversatilis universalis    | 30S ribosomal protein S13                                                  | 22  |
| Methyloversatilis universalis    | 4-(cytidine 5'-diphospho)-2-C-methyl-D-erythritol kinase                   | 3   |
| Methyloversatilis universalis    | 50S ribosomal protein L23                                                  | 6   |
| Methyloversatilis universalis    | 50S ribosomal protein L7/L12                                               | 13  |
| Methyloversatilis universalis    | acetyl-CoA carboxylase biotin carboxyl carrier protein subunit             | 7   |
| Methyloversatilis universalis    | acetylglutamate kinase                                                     | 33  |
| Methyloversatilis universalis    | adenosylcobinamide kinase/adenosylcobinamide phosphate guanylyltransferase | 4   |
| Methyloversatilis universalis    | ammonia channel protein                                                    | 3   |
| Methyloversatilis universalis    | aspartyl-tRNA amidotransferase subunit B                                   | 5   |
| Methyloversatilis universalis    | ATP-binding protein                                                        | 9   |
| Methyloversatilis universalis    | C4-dicarboxylate ABC transporter                                           | 17  |
| Methyloversatilis universalis    | carbamoyl-phosphate synthase small subunit                                 | 9   |
| Methyloversatilis universalis    | chain-length determining protein                                           | 9   |
| Methyloversatilis universalis    | chromosomal replication initiator protein DnaA                             | 7   |
| Methyloversatilis universalis    | class V aminotransferase                                                   | 13  |
| Methyloversatilis universalis    | cob(I)yrinic acid a,c-diamide adenosyltransferase                          | 2   |
| Methyloversatilis universalis    | cobyric acid synthase CobQ                                                 | 17  |
| Methyloversatilis universalis    | Crp/Fnr family transcriptional regulator                                   | 4   |
| Methyloversatilis universalis    | disulfide isomerase                                                        | 25  |
| Methyloversatilis universalis    | DNA methyltransferase                                                      | 3   |
| Methyloversatilis universalis    | DNA repair protein RadA                                                    | 2   |
| Methyloversatilis universalis    | DNA-binding response regulator                                             | 8   |
| Methyloversatilis universalis    | DNA-directed RNA polymerase subunit omega                                  | 4   |
| Methyloversatilis universalis    | elongation factor Ts                                                       | 29  |
| Methyloversatilis universalis    | enoyl-ACP reductase                                                        | 6   |
| Methyloversatilis universalis    | FHA domain-containing protein                                              | 11  |
| Methyloversatilis universalis    | flagellar assembly protein FliH                                            | 3   |

|                                 |                                                              |     |
|---------------------------------|--------------------------------------------------------------|-----|
| Methyloversatilis universalis   | flagellar protein FlhS                                       | 11  |
| Methyloversatilis universalis   | formylmethanofuran dehydrogenase subunit A                   | 3   |
| Methyloversatilis universalis   | four helix bundle protein                                    | 5   |
| Methyloversatilis universalis   | fumarate hydratase                                           | 3   |
| Methyloversatilis universalis   | GPase CgtA                                                   | 5   |
| Methyloversatilis universalis   | hydroxypyruvate reductase                                    | 4   |
| Methyloversatilis universalis   | hypothetical protein                                         | 131 |
| Methyloversatilis universalis   | iron-sulfur cluster scaffold-like protein                    | 8   |
| Methyloversatilis universalis   | metallo-hydrolase                                            | 3   |
| Methyloversatilis universalis   | multidrug transporter                                        | 6   |
| Methyloversatilis universalis   | NAD(P) transhydrogenase subunit alpha                        | 9   |
| Methyloversatilis universalis   | osmotically inducible protein C                              | 5   |
| Methyloversatilis universalis   | peptidylprolyl isomerase                                     | 14  |
| Methyloversatilis universalis   | peroxiredoxin                                                | 5   |
| Methyloversatilis universalis   | preprotein translocase subunit SecB                          | 4   |
| Methyloversatilis universalis   | pyridine nucleotide transhydrogenase                         | 6   |
| Methyloversatilis universalis   | regulator                                                    | 3   |
| Methyloversatilis universalis   | ribulose biphosphate carboxylase small chain                 | 10  |
| Methyloversatilis universalis   | secretin                                                     | 9   |
| Methyloversatilis universalis   | siderophore-interacting protein                              | 2   |
| Methyloversatilis universalis   | sodium-independent anion transporter                         | 7   |
| Methyloversatilis universalis   | sugar transferase                                            | 7   |
| Methyloversatilis universalis   | thiamine biosynthesis protein ThiF                           | 3   |
| Methyloversatilis universalis   | transcription elongation factor GreA                         | 4   |
| Methyloversatilis universalis   | transcriptional regulator                                    | 44  |
| Methyloversatilis universalis   | transporter                                                  | 3   |
| Methyloversatilis universalis   | tRNA-2-methylthio-N(6)-dimethylallyl adenosine synthase MiaB | 3   |
| Methyloversatilis universalis   | type I-C CRISPR-associated protein Cas7/Csd2                 | 4   |
| Methyloversatilis universalis   | type II secretion system protein                             | 4   |
| Methyloversatilis universalis   | UDP-N-acetyl glucosamine 2-epimerase                         | 2   |
| Methyloversatilis universalis   | zinc metalloprotease                                         | 4   |
| Proteobacteria                  | MULTISPECIES: arsenate reductase                             | 10  |
| Proteobacteria                  | MULTISPECIES: hypothetical protein                           | 10  |
| Proteobacteria                  | MULTISPECIES: membrane protein                               | 5   |
| Proteobacteria                  | MULTISPECIES: MerR family transcriptional regulator          | 2   |
| Proteobacteria                  | MULTISPECIES: TetR family transcriptional regulator          | 5   |
| Rhodocyclaceae                  | MULTISPECIES: 30S ribosomal protein S11                      | 2   |
| Rhodocyclaceae                  | MULTISPECIES: 50S ribosomal protein L13                      | 41  |
| Rhodocyclaceae                  | MULTISPECIES: cold-shock protein                             | 25  |
| Rhodocyclaceae                  | MULTISPECIES: molecular chaperone GroES                      | 30  |
| Rhodocyclaceae                  | MULTISPECIES: prevent-host-death protein                     | 10  |
| Rhodocyclaceae                  | MULTISPECIES: rubrerythrin                                   | 8   |
| Rhodocyclaceae bacterium Paddy- | 16S rRNA pseudouridine(516) synthase                         | 5   |
| Rhodocyclaceae bacterium Paddy- | 3-hydroxy-2-methylbutyryl-CoA dehydrogenase                  | 11  |
| Rhodocyclaceae bacterium Paddy- | 3-ketoacyl-ACP reductase, partial                            | 18  |
| Rhodocyclaceae bacterium Paddy- | 30S ribosomal protein S16                                    | 1   |
| Rhodocyclaceae bacterium Paddy- | 30S ribosomal protein S20                                    | 2   |
| Rhodocyclaceae bacterium Paddy- | 50S ribosomal protein L16                                    | 29  |
| Rhodocyclaceae bacterium Paddy- | 50S ribosomal protein L27                                    | 16  |
| Rhodocyclaceae bacterium Paddy- | ABC transporter                                              | 3   |
| Rhodocyclaceae bacterium Paddy- | ABC transporter ATP-binding protein                          | 3   |
| Rhodocyclaceae bacterium Paddy- | ABC transporter substrate-binding protein                    | 2   |
| Rhodocyclaceae bacterium Paddy- | ACP S-malonyltransferase                                     | 4   |
| Rhodocyclaceae bacterium Paddy- | ADP-L-glycero-D-mannoheptose-6-epimerase                     | 3   |
| Rhodocyclaceae bacterium Paddy- | alanine racemase                                             | 3   |
| Rhodocyclaceae bacterium Paddy- | alanine-tRNA ligase                                          | 5   |
| Rhodocyclaceae bacterium Paddy- | aldehyde dehydrogenase                                       | 2   |
| Rhodocyclaceae bacterium Paddy- | aminotransferase                                             | 8   |
| Rhodocyclaceae bacterium Paddy- | ArsR family transcriptional regulator                        | 8   |
| Rhodocyclaceae bacterium Paddy- | asparagine synthase                                          | 2   |
| Rhodocyclaceae bacterium Paddy- | aspartate-semialdehyde dehydrogenase                         | 5   |
| Rhodocyclaceae bacterium Paddy- | ATP-dependent Clp protease ATP-binding subunit ClpX          | 19  |
| Rhodocyclaceae bacterium Paddy- | capsular biosynthesis protein                                | 4   |
| Rhodocyclaceae bacterium Paddy- | cobalamin biosynthesis protein CbiX                          | 2   |
| Rhodocyclaceae bacterium Paddy- | cobyrinic acid a,c-diamide synthase                          | 1   |
| Rhodocyclaceae bacterium Paddy- | competence protein ComJ                                      | 6   |
| Rhodocyclaceae bacterium Paddy- | Crp/Fnr family transcriptional regulator                     | 3   |
| Rhodocyclaceae bacterium Paddy- | cyanophycin synthetase                                       | 5   |
| Rhodocyclaceae bacterium Paddy- | cytochrome C                                                 | 33  |
| Rhodocyclaceae bacterium Paddy- | cytochrome C552                                              | 7   |
| Rhodocyclaceae bacterium Paddy- | division/cell wall cluster transcriptional repressor MraZ    | 3   |
| Rhodocyclaceae bacterium Paddy- | electron transporter RnfB                                    | 8   |
| Rhodocyclaceae bacterium Paddy- | exosortase B                                                 | 4   |
| Rhodocyclaceae bacterium Paddy- | Fe(3+) ABC transporter substrate-binding protein             | 4   |

|                                 |                                                                                                   |     |
|---------------------------------|---------------------------------------------------------------------------------------------------|-----|
| Rhodocyclaceae bacterium Paddy- | glutathione peroxidase                                                                            | 2   |
| Rhodocyclaceae bacterium Paddy- | glycosyl transferase                                                                              | 2   |
| Rhodocyclaceae bacterium Paddy- | glycosyl transferase family 1                                                                     | 2   |
| Rhodocyclaceae bacterium Paddy- | GntR family transcriptional regulator                                                             | 5   |
| Rhodocyclaceae bacterium Paddy- | heme ABC transporter permease                                                                     | 13  |
| Rhodocyclaceae bacterium Paddy- | homoserine dehydrogenase                                                                          | 5   |
| Rhodocyclaceae bacterium Paddy- | hypothetical protein                                                                              | 100 |
| Rhodocyclaceae bacterium Paddy- | imidazole glycerol phosphate synthase subunit HisF                                                | 23  |
| Rhodocyclaceae bacterium Paddy- | integrase                                                                                         | 5   |
| Rhodocyclaceae bacterium Paddy- | malate synthase A                                                                                 | 11  |
| Rhodocyclaceae bacterium Paddy- | metal-binding protein                                                                             | 3   |
| Rhodocyclaceae bacterium Paddy- | molybdopterin-guanine dinucleotide biosynthesis protein MobB                                      | 10  |
| Rhodocyclaceae bacterium Paddy- | N-ethylmeline chlorohydrolase                                                                     | 1   |
| Rhodocyclaceae bacterium Paddy- | NADH:flavin oxidoreductase                                                                        | 2   |
| Rhodocyclaceae bacterium Paddy- | oligoribonuclease                                                                                 | 14  |
| Rhodocyclaceae bacterium Paddy- | peptidase M48 family protein                                                                      | 15  |
| Rhodocyclaceae bacterium Paddy- | peroxidase                                                                                        | 328 |
| Rhodocyclaceae bacterium Paddy- | phosphate acyltransferase                                                                         | 4   |
| Rhodocyclaceae bacterium Paddy- | phosphate import ATP-binding protein PstB                                                         | 8   |
| Rhodocyclaceae bacterium Paddy- | phosphatidylserine decarboxylase                                                                  | 3   |
| Rhodocyclaceae bacterium Paddy- | phospho-N-acetylmuramoyl-pentapeptide-transferase                                                 | 12  |
| Rhodocyclaceae bacterium Paddy- | phosphoglyceromutase                                                                              | 4   |
| Rhodocyclaceae bacterium Paddy- | phosphoglycolate phosphatase                                                                      | 6   |
| Rhodocyclaceae bacterium Paddy- | phosphoribosylaminoimidazole carboxylase                                                          | 2   |
| Rhodocyclaceae bacterium Paddy- | polysaccharide export protein EpsE                                                                | 4   |
| Rhodocyclaceae bacterium Paddy- | rRNA helicase                                                                                     | 3   |
| Rhodocyclaceae bacterium Paddy- | septum formation inhibitor Maf                                                                    | 2   |
| Rhodocyclaceae bacterium Paddy- | succinyl-CoA synthetase subunit beta                                                              | 6   |
| Rhodocyclaceae bacterium Paddy- | sulfate ABC transporter substrate-binding protein                                                 | 4   |
| Rhodocyclaceae bacterium Paddy- | sulfurtransferase                                                                                 | 11  |
| Rhodocyclaceae bacterium Paddy- | thiol:disulfide interchange protein                                                               | 10  |
| Rhodocyclaceae bacterium Paddy- | thiosulfohydrolase SoxB                                                                           | 3   |
| Rhodocyclaceae bacterium Paddy- | threonine synthase                                                                                | 8   |
| Rhodocyclaceae bacterium Paddy- | transcriptional regulator                                                                         | 12  |
| Rhodocyclaceae bacterium Paddy- | tRNA(5-methylaminomethyl-2-thiouridine)-methyltransferase                                         | 14  |
| Rhodocyclaceae bacterium Paddy- | two-component system response regulator                                                           | 18  |
| Rhodocyclaceae bacterium Paddy- | two-component system response regulator protein-glutamate methyltransferase                       | 4   |
| Rhodocyclaceae bacterium Paddy- | undecaprenyl-phosphate glucose phosphotransferase                                                 | 6   |
| Sulfuritalea hydrogenivorans    | (2Fe-2S) ferredoxin                                                                               | 26  |
| Sulfuritalea hydrogenivorans    | (2Fe-2S)-binding protein                                                                          | 18  |
| Sulfuritalea hydrogenivorans    | (Fe-S)-binding protein                                                                            | 3   |
| Sulfuritalea hydrogenivorans    | (Fe-S)-cluster assembly protein                                                                   | 8   |
| Sulfuritalea hydrogenivorans    | 1-(5-phosphoribosyl)-5-((5-phosphoribosylamino)methylideneamino)imidazole-4-carboxamide isomerase | 20  |
| Sulfuritalea hydrogenivorans    | 1-deoxy-D-xylulose-5-phosphate reductoisomerase                                                   | 6   |
| Sulfuritalea hydrogenivorans    | 16S rRNA (cytosine(1402)-N(4))-methyltransferase                                                  | 1   |
| Sulfuritalea hydrogenivorans    | 16S rRNA (uracil(1498)-N(3))-methyltransferase                                                    | 4   |
| Sulfuritalea hydrogenivorans    | 16S rRNA maturation RNase YbeY                                                                    | 3   |
| Sulfuritalea hydrogenivorans    | 2-C-methyl-D-erythritol 4-phosphate cytidylyltransferase                                          | 16  |
| Sulfuritalea hydrogenivorans    | 2-hydroxy-acid oxidase                                                                            | 8   |
| Sulfuritalea hydrogenivorans    | 2-hydroxyacid dehydrogenase                                                                       | 6   |
| Sulfuritalea hydrogenivorans    | 2-hydroxyhepta-2,4-diene-1,7-dioate isomerase                                                     | 3   |
| Sulfuritalea hydrogenivorans    | 2-octaprenyl-3-methyl-6-methoxy-1,4-benzoquinol hydroxylase                                       | 8   |
| Sulfuritalea hydrogenivorans    | 2-oxoglutarate dehydrogenase subunit E1                                                           | 4   |
| Sulfuritalea hydrogenivorans    | 23S rRNA methyltransferase                                                                        | 10  |
| Sulfuritalea hydrogenivorans    | 3-dehydroquinate synthase                                                                         | 14  |
| Sulfuritalea hydrogenivorans    | 3-isopropylmalate dehydratase large subunit                                                       | 16  |
| Sulfuritalea hydrogenivorans    | 3-mercaptopyruvate sulfurtransferase                                                              | 6   |
| Sulfuritalea hydrogenivorans    | 3-methyl-2-oxobutanoate hydroxymethyltransferase                                                  | 5   |
| Sulfuritalea hydrogenivorans    | 3-oxoadipate enol-lactonase                                                                       | 7   |
| Sulfuritalea hydrogenivorans    | 3-phosphoshikimate 1-carboxyvinyltransferase                                                      | 3   |
| Sulfuritalea hydrogenivorans    | 3,4-dihydroxy-2-butanone-4-phosphate synthase                                                     | 3   |
| Sulfuritalea hydrogenivorans    | 3',5'-cyclic-nucleotide phosphodiesterase                                                         | 4   |
| Sulfuritalea hydrogenivorans    | 30S ribosomal protein S1                                                                          | 48  |
| Sulfuritalea hydrogenivorans    | 30S ribosomal protein S14                                                                         | 22  |
| Sulfuritalea hydrogenivorans    | 30S ribosomal protein S16                                                                         | 20  |
| Sulfuritalea hydrogenivorans    | 30S ribosomal protein S17                                                                         | 7   |
| Sulfuritalea hydrogenivorans    | 30S ribosomal protein S19                                                                         | 7   |
| Sulfuritalea hydrogenivorans    | 30S ribosomal protein S20                                                                         | 16  |
| Sulfuritalea hydrogenivorans    | 30S ribosomal protein S7                                                                          | 17  |
| Sulfuritalea hydrogenivorans    | 30S ribosomal protein S8                                                                          | 22  |
| Sulfuritalea hydrogenivorans    | 30S ribosomal protein S9                                                                          | 41  |
| Sulfuritalea hydrogenivorans    | 4-hydroxy-3-methylbut-2-en-1-yl diphosphate synthase                                              | 4   |
| Sulfuritalea hydrogenivorans    | 4-hydroxy-tetrahydrodipicolinate reductase                                                        | 8   |
| Sulfuritalea hydrogenivorans    | 4-hydroxy-tetrahydrodipicolinate synthase                                                         | 8   |

|                              |                                                                  |     |
|------------------------------|------------------------------------------------------------------|-----|
| Sulfuritalea hydrogenivorans | 4'-phosphopantetheinyl transferase                               | 3   |
| Sulfuritalea hydrogenivorans | 4Fe-4S ferredoxin                                                | 80  |
| Sulfuritalea hydrogenivorans | 5'-methylthioadenosine phosphorylase                             | 8   |
| Sulfuritalea hydrogenivorans | 50S ribosomal protein L1                                         | 69  |
| Sulfuritalea hydrogenivorans | 50S ribosomal protein L10                                        | 24  |
| Sulfuritalea hydrogenivorans | 50S ribosomal protein L11                                        | 8   |
| Sulfuritalea hydrogenivorans | 50S ribosomal protein L14                                        | 6   |
| Sulfuritalea hydrogenivorans | 50S ribosomal protein L15                                        | 17  |
| Sulfuritalea hydrogenivorans | 50S ribosomal protein L17                                        | 13  |
| Sulfuritalea hydrogenivorans | 50S ribosomal protein L19                                        | 5   |
| Sulfuritalea hydrogenivorans | 50S ribosomal protein L21                                        | 16  |
| Sulfuritalea hydrogenivorans | 50S ribosomal protein L22                                        | 1   |
| Sulfuritalea hydrogenivorans | 50S ribosomal protein L24                                        | 6   |
| Sulfuritalea hydrogenivorans | 50S ribosomal protein L25                                        | 7   |
| Sulfuritalea hydrogenivorans | 50S ribosomal protein L28                                        | 9   |
| Sulfuritalea hydrogenivorans | 50S ribosomal protein L29                                        | 8   |
| Sulfuritalea hydrogenivorans | 50S ribosomal protein L30                                        | 4   |
| Sulfuritalea hydrogenivorans | 50S ribosomal protein L31                                        | 8   |
| Sulfuritalea hydrogenivorans | 50S ribosomal protein L35                                        | 5   |
| Sulfuritalea hydrogenivorans | 50S ribosomal protein L4                                         | 59  |
| Sulfuritalea hydrogenivorans | 50S ribosomal protein L5                                         | 5   |
| Sulfuritalea hydrogenivorans | 50S ribosomal protein L6                                         | 22  |
| Sulfuritalea hydrogenivorans | 50S rRNA methyltransferase                                       | 8   |
| Sulfuritalea hydrogenivorans | 6-phosphofructokinase                                            | 10  |
| Sulfuritalea hydrogenivorans | 7-cyano-7-deazaguanine reductase                                 | 6   |
| Sulfuritalea hydrogenivorans | ABC transporter                                                  | 70  |
| Sulfuritalea hydrogenivorans | ABC transporter ATP-binding protein                              | 16  |
| Sulfuritalea hydrogenivorans | ABC transporter permease                                         | 29  |
| Sulfuritalea hydrogenivorans | ABC-ATPase UvrA                                                  | 12  |
| Sulfuritalea hydrogenivorans | acetolactate synthase 3 catalytic subunit                        | 11  |
| Sulfuritalea hydrogenivorans | acetyl-CoA carboxylase subunit beta                              | 5   |
| Sulfuritalea hydrogenivorans | acetyl-CoA synthetase                                            | 6   |
| Sulfuritalea hydrogenivorans | acetyl-coenzyme A synthetase                                     | 15  |
| Sulfuritalea hydrogenivorans | acetylneuraminic acid synthetase                                 | 6   |
| Sulfuritalea hydrogenivorans | acetylmethionine aminotransferase                                | 15  |
| Sulfuritalea hydrogenivorans | aconitate hydratase B                                            | 5   |
| Sulfuritalea hydrogenivorans | acyl-CoA thioesterase                                            | 9   |
| Sulfuritalea hydrogenivorans | adenosylmethionine--8-amino-7-oxononanoate aminotransferase BioA | 4   |
| Sulfuritalea hydrogenivorans | adenylosuccinate lyase                                           | 11  |
| Sulfuritalea hydrogenivorans | adenylosuccinate synthase                                        | 4   |
| Sulfuritalea hydrogenivorans | adenylyl cyclase                                                 | 5   |
| Sulfuritalea hydrogenivorans | adenylyl-sulfate reductase                                       | 393 |
| Sulfuritalea hydrogenivorans | ADP-heptose synthase                                             | 21  |
| Sulfuritalea hydrogenivorans | AI-2E family transporter                                         | 2   |
| Sulfuritalea hydrogenivorans | aldehyde ferredoxin oxidoreductase                               | 3   |
| Sulfuritalea hydrogenivorans | alkyl hydroperoxide reductase                                    | 16  |
| Sulfuritalea hydrogenivorans | alpha-glucan phosphorylase                                       | 3   |
| Sulfuritalea hydrogenivorans | alpha/beta hydrolase                                             | 11  |
| Sulfuritalea hydrogenivorans | amidophosphoribosyltransferase                                   | 7   |
| Sulfuritalea hydrogenivorans | amino acid dehydrogenase                                         | 8   |
| Sulfuritalea hydrogenivorans | aminoacyl-tRNA deacylase                                         | 8   |
| Sulfuritalea hydrogenivorans | aminoglycoside phosphotransferase                                | 7   |
| Sulfuritalea hydrogenivorans | aminotransferase                                                 | 5   |
| Sulfuritalea hydrogenivorans | AMP-dependent synthetase                                         | 4   |
| Sulfuritalea hydrogenivorans | anthranilate phosphoribosyltransferase                           | 6   |
| Sulfuritalea hydrogenivorans | anthranilate synthase component I                                | 10  |
| Sulfuritalea hydrogenivorans | anti-sigma-factor antagonist                                     | 16  |
| Sulfuritalea hydrogenivorans | arabinose-5-phosphate isomerase                                  | 6   |
| Sulfuritalea hydrogenivorans | arginine--tRNA ligase                                            | 10  |
| Sulfuritalea hydrogenivorans | argininosuccinate lyase                                          | 7   |
| Sulfuritalea hydrogenivorans | arginyl-tRNA-protein transferase                                 | 3   |
| Sulfuritalea hydrogenivorans | aromatic amino acid aminotransferase                             | 18  |
| Sulfuritalea hydrogenivorans | arsenate reductase                                               | 14  |
| Sulfuritalea hydrogenivorans | aspartate--tRNA ligase                                           | 9   |
| Sulfuritalea hydrogenivorans | ATP F0F1 synthase subunit gamma                                  | 8   |
| Sulfuritalea hydrogenivorans | ATP phosphoribosyltransferase                                    | 8   |
| Sulfuritalea hydrogenivorans | ATP synthase F0F1 subunit C                                      | 27  |
| Sulfuritalea hydrogenivorans | ATP--cobalamin adenosyltransferase                               | 3   |
| Sulfuritalea hydrogenivorans | ATP-dependent Clp protease ATP-binding subunit ClpA              | 14  |
| Sulfuritalea hydrogenivorans | ATP-dependent Clp protease proteolytic subunit                   | 6   |
| Sulfuritalea hydrogenivorans | ATP-dependent DNA helicase RecQ                                  | 2   |
| Sulfuritalea hydrogenivorans | ATP-dependent DNA helicase RuvB                                  | 6   |
| Sulfuritalea hydrogenivorans | ATPase                                                           | 1   |
| Sulfuritalea hydrogenivorans | ATPase AAA                                                       | 5   |

|                              |                                                                                                                      |     |
|------------------------------|----------------------------------------------------------------------------------------------------------------------|-----|
| Sulfuritalea hydrogenivorans | BAX inhibitor protein                                                                                                | 71  |
| Sulfuritalea hydrogenivorans | benzoate transporter                                                                                                 | 22  |
| Sulfuritalea hydrogenivorans | benzoyl-CoA oxygenase                                                                                                | 3   |
| Sulfuritalea hydrogenivorans | benzoyl-CoA-dihydrodiol lyase                                                                                        | 7   |
| Sulfuritalea hydrogenivorans | beta-hexosaminidase                                                                                                  | 2   |
| Sulfuritalea hydrogenivorans | beta-ketoacyl-ACP reductase                                                                                          | 3   |
| Sulfuritalea hydrogenivorans | bifunctional 5,10-methylene-tetrahydrofolate dehydrogenase/5,10-methylene-tetrahydrofolate cyclohydrolase            | 8   |
| Sulfuritalea hydrogenivorans | bifunctional diaminohydroxyphosphoribosylaminopyrimidine deaminase/5-amino-6-(5-phosphoribosylamino)uracil reductase | 4   |
| Sulfuritalea hydrogenivorans | bifunctional isocitrate dehydrogenase kinase/phosphatase                                                             | 3   |
| Sulfuritalea hydrogenivorans | bifunctional N-acetylglucosamine-1-phosphate uridylyltransferase/glucosamine-1-phosphate acetyltransferase           | 15  |
| Sulfuritalea hydrogenivorans | bifunctional phosphoribosylaminoimidazolecarboxamide formyltransferase/inosine monophosphate cyclohydrolase          | 5   |
| Sulfuritalea hydrogenivorans | bifunctional riboflavin kinase/FMN adenyllyltransferase                                                              | 5   |
| Sulfuritalea hydrogenivorans | biopolymer transporter ExbD                                                                                          | 3   |
| Sulfuritalea hydrogenivorans | biotin synthase                                                                                                      | 7   |
| Sulfuritalea hydrogenivorans | biotin--[acetyl-CoA-carboxylase] ligase                                                                              | 3   |
| Sulfuritalea hydrogenivorans | bis(5'-nucleosyl)-tetrphosphatase (symmetrical)                                                                      | 5   |
| Sulfuritalea hydrogenivorans | BolA family transcriptional regulator                                                                                | 11  |
| Sulfuritalea hydrogenivorans | branched chain amino acid ABC transporter substrate-binding protein                                                  | 13  |
| Sulfuritalea hydrogenivorans | branched-chain alpha-keto acid dehydrogenase subunit E2                                                              | 381 |
| Sulfuritalea hydrogenivorans | c-type cytochrome biogenesis protein CcmI                                                                            | 9   |
| Sulfuritalea hydrogenivorans | C4-dicarboxylate ABC transporter                                                                                     | 21  |
| Sulfuritalea hydrogenivorans | carbonate dehydratase                                                                                                | 1   |
| Sulfuritalea hydrogenivorans | cation acetate symporter                                                                                             | 2   |
| Sulfuritalea hydrogenivorans | cation diffusion facilitator transporter                                                                             | 5   |
| Sulfuritalea hydrogenivorans | cation tolerance protein CutA                                                                                        | 5   |
| Sulfuritalea hydrogenivorans | cation transporter                                                                                                   | 13  |
| Sulfuritalea hydrogenivorans | ccb3-type cytochrome c oxidase subunit II                                                                            | 5   |
| Sulfuritalea hydrogenivorans | CBS domain-containing protein                                                                                        | 4   |
| Sulfuritalea hydrogenivorans | cell division protein                                                                                                | 3   |
| Sulfuritalea hydrogenivorans | cell division protein FtsA                                                                                           | 8   |
| Sulfuritalea hydrogenivorans | cell division protein FtsH                                                                                           | 7   |
| Sulfuritalea hydrogenivorans | cell division protein FtsK                                                                                           | 7   |
| Sulfuritalea hydrogenivorans | cell division protein FtsZ                                                                                           | 7   |
| Sulfuritalea hydrogenivorans | cell shape determination protein CcmA                                                                                | 40  |
| Sulfuritalea hydrogenivorans | channel protein TolC                                                                                                 | 6   |
| Sulfuritalea hydrogenivorans | chemotaxis protein CheA                                                                                              | 20  |
| Sulfuritalea hydrogenivorans | chemotaxis protein CheY                                                                                              | 19  |
| Sulfuritalea hydrogenivorans | chemotaxis protein CheZ                                                                                              | 13  |
| Sulfuritalea hydrogenivorans | chemotaxis response regulator protein-glutamate methyltransferase                                                    | 6   |
| Sulfuritalea hydrogenivorans | chromosome partitioning protein ParB                                                                                 | 2   |
| Sulfuritalea hydrogenivorans | chromosome segregation protein SMC                                                                                   | 8   |
| Sulfuritalea hydrogenivorans | cobalamin biosynthesis protein                                                                                       | 3   |
| Sulfuritalea hydrogenivorans | cobyrimic acid a,c-diamide synthase                                                                                  | 11  |
| Sulfuritalea hydrogenivorans | competence protein ComL                                                                                              | 6   |
| Sulfuritalea hydrogenivorans | coproporphyrinogen III oxidase                                                                                       | 21  |
| Sulfuritalea hydrogenivorans | Crp/Fnr family transcriptional regulator                                                                             | 4   |
| Sulfuritalea hydrogenivorans | cupin                                                                                                                | 2   |
| Sulfuritalea hydrogenivorans | cyclic pyranopterin monophosphate synthase accessory protein                                                         | 4   |
| Sulfuritalea hydrogenivorans | cysteine desulfurase                                                                                                 | 104 |
| Sulfuritalea hydrogenivorans | cysteine synthase                                                                                                    | 9   |
| Sulfuritalea hydrogenivorans | cytochrome B561                                                                                                      | 26  |
| Sulfuritalea hydrogenivorans | cytochrome C                                                                                                         | 35  |
| Sulfuritalea hydrogenivorans | cytochrome C biogenesis protein CcmE                                                                                 | 9   |
| Sulfuritalea hydrogenivorans | cytochrome C oxidase subunit I                                                                                       | 3   |
| Sulfuritalea hydrogenivorans | cytochrome C550                                                                                                      | 13  |
| Sulfuritalea hydrogenivorans | cytochrome Cbb3                                                                                                      | 16  |
| Sulfuritalea hydrogenivorans | cytosol aminopeptidase                                                                                               | 7   |
| Sulfuritalea hydrogenivorans | D-fructose-6-phosphate amidotransferase                                                                              | 4   |
| Sulfuritalea hydrogenivorans | D-glycerate dehydrogenase                                                                                            | 5   |
| Sulfuritalea hydrogenivorans | D-hexose-6-phosphate mutarotase                                                                                      | 19  |
| Sulfuritalea hydrogenivorans | damage-inducible protein CinA                                                                                        | 2   |
| Sulfuritalea hydrogenivorans | deacetylase                                                                                                          | 9   |
| Sulfuritalea hydrogenivorans | DEAD/DEAH box helicase                                                                                               | 1   |
| Sulfuritalea hydrogenivorans | dehydrogenase                                                                                                        | 11  |
| Sulfuritalea hydrogenivorans | delta-aminolevulinic acid dehydratase                                                                                | 10  |
| Sulfuritalea hydrogenivorans | denitrification system component NirT                                                                                | 83  |
| Sulfuritalea hydrogenivorans | deoxyguanosinetriphosphate triphosphohydrolase                                                                       | 6   |
| Sulfuritalea hydrogenivorans | dethiobiotin synthase                                                                                                | 4   |
| Sulfuritalea hydrogenivorans | diaminopimelate epimerase                                                                                            | 11  |
| Sulfuritalea hydrogenivorans | dienelactone hydrolase                                                                                               | 2   |
| Sulfuritalea hydrogenivorans | diguanylate cyclase                                                                                                  | 9   |
| Sulfuritalea hydrogenivorans | dihydroliipoamide dehydrogenase                                                                                      | 23  |
| Sulfuritalea hydrogenivorans | dihydroorotase                                                                                                       | 13  |
| Sulfuritalea hydrogenivorans | dihydroxy-acid dehydratase                                                                                           | 5   |



|                              |                                                              |     |
|------------------------------|--------------------------------------------------------------|-----|
| Sulfuritalea hydrogenivorans | disulfide bond formation protein                             | 5   |
| Sulfuritalea hydrogenivorans | DMSO reductase                                               | 3   |
| Sulfuritalea hydrogenivorans | DNA gyrase subunit B                                         | 2   |
| Sulfuritalea hydrogenivorans | DNA helicase                                                 | 2   |
| Sulfuritalea hydrogenivorans | DNA mismatch repair protein MutS                             | 2   |
| Sulfuritalea hydrogenivorans | DNA polymerase III subunit alpha                             | 4   |
| Sulfuritalea hydrogenivorans | DNA polymerase III subunit beta                              | 8   |
| Sulfuritalea hydrogenivorans | DNA polymerase III subunit epsilon                           | 7   |
| Sulfuritalea hydrogenivorans | DNA processing protein DprA                                  | 2   |
| Sulfuritalea hydrogenivorans | DNA recombination/repair protein RecA                        | 6   |
| Sulfuritalea hydrogenivorans | DNA repair protein RecN                                      | 6   |
| Sulfuritalea hydrogenivorans | DNA-binding protein                                          | 10  |
| Sulfuritalea hydrogenivorans | DNA-binding response regulator                               | 33  |
| Sulfuritalea hydrogenivorans | DNA-directed RNA polymerase subunit beta                     | 14  |
| Sulfuritalea hydrogenivorans | DNA-directed RNA polymerase subunit beta'                    | 12  |
| Sulfuritalea hydrogenivorans | DNA-formamidopyrimidine glycosylase                          | 6   |
| Sulfuritalea hydrogenivorans | DnaA regulatory inactivator Hda                              | 4   |
| Sulfuritalea hydrogenivorans | electron transport complex subunit A                         | 7   |
| Sulfuritalea hydrogenivorans | electron transporter RnfA                                    | 3   |
| Sulfuritalea hydrogenivorans | elongation factor G                                          | 7   |
| Sulfuritalea hydrogenivorans | elongation factor P                                          | 3   |
| Sulfuritalea hydrogenivorans | enoyl-CoA hydratase                                          | 5   |
| Sulfuritalea hydrogenivorans | epoxyqueuosine reductase                                     | 7   |
| Sulfuritalea hydrogenivorans | erythromycin biosynthesis sensory transduction protein eryC1 | 2   |
| Sulfuritalea hydrogenivorans | EVE domain-containing protein                                | 5   |
| Sulfuritalea hydrogenivorans | excinuclease ABC subunit A                                   | 12  |
| Sulfuritalea hydrogenivorans | exodeoxyribonuclease III                                     | 5   |
| Sulfuritalea hydrogenivorans | exodeoxyribonuclease VII large subunit                       | 6   |
| Sulfuritalea hydrogenivorans | exopolyphosphatase                                           | 2   |
| Sulfuritalea hydrogenivorans | Fe-S cluster assembly transcriptional regulator IscR         | 11  |
| Sulfuritalea hydrogenivorans | Fe-S cluster protein                                         | 6   |
| Sulfuritalea hydrogenivorans | Fe-S oxidoreductase                                          | 151 |
| Sulfuritalea hydrogenivorans | Fe(3+) ABC transporter substrate-binding protein             | 12  |
| Sulfuritalea hydrogenivorans | ferredoxin                                                   | 21  |
| Sulfuritalea hydrogenivorans | ferredoxin--NAD(+) reductase                                 | 3   |
| Sulfuritalea hydrogenivorans | FeS assembly protein IscX                                    | 23  |
| Sulfuritalea hydrogenivorans | flagellar basal body rod modification protein FlgD           | 25  |
| Sulfuritalea hydrogenivorans | flagellar basal body rod protein FlgF                        | 10  |
| Sulfuritalea hydrogenivorans | flagellar basal body rod protein FlgG                        | 11  |
| Sulfuritalea hydrogenivorans | flagellar biosynthesis protein FlgB                          | 20  |
| Sulfuritalea hydrogenivorans | flagellar biosynthesis protein FlgI                          | 9   |
| Sulfuritalea hydrogenivorans | flagellar biosynthesis protein FlhB                          | 3   |
| Sulfuritalea hydrogenivorans | flagellar biosynthesis regulator FlhF                        | 5   |
| Sulfuritalea hydrogenivorans | flagellar hook protein FlgK                                  | 14  |
| Sulfuritalea hydrogenivorans | flagellar hook-associated protein 3                          | 6   |
| Sulfuritalea hydrogenivorans | flagellar hook-basal body protein FlhE                       | 38  |
| Sulfuritalea hydrogenivorans | flagellar L-ring protein FlgH                                | 7   |
| Sulfuritalea hydrogenivorans | flagellar M-ring protein FlhF                                | 8   |
| Sulfuritalea hydrogenivorans | flagellar motor protein MotA                                 | 11  |
| Sulfuritalea hydrogenivorans | flagellar motor protein MotB                                 | 4   |
| Sulfuritalea hydrogenivorans | flagellar motor switch protein FlhM                          | 4   |
| Sulfuritalea hydrogenivorans | flagellar motor switch protein G                             | 8   |
| Sulfuritalea hydrogenivorans | FmdB family transcriptional regulator                        | 10  |
| Sulfuritalea hydrogenivorans | formate dehydrogenase                                        | 18  |
| Sulfuritalea hydrogenivorans | fructose 1,6-bisphosphatase                                  | 43  |
| Sulfuritalea hydrogenivorans | fructose-bisphosphate aldolase                               | 4   |
| Sulfuritalea hydrogenivorans | fumarate reductase                                           | 9   |
| Sulfuritalea hydrogenivorans | glucose-1-phosphate adenylyltransferase                      | 14  |
| Sulfuritalea hydrogenivorans | glucose-6-phosphate isomerase                                | 15  |
| Sulfuritalea hydrogenivorans | glutamate 5-kinase                                           | 2   |
| Sulfuritalea hydrogenivorans | glutamate synthase                                           | 54  |
| Sulfuritalea hydrogenivorans | glutamate--cysteine ligase                                   | 3   |
| Sulfuritalea hydrogenivorans | glutamate-1-semialdehyde aminotransferase                    | 7   |
| Sulfuritalea hydrogenivorans | glutamine synthetase                                         | 12  |
| Sulfuritalea hydrogenivorans | glutamine--fructose-6-phosphate aminotransferase             | 15  |
| Sulfuritalea hydrogenivorans | glutamine--tRNA ligase                                       | 5   |
| Sulfuritalea hydrogenivorans | glutamine-synthetase adenylyltransferase                     | 2   |
| Sulfuritalea hydrogenivorans | glutamyl-tRNA amidotransferase                               | 13  |
| Sulfuritalea hydrogenivorans | glutamyl-tRNA reductase                                      | 9   |
| Sulfuritalea hydrogenivorans | glycerol-3-phosphate transporter permease                    | 1   |
| Sulfuritalea hydrogenivorans | glycine cleavage system protein R                            | 5   |
| Sulfuritalea hydrogenivorans | glycogen synthase                                            | 3   |
| Sulfuritalea hydrogenivorans | glycolate oxidase                                            | 17  |
| Sulfuritalea hydrogenivorans | glycoside hydrolase                                          | 2   |

|                              |                                                            |      |
|------------------------------|------------------------------------------------------------|------|
| Sulfuritalea hydrogenivorans | GMP synthetase                                             | 2    |
| Sulfuritalea hydrogenivorans | GNAT family N-acetyltransferase                            | 8    |
| Sulfuritalea hydrogenivorans | GTP cyclohydrolase FolE2                                   | 39   |
| Sulfuritalea hydrogenivorans | GTP pyrophosphokinase                                      | 3    |
| Sulfuritalea hydrogenivorans | guanosine-3',5'-bis(diphosphate) 3'-pyrophosphohydrolase   | 6    |
| Sulfuritalea hydrogenivorans | guanylate cyclase                                          | 4    |
| Sulfuritalea hydrogenivorans | guanylate kinase                                           | 6    |
| Sulfuritalea hydrogenivorans | GxxExxY protein                                            | 2    |
| Sulfuritalea hydrogenivorans | haloacid dehalogenase                                      | 1    |
| Sulfuritalea hydrogenivorans | helicase                                                   | 3    |
| Sulfuritalea hydrogenivorans | heme ABC exporter ATP-binding protein CcmA                 | 9    |
| Sulfuritalea hydrogenivorans | hemerythrin                                                | 12   |
| Sulfuritalea hydrogenivorans | hemolysin D                                                | 5    |
| Sulfuritalea hydrogenivorans | heterodisulfide reductase                                  | 36   |
| Sulfuritalea hydrogenivorans | heterodisulfide reductase subunit A                        | 22   |
| Sulfuritalea hydrogenivorans | histidine kinase                                           | 12   |
| Sulfuritalea hydrogenivorans | HrcA family transcriptional regulator                      | 7    |
| Sulfuritalea hydrogenivorans | hydrogenase                                                | 12   |
| Sulfuritalea hydrogenivorans | hydrogenase 2 large subunit                                | 15   |
| Sulfuritalea hydrogenivorans | hydrogenase 2 protein HybA                                 | 16   |
| Sulfuritalea hydrogenivorans | hydrogenase expression/formation protein HypE              | 4    |
| Sulfuritalea hydrogenivorans | hydrogenase nickel incorporation protein HypA              | 4    |
| Sulfuritalea hydrogenivorans | hydroxylase                                                | 4    |
| Sulfuritalea hydrogenivorans | hydroxymethylbilane synthase                               | 4    |
| Sulfuritalea hydrogenivorans | hydroxymethylglutaryl-CoA lyase                            | 6    |
| Sulfuritalea hydrogenivorans | hypothetical protein                                       | 2110 |
| Sulfuritalea hydrogenivorans | hypothetical protein, partial                              | 8    |
| Sulfuritalea hydrogenivorans | imidazoleglycerol-phosphate dehydratase                    | 10   |
| Sulfuritalea hydrogenivorans | indolepyruvate ferredoxin oxidoreductase                   | 7    |
| Sulfuritalea hydrogenivorans | inosine-5-monophosphate dehydrogenase                      | 27   |
| Sulfuritalea hydrogenivorans | insertase                                                  | 12   |
| Sulfuritalea hydrogenivorans | integrase                                                  | 8    |
| Sulfuritalea hydrogenivorans | iron-sulfur cluster insertion protein ErpA                 | 40   |
| Sulfuritalea hydrogenivorans | isocitrate dehydrogenase                                   | 20   |
| Sulfuritalea hydrogenivorans | isocitrate lyase                                           | 5    |
| Sulfuritalea hydrogenivorans | isoleucine--tRNA ligase                                    | 5    |
| Sulfuritalea hydrogenivorans | ketol-acid reductoisomerase                                | 6    |
| Sulfuritalea hydrogenivorans | leucine--tRNA ligase                                       | 4    |
| Sulfuritalea hydrogenivorans | leucyl/phenylalanyl-tRNA--protein transferase              | 3    |
| Sulfuritalea hydrogenivorans | lipoprotein                                                | 9    |
| Sulfuritalea hydrogenivorans | long-chain-fatty-acid--CoA ligase                          | 21   |
| Sulfuritalea hydrogenivorans | magnesium and cobalt efflux protein CorC                   | 5    |
| Sulfuritalea hydrogenivorans | magnesium transporter                                      | 2    |
| Sulfuritalea hydrogenivorans | malate dehydrogenase                                       | 24   |
| Sulfuritalea hydrogenivorans | malate synthase A                                          | 13   |
| Sulfuritalea hydrogenivorans | malic enzyme                                               | 12   |
| Sulfuritalea hydrogenivorans | maltodextrin phosphorylase                                 | 5    |
| Sulfuritalea hydrogenivorans | MarR family transcriptional regulator                      | 4    |
| Sulfuritalea hydrogenivorans | MBL fold metallo-hydrolase                                 | 11   |
| Sulfuritalea hydrogenivorans | membrane protein                                           | 39   |
| Sulfuritalea hydrogenivorans | metal ABC transporter permease                             | 19   |
| Sulfuritalea hydrogenivorans | metal-binding protein                                      | 6    |
| Sulfuritalea hydrogenivorans | methionine synthase                                        | 6    |
| Sulfuritalea hydrogenivorans | methylmalonyl-CoA carboxyltransferase                      | 2    |
| Sulfuritalea hydrogenivorans | methyltransferase                                          | 4    |
| Sulfuritalea hydrogenivorans | microcin ABC transporter ATP-binding protein               | 6    |
| Sulfuritalea hydrogenivorans | molecular chaperone DnaJ                                   | 5    |
| Sulfuritalea hydrogenivorans | molecular chaperone DnaK                                   | 10   |
| Sulfuritalea hydrogenivorans | molecular chaperone GroEL                                  | 147  |
| Sulfuritalea hydrogenivorans | molecular chaperone HscA                                   | 5    |
| Sulfuritalea hydrogenivorans | molecular chaperone SurA                                   | 4    |
| Sulfuritalea hydrogenivorans | molybdopterin biosynthesis protein MoeB                    | 12   |
| Sulfuritalea hydrogenivorans | molybdopterin oxidoreductase                               | 62   |
| Sulfuritalea hydrogenivorans | monofunctional biosynthetic peptidoglycan transglycosylase | 2    |
| Sulfuritalea hydrogenivorans | multidrug efflux RND transporter permease subunit          | 3    |
| Sulfuritalea hydrogenivorans | multidrug transporter AcrB                                 | 31   |
| Sulfuritalea hydrogenivorans | murein transglycosylase                                    | 8    |
| Sulfuritalea hydrogenivorans | N-acetyl-gamma-glutamyl-phosphate reductase                | 8    |
| Sulfuritalea hydrogenivorans | N-acetylglutamate synthase                                 | 14   |
| Sulfuritalea hydrogenivorans | N-acetylmuramoyl-L-alanine amidase                         | 10   |
| Sulfuritalea hydrogenivorans | N5-carboxyaminoimidazole ribonucleotide mutase             | 6    |
| Sulfuritalea hydrogenivorans | NAD-dependent dehydratase                                  | 27   |
| Sulfuritalea hydrogenivorans | NADH dehydrogenase                                         | 39   |
| Sulfuritalea hydrogenivorans | NADH:ubiquinone oxidoreductase                             | 1    |

|                              |                                                         |     |
|------------------------------|---------------------------------------------------------|-----|
| Sulfititalea hydrogenivorans | NADH:ubiquinone oxidoreductase subunit A                | 12  |
| Sulfititalea hydrogenivorans | NADH:ubiquinone oxidoreductase subunit H                | 14  |
| Sulfititalea hydrogenivorans | NADH:ubiquinone oxidoreductase subunit J                | 13  |
| Sulfititalea hydrogenivorans | NADH:ubiquinone oxidoreductase subunit L                | 11  |
| Sulfititalea hydrogenivorans | NADH:ubiquinone oxidoreductase subunit M                | 14  |
| Sulfititalea hydrogenivorans | NADH:ubiquinone oxidoreductase subunit N                | 13  |
| Sulfititalea hydrogenivorans | NADP oxidoreductase                                     | 6   |
| Sulfititalea hydrogenivorans | Nif3-like dinuclear metal center hexameric protein      | 5   |
| Sulfititalea hydrogenivorans | nitrate reductase                                       | 109 |
| Sulfititalea hydrogenivorans | nitrate reductase catalytic subunit                     | 15  |
| Sulfititalea hydrogenivorans | nitrogen assimilation regulatory protein NtrX           | 3   |
| Sulfititalea hydrogenivorans | nitrogen regulatory protein P-II 1                      | 33  |
| Sulfititalea hydrogenivorans | non-canonical purine NTP pyrophosphatase                | 3   |
| Sulfititalea hydrogenivorans | NrdR family transcriptional regulator                   | 7   |
| Sulfititalea hydrogenivorans | nucleoid-associated protein                             | 17  |
| Sulfititalea hydrogenivorans | nucleoside recognition domain-containing protein        | 6   |
| Sulfititalea hydrogenivorans | nucleotide-binding protein                              | 11  |
| Sulfititalea hydrogenivorans | NUDIX hydrolase                                         | 16  |
| Sulfititalea hydrogenivorans | O-acetylhomoserine aminocarboxypropyltransferase        | 9   |
| Sulfititalea hydrogenivorans | outer membrane lipoprotein carrier protein LolA         | 27  |
| Sulfititalea hydrogenivorans | outer membrane lipoprotein OmlA                         | 14  |
| Sulfititalea hydrogenivorans | oxidoreductase                                          | 3   |
| Sulfititalea hydrogenivorans | PAS domain-containing sensor histidine kinase           | 4   |
| Sulfititalea hydrogenivorans | penicillin-binding protein                              | 1   |
| Sulfititalea hydrogenivorans | peptidase M16                                           | 3   |
| Sulfititalea hydrogenivorans | peptidase M17                                           | 6   |
| Sulfititalea hydrogenivorans | peptidase M20                                           | 3   |
| Sulfititalea hydrogenivorans | peptidase M23                                           | 22  |
| Sulfititalea hydrogenivorans | peptidase M48                                           | 12  |
| Sulfititalea hydrogenivorans | peptidase PMbA                                          | 5   |
| Sulfititalea hydrogenivorans | peptidase S16                                           | 7   |
| Sulfititalea hydrogenivorans | peptidase S41                                           | 11  |
| Sulfititalea hydrogenivorans | peptidase S49                                           | 19  |
| Sulfititalea hydrogenivorans | peptide chain release factor 1                          | 11  |
| Sulfititalea hydrogenivorans | peptide chain release factor 2                          | 9   |
| Sulfititalea hydrogenivorans | peptide deformylase                                     | 1   |
| Sulfititalea hydrogenivorans | peptidylprolyl isomerase                                | 21  |
| Sulfititalea hydrogenivorans | peroxiredoxin                                           | 6   |
| Sulfititalea hydrogenivorans | phage repressor                                         | 4   |
| Sulfititalea hydrogenivorans | phage-like protein                                      | 5   |
| Sulfititalea hydrogenivorans | phenylalanine--tRNA ligase subunit beta                 | 4   |
| Sulfititalea hydrogenivorans | phosphatase                                             | 5   |
| Sulfititalea hydrogenivorans | phosphate ABC transporter permease                      | 9   |
| Sulfititalea hydrogenivorans | phosphate starvation protein PhoH                       | 7   |
| Sulfititalea hydrogenivorans | phospho-2-dehydro-3-deoxyheptonate aldolase             | 17  |
| Sulfititalea hydrogenivorans | phosphocarrier protein HPr                              | 7   |
| Sulfititalea hydrogenivorans | phosphoenolpyruvate--protein phosphotransferase         | 5   |
| Sulfititalea hydrogenivorans | phosphoglucomutase                                      | 2   |
| Sulfititalea hydrogenivorans | phosphoglucosamine mutase                               | 5   |
| Sulfititalea hydrogenivorans | phosphoglycerate kinase                                 | 16  |
| Sulfititalea hydrogenivorans | phosphoheptose isomerase                                | 8   |
| Sulfititalea hydrogenivorans | phosphohistidine phosphatase                            | 18  |
| Sulfititalea hydrogenivorans | phosphohydrolase                                        | 3   |
| Sulfititalea hydrogenivorans | phosphopantothenate synthase                            | 13  |
| Sulfititalea hydrogenivorans | phosphopyruvate hydratase                               | 11  |
| Sulfititalea hydrogenivorans | phosphoribosyl-ATP pyrophosphatase                      | 2   |
| Sulfititalea hydrogenivorans | phosphoribosylamine--glycine ligase                     | 3   |
| Sulfititalea hydrogenivorans | phosphoribosylaminoimidazole synthetase                 | 7   |
| Sulfititalea hydrogenivorans | phosphoribosylaminoimidazolesuccinocarboxamide synthase | 6   |
| Sulfititalea hydrogenivorans | phosphoribosylformylglycinamide synthase                | 5   |
| Sulfititalea hydrogenivorans | phosphoribulokinase                                     | 16  |
| Sulfititalea hydrogenivorans | phosphoserine phosphatase                               | 4   |
| Sulfititalea hydrogenivorans | PLP-dependent threonine dehydratase                     | 5   |
| Sulfititalea hydrogenivorans | poly(3-hydroxyalkanoate) polymerase                     | 8   |
| Sulfititalea hydrogenivorans | poly(A) polymerase                                      | 8   |
| Sulfititalea hydrogenivorans | polynucleotide phosphorylase/polyadenylase              | 15  |
| Sulfititalea hydrogenivorans | polyphosphate kinase                                    | 11  |
| Sulfititalea hydrogenivorans | potassium transporter                                   | 3   |
| Sulfititalea hydrogenivorans | potassium transporter peripheral membrane component     | 4   |
| Sulfititalea hydrogenivorans | potassium transporter Trk                               | 2   |
| Sulfititalea hydrogenivorans | prephenate dehydrogenase                                | 1   |
| Sulfititalea hydrogenivorans | preprotein translocase subunit SecA                     | 13  |
| Sulfititalea hydrogenivorans | preprotein translocase subunit SecD                     | 5   |
| Sulfititalea hydrogenivorans | preprotein translocase subunit SecE                     | 11  |

|                              |                                                                         |     |
|------------------------------|-------------------------------------------------------------------------|-----|
| Sulfuritalea hydrogenivorans | preprotein translocase subunit SecY                                     | 5   |
| Sulfuritalea hydrogenivorans | prolipoprotein diacylglycerol transferase                               | 5   |
| Sulfuritalea hydrogenivorans | protease modulator HflC                                                 | 11  |
| Sulfuritalea hydrogenivorans | protease modulator HflK                                                 | 6   |
| Sulfuritalea hydrogenivorans | protein disaggregation chaperone                                        | 13  |
| Sulfuritalea hydrogenivorans | protein phosphatase                                                     | 20  |
| Sulfuritalea hydrogenivorans | protein translocase TatA                                                | 21  |
| Sulfuritalea hydrogenivorans | protein-(glutamine-N5) methyltransferase, ribosomal protein L3-specific | 4   |
| Sulfuritalea hydrogenivorans | protein-L-isoaspartate O-methyltransferase                              | 11  |
| Sulfuritalea hydrogenivorans | protoheme IX farnesyltransferase                                        | 3   |
| Sulfuritalea hydrogenivorans | pseudouridine synthase                                                  | 3   |
| Sulfuritalea hydrogenivorans | pseudouridylylase synthase                                              | 10  |
| Sulfuritalea hydrogenivorans | pterin-4-alpha-carbinolamine dehydratase                                | 1   |
| Sulfuritalea hydrogenivorans | PTS fructose transporter subunit IIA                                    | 7   |
| Sulfuritalea hydrogenivorans | pyrophosphatase                                                         | 26  |
| Sulfuritalea hydrogenivorans | pyrroline-5-carboxylate reductase                                       | 18  |
| Sulfuritalea hydrogenivorans | pyruvate dehydrogenase                                                  | 21  |
| Sulfuritalea hydrogenivorans | pyruvate ferredoxin oxidoreductase                                      | 13  |
| Sulfuritalea hydrogenivorans | pyruvate formate lyase-activating protein                               | 5   |
| Sulfuritalea hydrogenivorans | pyruvate kinase                                                         | 22  |
| Sulfuritalea hydrogenivorans | pyruvate, phosphate dikinase                                            | 5   |
| Sulfuritalea hydrogenivorans | quinol dehydrogenase                                                    | 100 |
| Sulfuritalea hydrogenivorans | quinolinate synthetase                                                  | 6   |
| Sulfuritalea hydrogenivorans | radical SAM protein                                                     | 2   |
| Sulfuritalea hydrogenivorans | recombination factor protein RarA                                       | 9   |
| Sulfuritalea hydrogenivorans | recombination protein RecR                                              | 3   |
| Sulfuritalea hydrogenivorans | reductase                                                               | 9   |
| Sulfuritalea hydrogenivorans | repressor                                                               | 15  |
| Sulfuritalea hydrogenivorans | restriction endonuclease                                                | 3   |
| Sulfuritalea hydrogenivorans | rhodanese                                                               | 67  |
| Sulfuritalea hydrogenivorans | rhodanese-like domain-containing protein                                | 12  |
| Sulfuritalea hydrogenivorans | riboflavin synthase subunit alpha                                       | 16  |
| Sulfuritalea hydrogenivorans | ribonuclease activity regulator protein RraA                            | 14  |
| Sulfuritalea hydrogenivorans | ribonuclease II                                                         | 1   |
| Sulfuritalea hydrogenivorans | ribonuclease III                                                        | 1   |
| Sulfuritalea hydrogenivorans | ribonucleotide reductase                                                | 10  |
| Sulfuritalea hydrogenivorans | ribose-phosphate pyrophosphokinase                                      | 2   |
| Sulfuritalea hydrogenivorans | ribosomal protein S12 methylthiotransferase                             | 6   |
| Sulfuritalea hydrogenivorans | ribosome maturation factor                                              | 11  |
| Sulfuritalea hydrogenivorans | ribosome maturation factor RimM                                         | 8   |
| Sulfuritalea hydrogenivorans | ribosome recycling factor                                               | 7   |
| Sulfuritalea hydrogenivorans | ribulose-phosphate 3-epimerase                                          | 22  |
| Sulfuritalea hydrogenivorans | RNA polymerase factor sigma-32                                          | 9   |
| Sulfuritalea hydrogenivorans | RNA polymerase sigma factor                                             | 5   |
| Sulfuritalea hydrogenivorans | RNA polymerase subunit sigma                                            | 23  |
| Sulfuritalea hydrogenivorans | RNA-binding protein hfq                                                 | 4   |
| Sulfuritalea hydrogenivorans | RND transporter                                                         | 3   |
| Sulfuritalea hydrogenivorans | RnfH family protein                                                     | 6   |
| Sulfuritalea hydrogenivorans | rRNA (cytidine-2'-O-)-methyltransferase                                 | 4   |
| Sulfuritalea hydrogenivorans | S-methyl-5-thioribose-1-phosphate isomerase                             | 3   |
| Sulfuritalea hydrogenivorans | S26 family signal peptidase                                             | 2   |
| Sulfuritalea hydrogenivorans | SAM-dependent methyltransferase                                         | 3   |
| Sulfuritalea hydrogenivorans | secretion system protein E                                              | 5   |
| Sulfuritalea hydrogenivorans | segregation and condensation protein A                                  | 5   |
| Sulfuritalea hydrogenivorans | serine acetyltransferase                                                | 10  |
| Sulfuritalea hydrogenivorans | serine hydroxymethyltransferase                                         | 7   |
| Sulfuritalea hydrogenivorans | serine--tRNA ligase                                                     | 4   |
| Sulfuritalea hydrogenivorans | serine/threonine protein kinase                                         | 11  |
| Sulfuritalea hydrogenivorans | SH3 type 3 domain-containing protein                                    | 8   |
| Sulfuritalea hydrogenivorans | short-chain dehydrogenase                                               | 6   |
| Sulfuritalea hydrogenivorans | signal recognition particle protein                                     | 6   |
| Sulfuritalea hydrogenivorans | single-stranded DNA-binding protein                                     | 13  |
| Sulfuritalea hydrogenivorans | sodium:proton exchanger                                                 | 11  |
| Sulfuritalea hydrogenivorans | spermidine synthase                                                     | 2   |
| Sulfuritalea hydrogenivorans | subtype II CRISPR-associated endonuclease Cas1                          | 4   |
| Sulfuritalea hydrogenivorans | succinate dehydrogenase                                                 | 40  |
| Sulfuritalea hydrogenivorans | succinyldiaminopimelate transaminase                                    | 5   |
| Sulfuritalea hydrogenivorans | sugar kinase                                                            | 6   |
| Sulfuritalea hydrogenivorans | sulfate adenyltransferase                                               | 62  |
| Sulfuritalea hydrogenivorans | sulfite reductase                                                       | 386 |
| Sulfuritalea hydrogenivorans | sulfite reductase subunit gamma                                         | 62  |
| Sulfuritalea hydrogenivorans | sulfur oxidation c-type cytochrome SoxX                                 | 5   |
| Sulfuritalea hydrogenivorans | sulfur relay protein TusB                                               | 109 |
| Sulfuritalea hydrogenivorans | sulfur transfer protein TusE                                            | 213 |

|                              |                                                                                   |     |
|------------------------------|-----------------------------------------------------------------------------------|-----|
| Sulfuritalea hydrogenivorans | sulfurtransferase                                                                 | 226 |
| Sulfuritalea hydrogenivorans | taurine catabolism dioxygenase TauD                                               | 2   |
| Sulfuritalea hydrogenivorans | TetR family transcriptional regulator                                             | 42  |
| Sulfuritalea hydrogenivorans | thiamine biosynthesis protein ThiC                                                | 13  |
| Sulfuritalea hydrogenivorans | thiamine biosynthesis protein ThiF                                                | 6   |
| Sulfuritalea hydrogenivorans | thiamine biosynthesis protein ThiS                                                | 2   |
| Sulfuritalea hydrogenivorans | thiazole synthase                                                                 | 15  |
| Sulfuritalea hydrogenivorans | thiol:disulfide interchange protein                                               | 9   |
| Sulfuritalea hydrogenivorans | thioredoxin                                                                       | 9   |
| Sulfuritalea hydrogenivorans | thioredoxin reductase                                                             | 4   |
| Sulfuritalea hydrogenivorans | thiosulfate oxidation carrier complex protein SoxZ                                | 5   |
| Sulfuritalea hydrogenivorans | thiosulfate oxidation carrier protein SoxY                                        | 63  |
| Sulfuritalea hydrogenivorans | thymidylate synthase                                                              | 18  |
| Sulfuritalea hydrogenivorans | TIGR02099 family protein                                                          | 3   |
| Sulfuritalea hydrogenivorans | transcription termination/antitermination factor NusG                             | 20  |
| Sulfuritalea hydrogenivorans | transcription-repair coupling factor                                              | 2   |
| Sulfuritalea hydrogenivorans | transcriptional regulator                                                         | 82  |
| Sulfuritalea hydrogenivorans | transglycosylase                                                                  | 5   |
| Sulfuritalea hydrogenivorans | transketolase                                                                     | 5   |
| Sulfuritalea hydrogenivorans | translation initiation factor IF-1                                                | 5   |
| Sulfuritalea hydrogenivorans | translocation protein TolB                                                        | 16  |
| Sulfuritalea hydrogenivorans | transposase                                                                       | 24  |
| Sulfuritalea hydrogenivorans | trigger factor                                                                    | 14  |
| Sulfuritalea hydrogenivorans | triose-phosphate isomerase                                                        | 12  |
| Sulfuritalea hydrogenivorans | tRNA 2-selenouridine synthase                                                     | 2   |
| Sulfuritalea hydrogenivorans | tRNA dimethylallyltransferase                                                     | 5   |
| Sulfuritalea hydrogenivorans | tRNA modification GTPase                                                          | 2   |
| Sulfuritalea hydrogenivorans | tRNA pseudouridine(38-40) synthase                                                | 7   |
| Sulfuritalea hydrogenivorans | tRNA threonylcarbamoyladenine biosynthesis protein TsaB                           | 3   |
| Sulfuritalea hydrogenivorans | tRNA threonylcarbamoyladenine dehydratase                                         | 3   |
| Sulfuritalea hydrogenivorans | tRNA-dihydrouridine synthase B                                                    | 1   |
| Sulfuritalea hydrogenivorans | tryptophan synthase subunit alpha                                                 | 3   |
| Sulfuritalea hydrogenivorans | tryptophan synthase subunit beta                                                  | 7   |
| Sulfuritalea hydrogenivorans | tryptophan--tRNA ligase                                                           | 10  |
| Sulfuritalea hydrogenivorans | tungsten ABC transporter substrate-binding protein                                | 2   |
| Sulfuritalea hydrogenivorans | twitching motility protein PilT                                                   | 9   |
| Sulfuritalea hydrogenivorans | two-component sensor histidine kinase                                             | 32  |
| Sulfuritalea hydrogenivorans | type I-MYXAN CRISPR-associated protein Cas6/Cmx6                                  | 54  |
| Sulfuritalea hydrogenivorans | type II CRISPR RNA-guided endonuclease Cas9                                       | 3   |
| Sulfuritalea hydrogenivorans | UDP diphosphate synthase                                                          | 3   |
| Sulfuritalea hydrogenivorans | UDP pyrophosphate phosphatase                                                     | 3   |
| Sulfuritalea hydrogenivorans | UDP-3-O-(3-hydroxymyristoyl)glucosamine N-acyltransferase                         | 4   |
| Sulfuritalea hydrogenivorans | UDP-3-O-[3-hydroxymyristoyl] N-acetylglucosamine deacetylase                      | 21  |
| Sulfuritalea hydrogenivorans | UDP-N-acetylenolpyruvoylglucosamine reductase                                     | 9   |
| Sulfuritalea hydrogenivorans | UDP-N-acetylglucosamine 1-carboxyvinyltransferase                                 | 2   |
| Sulfuritalea hydrogenivorans | UDP-N-acetylmuramoyl-tripeptide--D-alanyl-D-alanine ligase                        | 3   |
| Sulfuritalea hydrogenivorans | UDP-N-acetylmuramoylalanine--D-glutamate ligase                                   | 4   |
| Sulfuritalea hydrogenivorans | uridine monophosphate kinase                                                      | 2   |
| Sulfuritalea hydrogenivorans | uroporphyrinogen decarboxylase                                                    | 6   |
| Sulfuritalea hydrogenivorans | uroporphyrinogen III methyltransferase                                            | 12  |
| Sulfuritalea hydrogenivorans | valine--tRNA ligase                                                               | 15  |
| Sulfuritalea hydrogenivorans | VWA domain-containing protein                                                     | 1   |
| Sulfuritalea hydrogenivorans | zinc protease                                                                     | 4   |
| Thauera                      | MULTISPECIES: 1-acyl-sn-glycerol-3-phosphate acyltransferase                      | 2   |
| Thauera                      | MULTISPECIES: 3-oxoacyl-ACP synthase                                              | 15  |
| Thauera                      | MULTISPECIES: 30S ribosomal protein S12                                           | 7   |
| Thauera                      | MULTISPECIES: 30S ribosomal protein S4                                            | 13  |
| Thauera                      | MULTISPECIES: 30S ribosomal protein S5                                            | 5   |
| Thauera                      | MULTISPECIES: 4-hydroxy-3-methylbut-2-enyl diphosphate reductase                  | 3   |
| Thauera                      | MULTISPECIES: ABC transporter ATP-binding protein                                 | 5   |
| Thauera                      | MULTISPECIES: ABC transporter permease                                            | 8   |
| Thauera                      | MULTISPECIES: acyl carrier protein                                                | 31  |
| Thauera                      | MULTISPECIES: amino acid ABC transporter substrate-binding protein                | 2   |
| Thauera                      | MULTISPECIES: anti sigma-E protein, RseA                                          | 12  |
| Thauera                      | MULTISPECIES: binding-protein-dependent transporter system inner membrane protein | 2   |
| Thauera                      | MULTISPECIES: carbamoylphosphate synthase large subunit                           | 3   |
| Thauera                      | MULTISPECIES: carbonate dehydratase                                               | 2   |
| Thauera                      | MULTISPECIES: cupin                                                               | 2   |
| Thauera                      | MULTISPECIES: cyclohexa-1,5-dienecarbonyl-CoA hydratase                           | 0   |
| Thauera                      | MULTISPECIES: cytochrome c'                                                       | 5   |
| Thauera                      | MULTISPECIES: cytochrome-c oxidase                                                | 12  |
| Thauera                      | MULTISPECIES: enoyl-CoA hydratase                                                 | 11  |
| Thauera                      | MULTISPECIES: F0F1 ATP synthase subunit delta                                     | 34  |
| Thauera                      | MULTISPECIES: fimbrial assembly protein                                           | 8   |

|                        |                                                                     |     |
|------------------------|---------------------------------------------------------------------|-----|
| Thauera                | MULTISPECIES: formaldehyde-activating enzyme                        | 1   |
| Thauera                | MULTISPECIES: hydroxypyruvate isomerase                             | 6   |
| Thauera                | MULTISPECIES: hypothetical protein                                  | 70  |
| Thauera                | MULTISPECIES: imidazole glycerol phosphate synthase subunit HisH    | 23  |
| Thauera                | MULTISPECIES: integration host factor subunit alpha                 | 15  |
| Thauera                | MULTISPECIES: iron-sulfur cluster scaffold-like protein             | 15  |
| Thauera                | MULTISPECIES: iron-sulfur subunit of cytochrome bc1                 | 6   |
| Thauera                | MULTISPECIES: LysR family transcriptional regulator                 | 4   |
| Thauera                | MULTISPECIES: magnesium transporter                                 | 1   |
| Thauera                | MULTISPECIES: MarR family transcriptional regulator                 | 11  |
| Thauera                | MULTISPECIES: membrane protein                                      | 17  |
| Thauera                | MULTISPECIES: MerR family transcriptional regulator                 | 4   |
| Thauera                | MULTISPECIES: metal-dependent hydrolase                             | 17  |
| Thauera                | MULTISPECIES: metal-transporting ATPase                             | 3   |
| Thauera                | MULTISPECIES: molecular chaperone                                   | 1   |
| Thauera                | MULTISPECIES: molecular chaperone DnaK                              | 13  |
| Thauera                | MULTISPECIES: N-methyltransferase                                   | 6   |
| Thauera                | MULTISPECIES: NAD-dependent succinate-semialdehyde dehydrogenase    | 5   |
| Thauera                | MULTISPECIES: nitric oxide reductase                                | 21  |
| Thauera                | MULTISPECIES: nitrite reductase                                     | 10  |
| Thauera                | MULTISPECIES: nitrogen regulatory protein P-II                      | 1   |
| Thauera                | MULTISPECIES: peptide ABC transporter permease                      | 5   |
| Thauera                | MULTISPECIES: peptidoglycan glycosyltransferase                     | 5   |
| Thauera                | MULTISPECIES: peptidoglycan-binding protein                         | 6   |
| Thauera                | MULTISPECIES: phosphohistidine phosphatase                          | 2   |
| Thauera                | MULTISPECIES: pilus assembly protein PilN                           | 11  |
| Thauera                | MULTISPECIES: prephenate dehydratase                                | 3   |
| Thauera                | MULTISPECIES: prevent-host-death family protein                     | 3   |
| Thauera                | MULTISPECIES: protein sphX                                          | 84  |
| Thauera                | MULTISPECIES: ribosomal-protein-alanine N-acetyltransferase RimI    | 11  |
| Thauera                | MULTISPECIES: transcriptional regulator                             | 11  |
| Thauera                | MULTISPECIES: transposase                                           | 10  |
| Thauera                | MULTISPECIES: twin-arginine translocation pathway signal protein    | 14  |
| Thauera                | MULTISPECIES: ubiquinone/menaquinone biosynthesis methyltransferase | 3   |
| Thauera aminoaromatica | amino acid carrier protein                                          | 6   |
| Thauera aminoaromatica | cysteine desulfurase                                                | 3   |
| Thauera aminoaromatica | cytochrome C biogenesis protein CcsB                                | 4   |
| Thauera aminoaromatica | hypothetical protein                                                | 15  |
| Thauera aminoaromatica | lipopolysaccharide biosynthesis protein RfbH                        | 3   |
| Thauera aminoaromatica | phosphoserine transaminase                                          | 2   |
| Thauera aminoaromatica | porin                                                               | 29  |
| Thauera aminoaromatica | S-adenosyl-L-homocysteine hydrolase                                 | 11  |
| Thauera aminoaromatica | transcriptional regulator                                           | 2   |
| Thauera humireducens   | 2-hydroxy-3-oxopropionate reductase                                 | 23  |
| Thauera humireducens   | ABC transporter permease                                            | 4   |
| Thauera humireducens   | ABC transporter substrate-binding protein                           | 11  |
| Thauera humireducens   | acyl-phosphate glycerol 3-phosphate acyltransferase                 | 2   |
| Thauera humireducens   | alpha/beta hydrolase                                                | 8   |
| Thauera humireducens   | ATP phosphoribosyltransferase regulatory subunit                    | 8   |
| Thauera humireducens   | AzIc family protein                                                 | 4   |
| Thauera humireducens   | BAX inhibitor protein                                               | 16  |
| Thauera humireducens   | branched chain amino acid ABC transporter substrate-binding protein | 5   |
| Thauera humireducens   | C4-dicarboxylate ABC transporter                                    | 1   |
| Thauera humireducens   | C4-dicarboxylate ABC transporter substrate-binding protein          | 5   |
| Thauera humireducens   | carboxymethylenebutenolidase                                        | 10  |
| Thauera humireducens   | cation:proton antiporter                                            | 5   |
| Thauera humireducens   | CoA-binding protein                                                 | 4   |
| Thauera humireducens   | cytochrome C'                                                       | 15  |
| Thauera humireducens   | cytochrome C551                                                     | 1   |
| Thauera humireducens   | diguanylate cyclase response regulator                              | 4   |
| Thauera humireducens   | dihydropteroate synthase                                            | 10  |
| Thauera humireducens   | DNA repair protein RadC                                             | 15  |
| Thauera humireducens   | DNA starvation/stationary phase protection protein                  | 101 |
| Thauera humireducens   | electron transporter RnfB                                           | 15  |
| Thauera humireducens   | endonuclease                                                        | 3   |
| Thauera humireducens   | Fe-S cluster assembly protein SufD                                  | 3   |
| Thauera humireducens   | FHA domain-containing protein                                       | 5   |
| Thauera humireducens   | flagellar biosynthesis protein FlhA                                 | 3   |
| Thauera humireducens   | flagellar motor protein MotA                                        | 3   |
| Thauera humireducens   | flagellin                                                           | 6   |
| Thauera humireducens   | GDP-mannose dehydrogenase                                           | 7   |
| Thauera humireducens   | glycine cleavage system protein H                                   | 7   |
| Thauera humireducens   | glycosyl transferase family 1                                       | 4   |
| Thauera humireducens   | glyoxylate carboligase                                              | 46  |

|                      |                                                                                       |    |
|----------------------|---------------------------------------------------------------------------------------|----|
| Thauera humireducens | GNAT family acetyltransferase                                                         | 4  |
| Thauera humireducens | group II intron reverse transcriptase/maturase                                        | 6  |
| Thauera humireducens | hemolysin D                                                                           | 12 |
| Thauera humireducens | hybrid sensor histidine kinase/response regulator                                     | 5  |
| Thauera humireducens | hypothetical protein                                                                  | 39 |
| Thauera humireducens | IMP dehydrogenase                                                                     | 4  |
| Thauera humireducens | integrase                                                                             | 2  |
| Thauera humireducens | methylation                                                                           | 12 |
| Thauera humireducens | MFS transporter                                                                       | 5  |
| Thauera humireducens | N-(5'-phosphoribosyl)anthranilate isomerase                                           | 6  |
| Thauera humireducens | NAD(P)-dependent oxidoreductase                                                       | 2  |
| Thauera humireducens | NADH-ubiquinone oxidoreductase subunit 4L                                             | 2  |
| Thauera humireducens | NnrS family protein                                                                   | 1  |
| Thauera humireducens | nodulation efficiency protein D                                                       | 13 |
| Thauera humireducens | nucleotidyltransferase                                                                | 5  |
| Thauera humireducens | peptidoglycan bridge formation protein FemAB                                          | 2  |
| Thauera humireducens | phosphoribosylglycinamide formyltransferase                                           | 4  |
| Thauera humireducens | phytoene dehydrogenase                                                                | 4  |
| Thauera humireducens | prenyltransferase UbiA                                                                | 2  |
| Thauera humireducens | protein involved in RimO-mediated beta-methylthiolation of ribosomal protein S12 YcaO | 6  |
| Thauera humireducens | PTS sugar transporter subunit IIA                                                     | 3  |
| Thauera humireducens | ribulose 1,5-bisphosphate carboxylase                                                 | 23 |
| Thauera humireducens | sigma-54-dependent Fis family transcriptional regulator                               | 3  |
| Thauera humireducens | succinyl-diaminopimelate desuccinylase                                                | 3  |
| Thauera humireducens | thiol reductase thioredoxin                                                           | 2  |
| Thauera humireducens | transcriptional repressor                                                             | 2  |
| Thauera humireducens | transposase                                                                           | 18 |
| Thauera humireducens | tyrosine--tRNA ligase                                                                 | 10 |
| Thauera humireducens | UDP-N-acetyl glucosamine 2-epimerase                                                  | 2  |
| Thauera linaloentis  | (2Fe-2S)-binding protein                                                              | 2  |
| Thauera linaloentis  | 2-isopropylmalate synthase                                                            | 5  |
| Thauera linaloentis  | 30S ribosomal protein S6                                                              | 6  |
| Thauera linaloentis  | ABC transporter ATP-binding protein                                                   | 3  |
| Thauera linaloentis  | alginate biosynthesis protein AlgZ/FimS                                               | 4  |
| Thauera linaloentis  | anaerobic ribonucleoside triphosphate reductase                                       | 3  |
| Thauera linaloentis  | carboxysome structural protein EutM                                                   | 28 |
| Thauera linaloentis  | cell division protein FtsW                                                            | 4  |
| Thauera linaloentis  | chemotaxis regulator CheZ                                                             | 12 |
| Thauera linaloentis  | Crp/Fnr family transcriptional regulator                                              | 3  |
| Thauera linaloentis  | cytochrome c, class IC:cytochrome c, class I                                          | 9  |
| Thauera linaloentis  | cytochrome c553                                                                       | 8  |
| Thauera linaloentis  | diacylglycerol kinase                                                                 | 1  |
| Thauera linaloentis  | DNA gyrase subunit A                                                                  | 10 |
| Thauera linaloentis  | DNA polymerase IV                                                                     | 3  |
| Thauera linaloentis  | DNA-binding domain-containing protein                                                 | 4  |
| Thauera linaloentis  | DNA-directed RNA polymerase subunit alpha                                             | 25 |
| Thauera linaloentis  | electron transporter RnfC                                                             | 4  |
| Thauera linaloentis  | ethanolamine utilization protein EutJ                                                 | 1  |
| Thauera linaloentis  | Fis family transcriptional regulator                                                  | 5  |
| Thauera linaloentis  | FMN-binding protein                                                                   | 4  |
| Thauera linaloentis  | formyltetrahydrofolate deformylase                                                    | 2  |
| Thauera linaloentis  | glutamate synthase subunit beta                                                       | 12 |
| Thauera linaloentis  | glycosyl transferase family 2                                                         | 3  |
| Thauera linaloentis  | hemerythrin                                                                           | 8  |
| Thauera linaloentis  | histidine kinase                                                                      | 5  |
| Thauera linaloentis  | hybrid sensor histidine kinase/response regulator                                     | 4  |
| Thauera linaloentis  | hypothetical protein                                                                  | 71 |
| Thauera linaloentis  | L-threonine-O-3-phosphate decarboxylase, partial                                      | 2  |
| Thauera linaloentis  | leucine--tRNA ligase                                                                  | 16 |
| Thauera linaloentis  | MBL fold metallo-hydrolase                                                            | 2  |
| Thauera linaloentis  | NADH dehydrogenase subunit C                                                          | 9  |
| Thauera linaloentis  | OsmC family protein                                                                   | 3  |
| Thauera linaloentis  | periplasmic copper-binding protein                                                    | 23 |
| Thauera linaloentis  | phosphoribosyl-AMP cyclohydrolase                                                     | 27 |
| Thauera linaloentis  | PIN domain-containing protein                                                         | 1  |
| Thauera linaloentis  | polyhydroxyalkonate synthesis repressor, PhaR                                         | 18 |
| Thauera linaloentis  | protease                                                                              | 4  |
| Thauera linaloentis  | pyruvate carboxylase, partial                                                         | 20 |
| Thauera linaloentis  | ribosome-associated inhibitor A/sigma 54 modulation protein                           | 8  |
| Thauera linaloentis  | RNA polymerase sigma-54 factor                                                        | 3  |
| Thauera linaloentis  | transcription-repair coupling factor                                                  | 1  |
| Thauera linaloentis  | translation initiation factor IF-2                                                    | 10 |
| Thauera linaloentis  | TRAP ABC transporter permease                                                         | 5  |
| Thauera linaloentis  | type II secretion system protein GspD                                                 | 5  |

|                       |                                                                                                                     |     |
|-----------------------|---------------------------------------------------------------------------------------------------------------------|-----|
| Thauera linaloolentis | ubiquinone/menaquinone biosynthesis methyltransferase UbiE                                                          | 4   |
| Thauera linaloolentis | UDP-N-acetylglucosamine--N-acetylmuramyl-(pentapeptide) pyrophosphoryl-undecaprenol N-acetylglucosamine transferase | 8   |
| Thauera linaloolentis | Undecaprenyl phosphate-alpha-4-amino-4-deoxy-L-arabinose arabinosyl transferase                                     | 2   |
| Thauera phenylacetica | 2-isopropylmalate synthase                                                                                          | 123 |
| Thauera phenylacetica | 23S rRNA (uracil(1939)-C(5))-methyltransferase                                                                      | 2   |
| Thauera phenylacetica | 4Fe-4S ferredoxin                                                                                                   | 7   |
| Thauera phenylacetica | 5,10-methylenetetrahydrofolate reductase                                                                            | 3   |
| Thauera phenylacetica | ABC transporter                                                                                                     | 18  |
| Thauera phenylacetica | ABC transporter permease                                                                                            | 3   |
| Thauera phenylacetica | ABC transporter substrate-binding protein                                                                           | 2   |
| Thauera phenylacetica | aminotransferase DegT                                                                                               | 2   |
| Thauera phenylacetica | ATPase (AAA+ superfamily)-like protein                                                                              | 6   |
| Thauera phenylacetica | bifunctional metallophosphatase/5'-nucleotidase                                                                     | 4   |
| Thauera phenylacetica | cohyrnic acid ac-diamide synthase                                                                                   | 11  |
| Thauera phenylacetica | colanic acid biosynthesis glycosyltransferase WcaL                                                                  | 2   |
| Thauera phenylacetica | collagen-binding protein                                                                                            | 3   |
| Thauera phenylacetica | Crp/Fnr family transcriptional regulator                                                                            | 12  |
| Thauera phenylacetica | D-alanyl-D-alanine endopeptidase                                                                                    | 2   |
| Thauera phenylacetica | dihydroliipoamide dehydrogenase, partial                                                                            | 7   |
| Thauera phenylacetica | DNA polymerase beta domain-containing protein                                                                       | 4   |
| Thauera phenylacetica | DNA-binding response regulator                                                                                      | 9   |
| Thauera phenylacetica | exodeoxyribonuclease VII small subunit                                                                              | 8   |
| Thauera phenylacetica | flagellar motor protein MotA                                                                                        | 3   |
| Thauera phenylacetica | flagellar motor switch protein FlhN                                                                                 | 13  |
| Thauera phenylacetica | glutamate dehydrogenase                                                                                             | 10  |
| Thauera phenylacetica | glutamate--tRNA ligase                                                                                              | 4   |
| Thauera phenylacetica | GNAT family N-acetyltransferase                                                                                     | 1   |
| Thauera phenylacetica | haloacid dehalogenase                                                                                               | 14  |
| Thauera phenylacetica | histidinol dehydrogenase                                                                                            | 9   |
| Thauera phenylacetica | Holliday junction DNA helicase                                                                                      | 5   |
| Thauera phenylacetica | hybrid sensor histidine kinase/response regulator                                                                   | 2   |
| Thauera phenylacetica | hydrogenase (NiFe) small subunit HydA, partial                                                                      | 20  |
| Thauera phenylacetica | hypothetical protein                                                                                                | 55  |
| Thauera phenylacetica | hypoxanthine-guanine phosphoribosyltransferase                                                                      | 6   |
| Thauera phenylacetica | isocitrate dehydrogenase                                                                                            | 10  |
| Thauera phenylacetica | MBL fold hydrolase                                                                                                  | 3   |
| Thauera phenylacetica | MBL fold metallo-hydrolase                                                                                          | 3   |
| Thauera phenylacetica | membrane protein                                                                                                    | 4   |
| Thauera phenylacetica | molybdopterin oxidoreductase                                                                                        | 14  |
| Thauera phenylacetica | monovalent cation/H+ antiporter subunit A                                                                           | 11  |
| Thauera phenylacetica | multiple resistance and pH regulation protein F                                                                     | 11  |
| Thauera phenylacetica | Na+/solute symporter                                                                                                | 5   |
| Thauera phenylacetica | Ni/Fe hydrogenase                                                                                                   | 3   |
| Thauera phenylacetica | nitrite reductase large subunit                                                                                     | 1   |
| Thauera phenylacetica | nitrous oxide reductase accessory protein NosL                                                                      | 11  |
| Thauera phenylacetica | nucleic acid-binding protein                                                                                        | 5   |
| Thauera phenylacetica | ornithine carbamoyltransferase                                                                                      | 2   |
| Thauera phenylacetica | PAS domain-containing sensor histidine kinase                                                                       | 2   |
| Thauera phenylacetica | peptidyl-prolyl cis-trans isomerase A                                                                               | 5   |
| Thauera phenylacetica | phosphoenolpyruvate carboxykinase                                                                                   | 6   |
| Thauera phenylacetica | phosphoenolpyruvate carboxylase                                                                                     | 5   |
| Thauera phenylacetica | PIN domain-containing protein                                                                                       | 10  |
| Thauera phenylacetica | pyruvate ferredoxin/flavodoxin oxidoreductase subunit beta                                                          | 5   |
| Thauera phenylacetica | ribonuclease H                                                                                                      | 3   |
| Thauera phenylacetica | SMC-Scp complex subunit ScpB                                                                                        | 12  |
| Thauera phenylacetica | sodium-independent anion transporter                                                                                | 5   |
| Thauera phenylacetica | tol-pal system-associated acyl-CoA thioesterase                                                                     | 3   |
| Thauera phenylacetica | transposase                                                                                                         | 12  |
| Thauera phenylacetica | type II secretion system protein GspG                                                                               | 2   |
| Thauera phenylacetica | type IV pilus assembly protein PilX                                                                                 | 10  |
| Thauera sp. MZ1T      | alkaline phosphatase                                                                                                | 5   |
| Thauera sp. MZ1T      | ATP-binding protein                                                                                                 | 2   |
| Thauera sp. MZ1T      | ATP-dependent protease                                                                                              | 16  |
| Thauera sp. MZ1T      | cobalt transporter                                                                                                  | 56  |
| Thauera sp. MZ1T      | DNA polymerase III subunit epsilon                                                                                  | 4   |
| Thauera sp. MZ1T      | DNA-cytosine methyltransferase                                                                                      | 5   |
| Thauera sp. MZ1T      | hypothetical protein                                                                                                | 38  |
| Thauera sp. MZ1T      | multidrug ABC transporter ATP-binding protein                                                                       | 14  |
| Thauera sp. MZ1T      | protoheme IX farnesyltransferase                                                                                    | 2   |
| Thauera sp. MZ1T      | pyruvate, phosphate dikinase                                                                                        | 2   |
| Thauera sp. MZ1T      | RND transporter                                                                                                     | 2   |
| Thauera sp. MZ1T      | single-stranded DNA exonuclease                                                                                     | 1   |
| Thauera sp. MZ1T      | transporter                                                                                                         | 5   |
| Thauera sp. MZ1T      | UDP-glucose 4-epimerase                                                                                             | 2   |



|                                |                                                         |     |
|--------------------------------|---------------------------------------------------------|-----|
| Thauera sp. MZ1T               | uracil phosphoribosyltransferase                        | 3   |
| Thauera sp. MZ1T               | zinc-binding dehydrogenase                              | 1   |
| Thauera terpenica              | 3-deoxy-manno-octulosonate cytidyltransferase           | 3   |
| Thauera terpenica              | 30S ribosomal protein S9                                | 10  |
| Thauera terpenica              | 6,7-dimethyl-8-ribityllumazine synthase                 | 7   |
| Thauera terpenica              | ABC transporter permease                                | 1   |
| Thauera terpenica              | acetyl-CoA carboxylase                                  | 5   |
| Thauera terpenica              | addiction module antitoxin                              | 6   |
| Thauera terpenica              | aspartate carbamoyltransferase                          | 3   |
| Thauera terpenica              | ATP-dependent endonuclease                              | 6   |
| Thauera terpenica              | ebb3-type cytochrome c oxidase subunit I                | 3   |
| Thauera terpenica              | conjugal transfer protein TraR                          | 3   |
| Thauera terpenica              | CopG family transcriptional regulator                   | 6   |
| Thauera terpenica              | DEAD/DEAH box helicase                                  | 2   |
| Thauera terpenica              | DNA polymerase                                          | 10  |
| Thauera terpenica              | DNA topoisomerase I                                     | 2   |
| Thauera terpenica              | exodeoxyribonuclease V subunit gamma                    | 4   |
| Thauera terpenica              | flagellar biosynthesis protein FlhQ                     | 2   |
| Thauera terpenica              | GNAT family N-acetyltransferase                         | 3   |
| Thauera terpenica              | hypothetical protein                                    | 127 |
| Thauera terpenica              | LPS biosynthesis protein                                | 2   |
| Thauera terpenica              | MBL fold hydrolase                                      | 3   |
| Thauera terpenica              | NADH dehydrogenase                                      | 4   |
| Thauera terpenica              | nitrate reductase A subunit alpha                       | 5   |
| Thauera terpenica              | prevent-host-death protein                              | 10  |
| Thauera terpenica              | quinone oxidoreductase                                  | 6   |
| Thauera terpenica              | sugar kinase                                            | 5   |
| Thauera terpenica              | sugar transferase                                       | 2   |
| Thauera terpenica              | transposase                                             | 4   |
| Uliginosibacterium gangwonense | 3-isopropylmalate dehydratase small subunit             | 9   |
| Uliginosibacterium gangwonense | 3-polyprenyl-4-hydroxybenzoate decarboxylase            | 3   |
| Uliginosibacterium gangwonense | 30S ribosomal protein S18                               | 6   |
| Uliginosibacterium gangwonense | 50S ribosomal protein L2                                | 21  |
| Uliginosibacterium gangwonense | 50S ribosomal protein L20                               | 12  |
| Uliginosibacterium gangwonense | 6-phosphofructokinase                                   | 1   |
| Uliginosibacterium gangwonense | 6-phosphogluconate dehydrogenase                        | 1   |
| Uliginosibacterium gangwonense | ABC transporter substrate-binding protein               | 2   |
| Uliginosibacterium gangwonense | adenylosuccinate lyase                                  | 2   |
| Uliginosibacterium gangwonense | alkyl hydroperoxide reductase subunit C                 | 13  |
| Uliginosibacterium gangwonense | alkyl hydroperoxide reductase subunit F                 | 36  |
| Uliginosibacterium gangwonense | amino acid ABC transporter substrate-binding protein    | 2   |
| Uliginosibacterium gangwonense | aspartate aminotransferase                              | 4   |
| Uliginosibacterium gangwonense | chromosomal replication initiator protein DnaA          | 2   |
| Uliginosibacterium gangwonense | citramalate synthase                                    | 4   |
| Uliginosibacterium gangwonense | cyclic pyranopterin phosphate synthase MoaA             | 5   |
| Uliginosibacterium gangwonense | cyclopropane-fatty-acyl-phospholipid synthase           | 7   |
| Uliginosibacterium gangwonense | D-alanine--D-alanine ligase                             | 4   |
| Uliginosibacterium gangwonense | elongation factor Tu                                    | 12  |
| Uliginosibacterium gangwonense | FOF1 ATP synthase subunit B                             | 27  |
| Uliginosibacterium gangwonense | FOF1 ATP synthase subunit C                             | 3   |
| Uliginosibacterium gangwonense | Fe-S cluster assembly transcriptional regulator IscR    | 10  |
| Uliginosibacterium gangwonense | flagellar biosynthesis sigma factor                     | 2   |
| Uliginosibacterium gangwonense | glucose-1-phosphate thymidyltransferase                 | 3   |
| Uliginosibacterium gangwonense | glyceraldehyde-3-phosphate dehydrogenase                | 3   |
| Uliginosibacterium gangwonense | glycerol kinase                                         | 2   |
| Uliginosibacterium gangwonense | GTPase Era                                              | 4   |
| Uliginosibacterium gangwonense | histidine--tRNA ligase                                  | 10  |
| Uliginosibacterium gangwonense | hydroxylamine reductase                                 | 10  |
| Uliginosibacterium gangwonense | hypothetical protein                                    | 283 |
| Uliginosibacterium gangwonense | hypothetical protein, partial                           | 10  |
| Uliginosibacterium gangwonense | NADH dehydrogenase                                      | 5   |
| Uliginosibacterium gangwonense | peptidase                                               | 14  |
| Uliginosibacterium gangwonense | peptide ABC transporter permease                        | 1   |
| Uliginosibacterium gangwonense | phosphate ABC transporter substrate-binding protein     | 25  |
| Uliginosibacterium gangwonense | phosphate transporter permease subunit PstC             | 3   |
| Uliginosibacterium gangwonense | pilus assembly protein                                  | 2   |
| Uliginosibacterium gangwonense | protease                                                | 4   |
| Uliginosibacterium gangwonense | RNA pseudouridine synthase                              | 3   |
| Uliginosibacterium gangwonense | serine/threonine protein phosphatase                    | 11  |
| Uliginosibacterium gangwonense | sigma-54-dependent Fis family transcriptional regulator | 25  |
| Uliginosibacterium gangwonense | sugar ABC transporter substrate-binding protein         | 11  |
| Uliginosibacterium gangwonense | sulphydrogenase subunit delta                           | 1   |
| Uliginosibacterium gangwonense | toxin RelE                                              | 22  |
| Uliginosibacterium gangwonense | transcription elongation factor GreA                    | 2   |

|                                |                                       |    |
|--------------------------------|---------------------------------------|----|
| Uliginosibacterium gangwonense | transcriptional regulator             | 4  |
| Uliginosibacterium gangwonense | translation initiation factor IF-1    | 13 |
| Uliginosibacterium gangwonense | tRNA-dihydrouridine synthase A        | 5  |
| Uliginosibacterium gangwonense | tryptophan synthase subunit alpha     | 14 |
| Uliginosibacterium gangwonense | two-component sensor histidine kinase | 11 |

**Table S4. Preliminary RNA analysis by reverse transcription PCR-cloning.**

| GenBank Accession number      | Clone sequence title                                 | Frequency | Relative abundance | Putative phylum       | Length (nt) | GenBank accession number | % of identity |
|-------------------------------|------------------------------------------------------|-----------|--------------------|-----------------------|-------------|--------------------------|---------------|
| <b>Archaea 16S rRNA gene</b>  |                                                      |           |                    |                       |             |                          |               |
| KF901390                      | Uncultured archaeon BE326FW120712BH2 16S rRNA OTU1   | 11        | 23%                | Unidentified archaeon | 752         | AB019753                 | 92%           |
| KF901391                      | Uncultured archaeon BE326FW120712BH2 16S rRNA OTU2   | 8         | 17%                | Methanobacterium      | 756         | AY695843                 | 99%           |
| KF901392                      | Uncultured archaeon BE326FW120712BH2 16S rRNA OTU3   | 7         | 15%                | Methanobacterium      | 753         | NR_028236                | 73%           |
| KF901393                      | Uncultured archaeon BE326FW120712BH2 16S rRNA OTU4   | 6         | 13%                | Uncultured archaeon   | 749         | JF280168                 | 96%           |
| KF901394                      | Uncultured archaeon BE326FW120712BH2 16S rRNA OTU5   | 5         | 11%                | Uncultured archaeon   | 753         | DQ310380                 | 90%           |
| KF901395                      | Uncultured archaeon BE326FW120712BH2 16S rRNA OTU6   | 5         | 11%                | Methanobacterium      | 756         | AY695843                 | 99%           |
| KF901396                      | Uncultured archaeon BE326FW120712BH2 16S rRNA OTU7   | 2         | 4%                 | Unidentified archaeon | 752         | AM019753                 | 91%           |
| KF901397                      | Uncultured archaeon BE326FW120712BH2 16S rRNA OTU8   | 1         | 2%                 | Uncultured archaeon   | 752         | JF280168                 | 95%           |
| KF901398                      | Uncultured archaeon BE326FW120712BH2 16S rRNA OTU9   | 1         | 2%                 | Unidentified archaeon | 593         | AB019753                 | 93%           |
| KF901399                      | Uncultured archaeon BE326FW120712BH2 16S rRNA OTU10  | 1         | 2%                 | Uncultured archaeon   | 751         | DQ310393                 | 93%           |
| <b>Bacteria 16S rRNA gene</b> |                                                      |           |                    |                       |             |                          |               |
| KF901400                      | Uncultured bacterium BE326FW120712BH2 16S rRNA OTU1  | 33        | 31%                | Alphaproteobacteria   | 787         | CP002568                 | 99%           |
| KF901401                      | Uncultured bacterium BE326FW120712BH2 16S rRNA OTU2  | 28        | 27%                | Alphaproteobacteria   | 786         | HQ588848                 | 99%           |
| KF901402                      | Uncultured bacterium BE326FW120712BH2 16S rRNA OTU3  | 6         | 6%                 | Betaproteobacteria    | 854         | GQ921470                 | 99%           |
| KF901403                      | Uncultured bacterium BE326FW120712BH2 16S rRNA OTU4  | 6         | 6%                 | Betaproteobacteria    | 843         | DQ230972                 | 99%           |
| KF901404                      | Uncultured bacterium BE326FW120712BH2 16S rRNA OTU5  | 5         | 5%                 | Betaproteobacteria    | 816         | EF667533                 | 96%           |
| KF901405                      | Uncultured bacterium BE326FW120712BH2 16S rRNA OTU6  | 3         | 3%                 | Chlorobi              | 838         | AY741700                 | 97%           |
| KF901406                      | Uncultured bacterium BE326FW120712BH2 16S rRNA OTU7  | 3         | 3%                 | gamma-proteobacteria  | 751         | NR_043670                | 99%           |
| KF901407                      | Uncultured bacterium BE326FW120712BH2 16S rRNA OTU8  | 3         | 3%                 | Alphaproteobacteria   | 787         | GU212810                 | 99%           |
| KF901408                      | Uncultured bacterium BE326FW120712BH2 16S rRNA OTU9  | 2         | 2%                 | Alphaproteobacteria   | 786         | AM159370                 | 95%           |
| KF901409                      | Uncultured bacterium BE326FW120712BH2 16S rRNA OTU10 | 2         | 2%                 | Alphaproteobacteria   | 674         | CP002568                 | 100%          |
| KF901410                      | Uncultured bacterium BE326FW120712BH2 16S rRNA OTU11 | 2         | 2%                 | Betaproteobacteria    | 782         | AY133108                 | 99%           |
| KF901411                      | Uncultured bacterium BE326FW120712BH2 16S rRNA OTU12 | 2         | 2%                 | Betaproteobacteria    | 657         | GQ921470                 | 99%           |
| KF901412                      | Uncultured bacterium BE326FW120712BH2 16S rRNA OTU13 | 1         | 1%                 | Uncultured bacterium  | 741         | JF265770                 | 90%           |
| KF901413                      | Uncultured bacterium BE326FW120712BH2 16S rRNA OTU14 | 1         | 1%                 | Alphaproteobacteria   | 784         | AM990693                 | 98%           |
| KF901414                      | Uncultured bacterium BE326FW120712BH2 16S rRNA OTU15 | 1         | 1%                 | Betaproteobacteria    | 624         | FJ484727                 | 100%          |
| KF901415                      | Uncultured bacterium BE326FW120712BH2 16S rRNA OTU16 | 1         | 1%                 | Alphaproteobacteria   | 761         | EF663214                 | 94%           |
| KF901416                      | Uncultured bacterium BE326FW120712BH2 16S rRNA OTU17 | 1         | 1%                 | Alphaproteobacteria   | 725         | JN082255                 | 99%           |
| KF901417                      | Uncultured bacterium BE326FW120712BH2 16S rRNA OTU18 | 1         | 1%                 | Alphaproteobacteria   | 772         | AB682666                 | 99%           |
| KF901418                      | Uncultured bacterium BE326FW120712BH2 16S rRNA OTU19 | 1         | 1%                 | Alphaproteobacteria   | 674         | AM159370                 | 94%           |
| KF901419                      | Uncultured bacterium BE326FW120712BH2 16S rRNA OTU20 | 1         | 1%                 | Alphaproteobacteria   | 764         | CP002568                 | 97%           |
| KF901420                      | Uncultured bacterium BE326FW120712BH2 16S rRNA OTU21 | 1         | 1%                 | Alphaproteobacteria   | 623         | CU919551                 | 93%           |
| KF901421                      | Uncultured bacterium BE326FW120712BH2 16S rRNA OTU22 | 1         | 1%                 | Betaproteobacteria    | 650         | FJ484495                 | 94%           |
| <b>NifH gene</b>              |                                                      |           |                    |                       |             |                          |               |
| KF901484                      | Uncultured bacterium BE326FW120712BH2 cDNA nifH OTU1 | 4         | 44%                | Uncultured bacterium  | 322         | FJ394994                 | 92%           |
| KF901485                      | Uncultured bacterium BE326FW120712BH2 cDNA nifH OTU2 | 2         | 22%                | Uncultured bacterium  | 322         | AB471165                 | 95%           |
| KF901486                      | Uncultured bacterium BE326FW120712BH2 cDNA nifH OTU3 | 1         | 11%                | Uncultured bacterium  | 322         | GU367884                 | 94%           |
| KF901487                      | Uncultured bacterium BE326FW120712BH2 cDNA nifH OTU4 | 1         | 11%                | Firmicutes            | 319         | CP000860                 | 99%           |
| KF901488                      | Uncultured bacterium BE326FW120712BH2 cDNA nifH OTU5 | 1         | 11%                | Uncultured bacterium  | 311         | FJ394994                 | 92%           |
| <b>McrA gene</b>              |                                                      |           |                    |                       |             |                          |               |
| KF901489                      | Uncultured archaeon BE326FW120712BH2 cDNA mcrA OTU1  | 4         | 57%                | Uncultured bacterium  | 425         | FR871734                 | 93%           |
| KF901490                      | Uncultured archaeon BE326FW120712BH2 cDNA mcrA OTU2  | 1         | 14%                | Uncultured bacterium  | 425         | FR871734                 | 93%           |
| KF901491                      | Uncultured archaeon BE326FW120712BH2 cDNA mcrA OTU3  | 1         | 14%                | Uncultured bacterium  | 425         | FR871734                 | 93%           |
| KF901492                      | Uncultured archaeon BE326FW120712BH2 cDNA mcrA OTU4  | 1         | 14%                | Uncultured bacterium  | 425         | FR871734                 | 93%           |

**Table S5. Comparison of APR and SAT abundances of sulphate-reducing bacteria (SRB) and sulphur-oxidizing bacteria (SOB).** Taxonomic identity of APR and SAT was assigned based on the top three BLASTp best-hits. Coverage of protein-encoding genes (PEGs) in metatranscriptome and number of peptidespectral matches were summed accordingly.

Keys:

SOB   SRB  

| APR | CD-HIT cluster | Annotation description                  | Taxonomic identity of the top 3 BLASTp best-hits |                                       |     | In PEG transcriptome |     | In metaproteome |  |
|-----|----------------|-----------------------------------------|--------------------------------------------------|---------------------------------------|-----|----------------------|-----|-----------------|--|
|     |                |                                         |                                                  |                                       |     | Coverage             |     | PSM             |  |
|     |                |                                         |                                                  |                                       |     | subtotal             |     | subtotal        |  |
|     | Cluster377     | adenylylsulfate reductase               | Desulfurivibrio                                  | Desulfobulbus                         | 110 | 189                  | 0   | 46              |  |
|     | Cluster580     | adenylylsulfate reductase               | Sulfuritalea                                     | Thiobacillus                          | 176 | 197                  | 74  | 122             |  |
|     | Cluster1110    | adenylylsulfate reductase               | Desulfurivibrio                                  | Desulfobulbus                         | 27  |                      | 0   |                 |  |
|     | Cluster1660    | adenylylsulfate reductase               | Desulfurivibrio                                  | Desulfobulbus                         | 52  |                      | 46  |                 |  |
|     | Cluster1739    | adenylylsulfate reductase               | Sulfuricella                                     | Sulfuritalea                          | 13  |                      | 48  |                 |  |
|     | Cluster9450    | adenylylsulfate reductase               | Sulfuricella                                     | Thiobacillus                          | 8   |                      | 0   |                 |  |
|     | Cluster11      | adenylylsulfate reductase subunit alpha | Sulfuritalea                                     | Sulfuricella                          | 598 | 615                  | 624 | 624             |  |
|     | Cluster2224    | adenylylsulfate reductase subunit alpha | Thermodesulfovibrio                              | Chlorobium                            | 3   |                      | 0   |                 |  |
|     | Cluster2831    | adenylylsulfate reductase subunit alpha | Sulfuritalea                                     | Sulfuricella                          | 15  |                      | 0   |                 |  |
|     | Cluster8147    | adenylylsulfate reductase subunit alpha | Sulfuricella                                     | Desulfurivibrio                       | 6   |                      | 0   |                 |  |
|     | Cluster9453    | adenylylsulfate reductase subunit alpha | Sulfuritalea                                     | Sulfuricella                          | 2   |                      | 0   |                 |  |
|     | Cluster3926    | adenylylsulfate reductase subunit beta  | Thermodesulfovibrio                              | Desulfobacca                          | 5   | 16                   | 0   | 0               |  |
|     | Cluster11883   | adenylylsulfate reductase subunit beta  | Desulfovibrio                                    | Thermopetrobacter                     | 11  |                      | 0   |                 |  |
|     | Cluster212     | AprA                                    | Sulfuritalea                                     | Sulfuricella                          | 299 | 354                  | 123 | 153             |  |
|     | Cluster2077    | AprA                                    | Thiobacillus                                     |                                       | 7   |                      | 19  |                 |  |
|     | Cluster8661    | AprA                                    | Sulfuritalea                                     | Sulfuricella                          | 28  |                      | 0   |                 |  |
|     | Cluster9553    | AprA                                    | Candidatus Riegeria                              | Thiolapillus                          | 4   |                      | 9   |                 |  |
|     | Cluster10159   | AprA                                    | Sulfuritalea                                     | Sulfuricella                          | 12  |                      | 0   |                 |  |
|     | Cluster12986   | AprA                                    | Thiodictyon                                      | Thiobacillus                          | 4   |                      | 2   |                 |  |
|     | Cluster200     | AprA, partial                           | Desulfocapsa                                     | Desulfobacterium                      | 45  | 53                   | 43  | 54              |  |
|     | Cluster3348    | AprA, partial                           | Desulfotomaculum                                 | Desulfosporosinus                     | 3   |                      | 10  |                 |  |
|     | Cluster7674    | AprA, partial                           | Desulfotomaculum                                 |                                       | 1   |                      | 1   |                 |  |
|     | Cluster9950    | AprA, partial                           | Desulfovibrio                                    |                                       | 4   |                      | 0   |                 |  |
|     | Cluster12111   | AprB                                    | Thiobacillus                                     | Thiodictyon                           | 323 | 323                  | 0   | 0               |  |
|     | Cluster1790    | APS reductase alpha subunit             | Cardiolucina quadra gill endosymbiont            | Codakia orbicularis gill endosymbiont | 22  | 22                   | 0   | 0               |  |
| SAT | Cluster65      | sulfate adenylyltransferase             | Thioalkalivibrio                                 |                                       | 106 | 25                   | 86  | 16              |  |
|     | Cluster1805    | sulfate adenylyltransferase             | Desulfobulbus                                    | Desulfovibrio                         | 17  | 127                  | 0   | 89              |  |
|     | Cluster2564    | sulfate adenylyltransferase             | Desulfobulbus                                    | Desulfovibrio                         | 5   |                      | 12  |                 |  |
|     | Cluster3200    | sulfate adenylyltransferase             | Magnetospira                                     | Thermopetrobacter                     | 3   |                      | 4   |                 |  |
|     | Cluster6801    | sulfate adenylyltransferase             | Thiobacillus denitrificans                       | Sulfuricella                          | 3   |                      | 0   |                 |  |
|     | Cluster10309   | sulfate adenylyltransferase             | Thiolapillus                                     | Candidatus Thiomargarita              | 18  |                      | 3   |                 |  |

|               | In PEG metatranscriptome (Total coverage) |     | In metaproteome (Total PSM) |     |
|---------------|-------------------------------------------|-----|-----------------------------|-----|
|               | SOB                                       | SRB | SOB                         | SRB |
| APR           | 1511                                      | 258 | 899                         | 100 |
| SOB:SRB ratio | 5.9                                       |     | 9.0                         |     |
| SAT           | 127                                       | 25  | 89                          | 16  |
| SOB:SRB ratio | 5.1                                       |     | 5.6                         |     |

Table S6. Summary of protein-encoding genes (PEGs) and the encoded proteins being expressed by the subsurface microorganisms.

| Protein ID                                                                                         | Abbreviation as in Figure 1 | Metabolism as in Figure 1                        | Coverage in metatranscriptome assembly | Number of peptide-spectral matches in metaproteome data |
|----------------------------------------------------------------------------------------------------|-----------------------------|--------------------------------------------------|----------------------------------------|---------------------------------------------------------|
| (2Fe-2S) ferredoxin                                                                                |                             |                                                  | 52                                     | ND                                                      |
| (2Fe-2S)-binding protein                                                                           |                             |                                                  | 55                                     | ND                                                      |
| (4Fe-4S)-binding protein                                                                           |                             |                                                  | 3                                      | ND                                                      |
| (Fe-S)-binding protein                                                                             |                             |                                                  | 41                                     | ND                                                      |
| 1-(5-phosphoribosyl)-5-[(5-phosphoribosylamino)methylideneamino] imidazole-4-carboxamide isomerase |                             |                                                  | 25                                     | ND                                                      |
| 1-(5-phosphoribosyl)-5-amino-4-imidazole-carboxylate carboxylase                                   |                             |                                                  | 2                                      | ND                                                      |
| 1-acyl-sn-glycerol-3-phosphate acyltransferase                                                     |                             |                                                  | 3                                      | ND                                                      |
| 1-deoxy-D-xylulose 5-phosphate reductoisomerase                                                    |                             |                                                  | 6                                      | ND                                                      |
| 1-deoxy-D-xylulose 5-phosphate synthase                                                            |                             |                                                  | 14                                     | 3                                                       |
| 1,4-alpha-glucan-branching protein                                                                 |                             |                                                  | 11                                     | ND                                                      |
| 12-oxophytodienoate reductase                                                                      |                             |                                                  | 5                                      | ND                                                      |
| 16S rRNA maturation RNase YbeY                                                                     |                             |                                                  | 11                                     | ND                                                      |
| 16S rRNA methyltransferase                                                                         |                             |                                                  | 18                                     | ND                                                      |
| 16S rRNA processing protein RimM                                                                   |                             |                                                  | 7                                      | ND                                                      |
| 2-alkenal reductase                                                                                |                             |                                                  | 2                                      | ND                                                      |
| 2-amino-3-ketobutyrate CoA ligase                                                                  |                             |                                                  | 4                                      | ND                                                      |
| 2-aminoethylphosphonate-pyruvate aminotransferase                                                  |                             |                                                  | 25                                     | 5                                                       |
| 2-C-methyl-D-erythritol 2,4-cyclodiphosphate synthase                                              |                             |                                                  | 17                                     | ND                                                      |
| 2-C-methyl-D-erythritol 4-phosphate cytidylyltransferase                                           |                             |                                                  | 26                                     | ND                                                      |
| 2-dehydro-3-deoxyphosphooctonate aldolase                                                          |                             |                                                  | 40                                     | ND                                                      |
| 2-dehydropantoate 2-reductase                                                                      |                             |                                                  | 1                                      | ND                                                      |
| 2-hydroxy-acid oxidase                                                                             |                             |                                                  | 8                                      | ND                                                      |
| 2-hydroxyacid dehydrogenase                                                                        |                             | C (fermentation)                                 | 14                                     | ND                                                      |
| 2-hydroxyhepta-2,4-diene-1,7-dioate isomerase                                                      |                             |                                                  | 5                                      | 13                                                      |
| 2-isopropylmalate synthase                                                                         |                             |                                                  | 657                                    | 7                                                       |
| 2-keto-3-deoxygluconate permease                                                                   |                             |                                                  | 5                                      | 24                                                      |
| 2-ketoisovalerate ferredoxin oxidoreductase subunit alpha                                          |                             |                                                  | 1                                      | ND                                                      |
| 2-nitropropane dioxygenase                                                                         | NPD                         | N                                                | 30                                     | ND                                                      |
| 2-octaprenyl-3-methyl-6-methoxy-1,4-benzoquinol hydroxylase                                        |                             |                                                  | 14                                     | ND                                                      |
| 2-oxoacid ferredoxin oxidoreductase subunit beta                                                   |                             |                                                  | 2                                      | ND                                                      |
| 2-oxoacid:acceptor oxidoreductase                                                                  |                             |                                                  | 19                                     | ND                                                      |
| 2-oxoglutarate dehydrogenase                                                                       |                             |                                                  | 42                                     | ND                                                      |
| 2-oxoglutarate ferredoxin oxidoreductase subunit alpha                                             | KOR                         | C (rTCA)                                         | 3                                      | ND                                                      |
| 2-oxoglutarate synthase, partial                                                                   | OOR                         | C (rTCA)                                         | 5                                      | ND                                                      |
| 2-oxoisovalerate dehydrogenase                                                                     |                             |                                                  | 38                                     | ND                                                      |
| 2-oxoisovalerate dehydrogenase subunit alpha                                                       |                             |                                                  | 9                                      | ND                                                      |
| 2-oxoisovalerate dehydrogenase subunit beta                                                        |                             |                                                  | 3                                      | ND                                                      |
| 2-polypropenylphenol hydroxylase                                                                   |                             |                                                  | 8                                      | ND                                                      |
| 2-succinyl-5-enolpyruvyl-6-hydroxy-3-cyclohexene-1-carboxylate synthase                            |                             |                                                  | 3                                      | ND                                                      |
| 2-succinylbenzoate-CoA ligase                                                                      |                             |                                                  | 2                                      | ND                                                      |
| 2,3-bisphosphoglycerate-independent phosphoglycerate mutase                                        | PGAM                        | C (formaldehyde assimilation via serine pathway) | 3                                      | ND                                                      |
| 2,3,4,5-tetrahydropyridine-2,6-carboxylate N-succinyltransferase                                   |                             |                                                  | 12                                     | 11                                                      |
| 23S rRNA (adenine(2503)-C(2))-methyltransferase RlmN                                               |                             |                                                  | 43                                     | ND                                                      |
| 23S rRNA methyltransferase                                                                         |                             |                                                  | 45                                     | ND                                                      |
| 3-dehydroquininate dehydratase                                                                     |                             |                                                  | 14                                     | 3                                                       |
| 3-dehydroquininate synthase                                                                        |                             |                                                  | 57                                     | ND                                                      |
| 3-demethylubiquinone-9 3-methyltransferase                                                         |                             |                                                  | 20                                     | ND                                                      |
| 3-deoxy-7-phosphoheptulonate synthase                                                              |                             |                                                  | 2                                      | ND                                                      |
| 3-deoxy-D-manno-octulosonate 8-phosphate phosphatase                                               |                             |                                                  | 5                                      | 5                                                       |
| 3-deoxy-manno-octulosonate cytidylyltransferase                                                    |                             |                                                  | 6                                      | ND                                                      |
| 3-hydroxy-2-methylbutyryl-CoA dehydrogenase                                                        |                             |                                                  | 19                                     | ND                                                      |
| 3-hydroxyacyl-CoA dehydrogenase                                                                    | HBD                         | C (3-HP/4-HB)                                    | 28                                     | ND                                                      |
| 3-hydroxybutyryl-CoA dehydrogenase                                                                 | HBD                         | C (3-HP/4-HB)                                    | 4                                      | ND                                                      |
| 3-hydroxypropionyl-CoA synthetase                                                                  | HPCS                        | C (3-HP/4-HB)                                    | 5                                      | 18                                                      |
| 3-isopropylmalate dehydratase                                                                      |                             |                                                  | 9                                      | 21                                                      |
| 3-isopropylmalate dehydratase large subunit                                                        |                             |                                                  | 4                                      | ND                                                      |
| 3-isopropylmalate dehydrogenase                                                                    |                             |                                                  | 40                                     | 22                                                      |
| 3-ketoacyl-ACP reductase                                                                           |                             |                                                  | 83                                     | ND                                                      |
| 3-ketoacyl-CoA thiolase                                                                            | 3KAT                        | C (fermentation)                                 | 61                                     | 3                                                       |
| 3-mercaptopyruvate sulfurtransferase                                                               |                             |                                                  | 21                                     | ND                                                      |
| 3-methyl-2-oxobutanoate hydroxymethyltransferase                                                   |                             |                                                  | 9                                      | ND                                                      |
| 3-octaprenyl-4-hydroxybenzoate carboxy-lyase                                                       | UbiX                        | C (hydrocarbon degradation)                      | 13                                     | ND                                                      |
| 3-octaprenyl-4-hydroxybenzoate carboxy-lyase, partial                                              | UbiX                        | C (hydrocarbon degradation)                      | 8                                      | ND                                                      |
| 3-oxoacyl-ACP synthase                                                                             |                             |                                                  | 112                                    | 6                                                       |
| 3-oxoadipate enol-lactonase                                                                        |                             |                                                  | 7                                      | ND                                                      |
| 3-phosphoglycerate dehydrogenase                                                                   |                             |                                                  | 5                                      | ND                                                      |
| 3-phosphoshikimate 1-carboxyvinyltransferase                                                       |                             |                                                  | 17                                     | ND                                                      |
| 3-polypropenyl-4-hydroxybenzoate decarboxylase                                                     |                             |                                                  | 3                                      | 2                                                       |
| 3,4-dihydroxy-2-butanone 4-phosphate synthase                                                      |                             |                                                  | 11                                     | ND                                                      |
| 3',5'-bisphosphate nucleotidase                                                                    |                             |                                                  | 16                                     | ND                                                      |
| 3',5'-cyclic-nucleotide phosphodiesterase                                                          |                             |                                                  | 4                                      | ND                                                      |
| 30S ribosomal protein S1                                                                           |                             |                                                  | 151                                    | 9                                                       |
| 30S ribosomal protein S10                                                                          |                             |                                                  | 121                                    | 8                                                       |
| 30S ribosomal protein S10, small subunit ribosomal protein S10                                     |                             |                                                  | 41                                     | ND                                                      |
| 30S ribosomal protein S11                                                                          |                             |                                                  | 45                                     | 4                                                       |
| 30S ribosomal protein S11, small subunit ribosomal protein S11                                     |                             |                                                  | 12                                     | ND                                                      |
| 30S ribosomal protein S12                                                                          |                             |                                                  | 51                                     | 13                                                      |
| 30S ribosomal protein S12 methylthiotransferase                                                    |                             |                                                  | 3                                      | ND                                                      |
| 30S ribosomal protein S13                                                                          |                             |                                                  | 123                                    | 4                                                       |
| 30S ribosomal protein S13, small subunit ribosomal protein S13                                     |                             |                                                  | 11                                     | ND                                                      |
| 30S ribosomal protein S14                                                                          |                             |                                                  | 39                                     | ND                                                      |
| 30S ribosomal protein S14, small subunit ribosomal protein S14                                     |                             |                                                  | 8                                      | ND                                                      |
| 30S ribosomal protein S15                                                                          |                             |                                                  | 8                                      | ND                                                      |
| 30S ribosomal protein S16                                                                          |                             |                                                  | 41                                     | 4                                                       |
| 30S ribosomal protein S17                                                                          |                             |                                                  | 43                                     | ND                                                      |
| 30S ribosomal protein S17, small subunit ribosomal protein S17                                     |                             |                                                  | 15                                     | ND                                                      |
| 30S ribosomal protein S18                                                                          |                             |                                                  | 28                                     | 13                                                      |
| 30S ribosomal protein S19                                                                          |                             |                                                  | 57                                     | 3                                                       |
| 30S ribosomal protein S19, small subunit ribosomal protein S19                                     |                             |                                                  | 13                                     | ND                                                      |
| 30S ribosomal protein S2                                                                           |                             |                                                  | 76                                     | 17                                                      |
| 30S ribosomal protein S20                                                                          |                             |                                                  | 49                                     | ND                                                      |
| 30S ribosomal protein S21                                                                          |                             |                                                  | 16                                     | ND                                                      |
| 30S ribosomal protein S3                                                                           |                             |                                                  | 52                                     | 8                                                       |
| 30S ribosomal protein S3, small subunit ribosomal protein S3                                       |                             |                                                  | 21                                     | ND                                                      |
| 30S ribosomal protein S30                                                                          |                             |                                                  | 7                                      | ND                                                      |
| 30S ribosomal protein S4                                                                           |                             |                                                  | 83                                     | 37                                                      |
| 30S ribosomal protein S4, small subunit ribosomal protein S4                                       |                             |                                                  | 25                                     | ND                                                      |
| 30S ribosomal protein S5                                                                           |                             |                                                  | 88                                     | ND                                                      |

|                                                                            |       |                    |     |     |
|----------------------------------------------------------------------------|-------|--------------------|-----|-----|
| 30S ribosomal protein S5, small subunit ribosomal protein S5               |       |                    | 7   | ND  |
| 30S ribosomal protein S6                                                   |       |                    | 30  | 4   |
| 30S ribosomal protein S7                                                   |       |                    | 68  | 32  |
| 30S ribosomal protein S8                                                   |       |                    | 63  | ND  |
| 30S ribosomal protein S8, small subunit ribosomal protein S8               |       |                    | 16  | ND  |
| 30S ribosomal protein S9                                                   |       |                    | 85  | ND  |
| 4-alpha-glucanotransferase                                                 |       |                    | 20  | ND  |
| 4-aminobutyrate aminotransferase                                           |       |                    | 3   | ND  |
| 4-deoxy-4-formamido-L-arabinose-phospho-UDP deformylase                    |       |                    | 3   | ND  |
| 4-diphosphocytidyl-2C-methyl-D-erythritol kinase                           |       |                    | 8   | ND  |
| 4-hydroxy-3-methylbut-2-en-1-yl diphosphate synthase                       |       |                    | 4   | 6   |
| 4-hydroxy-3-methylbut-2-enyl diphosphate reductase                         |       |                    | 5   | ND  |
| 4-hydroxy-tetrahydrodipicolinate reductase                                 |       |                    | 21  | ND  |
| 4-hydroxybenzoate polyprenyltransferase                                    |       |                    | 105 | ND  |
| 4-hydroxythreonine-4-phosphate dehydrogenase                               |       |                    | 14  | ND  |
| 4-vinyl reductase                                                          |       |                    | 2   | ND  |
| 4'-phosphopantetheinyl transferase                                         |       |                    | 3   | ND  |
| 4Fe-4S dicluster domain protein                                            |       |                    | 1   | ND  |
| 4Fe-4S ferredoxin                                                          |       |                    | 282 | 18  |
| 4Fe-4S ferredoxin iron-sulfur-binding domain protein                       |       |                    | 3   | ND  |
| 5-aminolevulinic acid synthase                                             |       |                    | 7   | ND  |
| 5-methyltetrahydropteroyltrimethylglutamate-homocysteine methyltransferase |       |                    | 21  | ND  |
| 5,10-methylenetetrahydrofolate reductase                                   | MTHFR | C (WL)             | 3   | ND  |
| 5'-methylthioadenosine phosphorylase                                       |       |                    | 8   | ND  |
| 5'-nucleotidase                                                            |       |                    | 10  | ND  |
| 50S ribosomal protein L1                                                   |       |                    | 104 | 9   |
| 50S ribosomal protein L10                                                  |       |                    | 184 | ND  |
| 50S ribosomal protein L11                                                  |       |                    | 51  | ND  |
| 50S ribosomal protein L13                                                  |       |                    | 68  | 15  |
| 50S ribosomal protein L13, large subunit ribosomal protein L13             |       |                    | 3   | ND  |
| 50S ribosomal protein L14                                                  |       |                    | 56  | 9   |
| 50S ribosomal protein L14, large subunit ribosomal protein L14             |       |                    | 13  | ND  |
| 50S ribosomal protein L15                                                  |       |                    | 87  | 5   |
| 50S ribosomal protein L15, large subunit ribosomal protein L15             |       |                    | 6   | ND  |
| 50S ribosomal protein L16                                                  |       |                    | 58  | 7   |
| 50S ribosomal protein L17                                                  |       |                    | 79  | 4   |
| 50S ribosomal protein L17, large subunit ribosomal protein L17             |       |                    | 5   | ND  |
| 50S ribosomal protein L18                                                  |       |                    | 73  | ND  |
| 50S ribosomal protein L19                                                  |       |                    | 70  | ND  |
| 50S ribosomal protein L2                                                   |       |                    | 79  | ND  |
| 50S ribosomal protein L2, large subunit ribosomal protein L2               |       |                    | 5   | ND  |
| 50S ribosomal protein L20                                                  |       |                    | 39  | ND  |
| 50S ribosomal protein L21                                                  |       |                    | 66  | ND  |
| 50S ribosomal protein L22                                                  |       |                    | 42  | 4   |
| 50S ribosomal protein L22, large subunit ribosomal protein L22             |       |                    | 13  | ND  |
| 50S ribosomal protein L23                                                  |       |                    | 120 | ND  |
| 50S ribosomal protein L23, large subunit ribosomal protein L23             |       |                    | 3   | ND  |
| 50S ribosomal protein L24                                                  |       |                    | 56  | ND  |
| 50S ribosomal protein L24, large subunit ribosomal protein L24             |       |                    | 20  | ND  |
| 50S ribosomal protein L25                                                  |       |                    | 45  | 3   |
| 50S ribosomal protein L27                                                  |       |                    | 67  | ND  |
| 50S ribosomal protein L28                                                  |       |                    | 45  | 2   |
| 50S ribosomal protein L29                                                  |       |                    | 65  | ND  |
| 50S ribosomal protein L29, large subunit ribosomal protein L29             |       |                    | 2   | ND  |
| 50S ribosomal protein L3                                                   |       |                    | 95  | ND  |
| 50S ribosomal protein L3, large subunit ribosomal protein L3               |       |                    | 25  | ND  |
| 50S ribosomal protein L30                                                  |       |                    | 26  | 3   |
| 50S ribosomal protein L30, large subunit ribosomal protein L30             |       |                    | 18  | ND  |
| 50S ribosomal protein L31                                                  |       |                    | 25  | ND  |
| 50S ribosomal protein L31 type B                                           |       |                    | 3   | ND  |
| 50S ribosomal protein L32                                                  |       |                    | 26  | ND  |
| 50S ribosomal protein L33                                                  |       |                    | 29  | ND  |
| 50S ribosomal protein L34                                                  |       |                    | 1   | ND  |
| 50S ribosomal protein L35                                                  |       |                    | 11  | ND  |
| 50S ribosomal protein L4                                                   |       |                    | 118 | 11  |
| 50S ribosomal protein L4, large subunit ribosomal protein L4               |       |                    | 18  | ND  |
| 50S ribosomal protein L5                                                   |       |                    | 103 | 49  |
| 50S ribosomal protein L5, large subunit ribosomal protein L5               |       |                    | 6   | 5   |
| 50S ribosomal protein L6                                                   |       |                    | 89  | ND  |
| 50S ribosomal protein L6, large subunit ribosomal protein L6               |       |                    | 10  | ND  |
| 50S ribosomal protein L7/L12                                               |       |                    | 133 | 18  |
| 50S ribosomal protein L9                                                   |       |                    | 29  | ND  |
| 50S rRNA methyltransferase                                                 |       |                    | 25  | 33  |
| 6-phosphofructokinase                                                      | PFK   | C (EMP Glycolysis) | 142 | 155 |
| 6-phosphogluconate dehydrogenase                                           |       |                    | 23  | ND  |
| 6-phosphogluconolactonase                                                  |       |                    | 3   | ND  |
| 6,7-dimethyl-8-ribitylumazine synthase                                     |       |                    | 10  | 16  |
| 60 kDa chaperonin                                                          |       |                    | 4   | ND  |
| 60 kDa chaperonin, partial                                                 |       |                    | 17  | 180 |
| 7-cyano-7-deazaguanine reductase                                           |       |                    | 6   | ND  |
| 7-cyano-7-deazaguanine synthase                                            |       |                    | 2   | ND  |
| 70 kDa heat shock protein, partial                                         |       |                    | 8   | ND  |
| ABC transport system, permease component YbhS                              |       |                    | 2   | ND  |
| ABC transporter                                                            |       |                    | 277 | 13  |
| ABC transporter ATP-binding protein                                        |       |                    | 55  | ND  |
| ABC transporter ATP-binding protein, partial                               |       |                    | 5   | ND  |
| ABC transporter permease                                                   |       |                    | 276 | 8   |
| ABC transporter permease, partial                                          |       |                    | 17  | ND  |
| ABC transporter related protein                                            |       |                    | 4   | ND  |
| ABC transporter substrate-binding protein                                  |       |                    | 421 | 151 |
| ABC transporter substrate-binding protein family 5                         |       |                    | 2   | ND  |
| ABC-2 type transporter                                                     |       |                    | 2   | ND  |
| ABC-type dipeptide transport system, periplasmic component                 |       |                    | 4   | ND  |
| ABC-type multidrug transport system, ATPase component                      |       |                    | 1   | ND  |
| ABC-type phosphate/phosphonate transport system, periplasmic component     |       |                    | 5   | ND  |
| AbrB family transcriptional regulator                                      |       |                    | 6   | 14  |
| acetate kinase                                                             | ACK   | C                  | 2   | ND  |
| acetoacetate metabolism regulatory protein AtoC                            |       |                    | 2   | ND  |
| acetoacetyl-CoA reductase                                                  |       |                    | 17  | 2   |
| acetoacetyl-CoA synthetase                                                 |       | C (fermentation)   | 36  | ND  |
| acetoacetyl-CoA synthetase                                                 |       |                    | 13  | ND  |
| acetoacetyl-CoA synthetase                                                 |       |                    | 33  | 41  |
| acetoacetyl-CoA synthetase                                                 |       |                    | 6   | ND  |

|                                                                  |              |  |                                          |     |     |
|------------------------------------------------------------------|--------------|--|------------------------------------------|-----|-----|
| acetyl-CoA acetyltransferase                                     |              |  | C (fermentation)                         | 104 | 5   |
| acetyl-CoA carboxylase                                           | ACC          |  | C (3-HP/4-HB)                            | 26  | ND  |
| acetyl-CoA carboxylase carboxyltransferase subunit beta          | ACC          |  | C (3-HP/4-HB)                            | 5   | ND  |
| acetyl-CoA carboxylase subunit alpha                             | ACC          |  | C (3-HP/4-HB)                            | 39  | ND  |
| acetyl-CoA carboxylase subunit beta                              | ACC          |  | C (3-HP/4-HB)                            | 4   | ND  |
| acetyl-CoA carboxylase, partial                                  | ACC          |  | C (3-HP/4-HB)                            | 7   | ND  |
| acetyl-CoA decarboxylase                                         | ACDS         |  | C (WL)                                   | 27  | 2   |
| acetyl-CoA synthase subunit gamma                                | ACDS         |  | C (WL)                                   | 6   | ND  |
| acetyl-CoA synthetase                                            | ACStase      |  | C (fermentation)                         | 98  | 14  |
| acetylglutamate kinase                                           |              |  |                                          | 36  | ND  |
| acetylmethionine aminotransferase                                |              |  |                                          | 34  | 15  |
| acetyltransferase                                                |              |  |                                          | 15  | ND  |
| aconitate hydratase                                              | ACN          |  | C (rTCA)                                 | 3   | ND  |
| acriflavin resistance protein                                    |              |  |                                          | 4   | ND  |
| acriflavine resistance protein B                                 |              |  |                                          | 3   | ND  |
| actin                                                            |              |  |                                          | 1   | ND  |
| acyl carrier protein                                             |              |  |                                          | 52  | 16  |
| acyl-CoA ligase                                                  |              |  |                                          | 34  | ND  |
| acyl-CoA dehydrogenase                                           | CAD          |  | C (fermentation)                         | 106 | ND  |
| acyl-CoA thioesterase                                            |              |  |                                          | 9   | ND  |
| acyl-phosphate glycerol 3-phosphate acyltransferase              |              |  |                                          | 99  | ND  |
| acyltransferase                                                  |              |  |                                          | 15  | 5   |
| addiction module antitoxin                                       |              |  |                                          | 24  | ND  |
| addiction module protein                                         |              |  |                                          | 5   | ND  |
| adenosine-5'-phosphosulfate reductase alpha subunit              | assimilation |  | S                                        | 6   | 25  |
| adenosine-5'-phosphosulfate reductase alpha subunit, partial     | assimilation |  | S                                        | 4   | ND  |
| adenosine-5'-phosphosulfate reductase, partial                   | assimilation |  | S                                        | 17  | ND  |
| adenosylcobinamide kinase                                        |              |  |                                          | 4   | ND  |
| adenosylhomocysteinase                                           |              |  |                                          | 4   | ND  |
| adenosylmethionine--8-amino-7-oxononanoate aminotransferase BioA |              |  |                                          | 8   | ND  |
| adenylate cyclase                                                |              |  |                                          | 7   | ND  |
| adenylate kinase                                                 |              |  |                                          | 37  | 31  |
| adenylate/guanylate cyclase                                      |              |  |                                          | 5   | ND  |
| adenylosuccinate lyase                                           |              |  |                                          | 26  | 4   |
| adenylosuccinate synthetase                                      |              |  |                                          | 29  | 38  |
| adenyllyl cyclase                                                |              |  |                                          | 5   | ND  |
| adenyllysulfate kinase                                           |              |  |                                          | 22  | ND  |
| adenyllysulfate reductase                                        | APR          |  | S                                        | 386 | 168 |
| adenyllysulfate reductase subunit alpha                          | APR          |  | S                                        | 624 | 624 |
| adenyllysulfate reductase subunit beta                           | APR          |  | S                                        | 16  | ND  |
| adhesin                                                          |              |  |                                          | 18  | ND  |
| adk, adenylylase, adenylylase                                    |              |  |                                          | 14  | ND  |
| ADP-heptose synthase                                             |              |  |                                          | 31  | ND  |
| ADP-heptose--LPS heptosyltransferase                             |              |  |                                          | 10  | ND  |
| ADP-L-glycero-D-manno-heptose-6-epimerase                        |              |  |                                          | 8   | ND  |
| ADP-ribose pyrophosphatase                                       |              |  |                                          | 3   | ND  |
| ADP-ribosyl-(dinitrogen reductase) hydrolase                     |              |  |                                          | 12  | ND  |
| agglutinin biogenesis protein MshI                               |              |  |                                          | 5   | ND  |
| alanine dehydrogenase                                            |              |  |                                          | 9   | ND  |
| alanine racemase                                                 |              |  |                                          | 3   | ND  |
| alanyl-tRNA synthetase                                           |              |  |                                          | 52  | ND  |
| alanyl-tRNA synthetase, partial                                  |              |  |                                          | 11  | ND  |
| alcohol dehydrogenase                                            | ADH          |  | C (fermentation/hydrocarbon degradation) | 32  | ND  |
| aldehyde dehydrogenase                                           | ALDH         |  | C (hydrocarbon degradation)              | 4   | ND  |
| aldehyde ferredoxin oxidoreductase                               |              |  | C (formaldehyde oxidation)               | 45  | ND  |
| aldehyde-activating protein                                      |              |  |                                          | 1   | ND  |
| aldehyde:ferredoxin oxidoreductase                               |              |  |                                          | 12  | ND  |
| aldolase                                                         |              |  |                                          | 69  | ND  |
| aldose epimerase                                                 |              |  |                                          | 30  | 6   |
| alkaline phosphatase                                             |              |  |                                          | 69  | 6   |
| alkyl hydroperoxide reductase                                    |              |  |                                          | 420 | 8   |
| alkyl hydroperoxide reductase subunit C                          |              |  |                                          | 318 | 26  |
| alkyl hydroperoxide reductase subunit F                          |              |  |                                          | 205 | ND  |
| alkyl hydroperoxide reductase, partial                           |              |  |                                          | 25  | ND  |
| alkylphosphonate ABC transporter substrate-binding protein       |              |  |                                          | 48  | 31  |
| Alpha amylase catalytic region                                   |              |  | C (starch)                               | 10  | ND  |
| alpha-amylase                                                    |              |  | C (starch)                               | 49  | ND  |
| alpha-glucan phosphorylase                                       |              |  |                                          | 81  | 14  |
| alpha, alpha-trehalose-phosphate synthase                        |              |  |                                          | 2   | ND  |
| alpha/beta hydrolase                                             |              |  |                                          | 399 | ND  |
| amidase                                                          |              |  |                                          | 6   | ND  |
| amidophosphoribosyltransferase                                   |              |  |                                          | 14  | ND  |
| amino acid ABC transporter                                       |              |  |                                          | 2   | ND  |
| amino acid ABC transporter ATPase                                |              |  |                                          | 2   | ND  |
| amino acid ABC transporter substrate-binding protein             |              |  |                                          | 22  | 19  |
| amino acid acetyltransferase                                     |              |  |                                          | 6   | ND  |
| amino acid dehydrogenase                                         |              |  |                                          | 8   | ND  |
| amino acid-binding protein                                       |              |  |                                          | 4   | 16  |
| aminobenzoyl-glutamate transporter                               |              |  |                                          | 1   | ND  |
| aminodeoxychorismate lyase                                       |              |  |                                          | 4   | ND  |
| aminoglycoside phosphotransferase                                |              |  |                                          | 15  | ND  |
| aminopeptidase A                                                 |              |  |                                          | 5   | ND  |
| aminotransferase                                                 |              |  |                                          | 33  | 6   |
| aminotransferase DegT                                            |              |  |                                          | 3   | ND  |
| ammonia channel protein                                          |              |  |                                          | 11  | ND  |
| ammonia monooxygenase                                            | AMO          |  | N                                        | 9   | ND  |
| AmoA-like protein, partial                                       | AMO          |  | N                                        | 16  | ND  |
| AMP-dependent synthetase                                         |              |  |                                          | 89  | 17  |
| Amylopullulanase precursor                                       |              |  |                                          | 6   | ND  |
| anaerobic benzoate catabolism transcriptional regulator          |              |  |                                          | 2   | ND  |
| Ankyrin                                                          |              |  |                                          | 15  | ND  |
| anthranilate phosphoribosyltransferase                           |              |  |                                          | 14  | ND  |
| anthranilate synthase component I                                |              |  |                                          | 11  | ND  |
| anthranilate synthase subunit I                                  |              |  |                                          | 1   | ND  |
| anti sigma-E protein, RseA                                       |              |  |                                          | 71  | ND  |
| anti-sigma factor antagonist                                     |              |  |                                          | 16  | ND  |
| anti-sigma-factor antagonist                                     |              |  |                                          | 38  | ND  |
| antitoxin                                                        |              |  |                                          | 27  | ND  |
| antitoxin HicB                                                   |              |  |                                          | 9   | ND  |
| apolipoprotein acyltransferase                                   |              |  |                                          | 4   | ND  |
| AprA                                                             | APR          |  | S                                        | 371 | 158 |
| AprA, partial                                                    | APR          |  | S                                        | 53  | 53  |
| AprB                                                             | APR          |  | S                                        | 323 | ND  |

|                                                                                                            |      |          |     |     |
|------------------------------------------------------------------------------------------------------------|------|----------|-----|-----|
| APS reductase alpha subunit                                                                                | APR  | S        | 22  | ND  |
| arabinose 5-phosphate isomerase                                                                            |      |          | 9   | ND  |
| argininosuccinate lyase                                                                                    |      |          | 31  | 3   |
| argininosuccinate synthase                                                                                 |      |          | 20  | 11  |
| arginyl-tRNA synthetase                                                                                    |      |          | 23  | 7   |
| arginyl-tRNA-protein transferase                                                                           |      |          | 11  | ND  |
| aromatic acid decarboxylase                                                                                |      |          | 13  | ND  |
| aromatic amino acid aminotransferase                                                                       |      |          | 23  | ND  |
| aromatic hydrocarbon degradation protein                                                                   |      |          | 164 | 115 |
| arsenate reductase                                                                                         |      |          | 19  | ND  |
| arsenic ABC transporter ATPase                                                                             |      |          | 3   | ND  |
| arsenic resistance protein ArsB                                                                            |      |          | 2   | ND  |
| arsenic transporter                                                                                        |      |          | 6   | ND  |
| arsenite S-adenosylmethyltransferase                                                                       |      |          | 1   | ND  |
| arsenite transporter                                                                                       |      |          | 5   | ND  |
| arsenite transporter, partial                                                                              |      |          | 5   | ND  |
| arsenite-activated ATPase ArsA                                                                             |      |          | 16  | ND  |
| ArsR family transcriptional regulator                                                                      |      |          | 75  | 7   |
| arylsulfate sulfotransferase                                                                               |      |          | 78  | ND  |
| AsnC family transcriptional regulator                                                                      |      |          | 26  | ND  |
| asparagine synthase                                                                                        |      |          | 27  | 3   |
| aspartate aminotransferase                                                                                 |      |          | 12  | ND  |
| aspartate carbamoyltransferase                                                                             |      |          | 3   | ND  |
| aspartate carbamoyltransferase catalytic subunit                                                           |      |          | 3   | 7   |
| aspartate kinase                                                                                           |      |          | 93  | ND  |
| aspartate-semialdehyde dehydrogenase                                                                       |      |          | 29  | 129 |
| Aspartate/tyrosine/aromatic aminotransferase-like protein                                                  |      |          | 1   | ND  |
| aspartokinase                                                                                              |      |          | 4   | 3   |
| aspartyl protease                                                                                          |      |          | 28  | ND  |
| aspartyl-tRNA amidotransferase subunit B                                                                   |      |          | 5   | ND  |
| aspartyl-tRNA synthetase                                                                                   |      |          | 15  | ND  |
| ATP F0F1 synthase subunit alpha                                                                            |      |          | 34  | ND  |
| ATP F0F1 synthase subunit beta                                                                             |      |          | 2   | ND  |
| ATP F0F1 synthase subunit C                                                                                |      |          | 13  | ND  |
| ATP F0F1 synthase subunit delta                                                                            |      |          | 6   | ND  |
| ATP F0F1 synthase subunit gamma                                                                            |      |          | 12  | ND  |
| ATP phosphoribosyltransferase                                                                              |      |          | 14  | ND  |
| ATP phosphoribosyltransferase catalytic subunit                                                            |      |          | 14  | ND  |
| ATP phosphoribosyltransferase regulatory subunit                                                           |      |          | 28  | 2   |
| ATP synthase F0, A subunit                                                                                 |      |          | 3   | ND  |
| ATP synthase F0F1 subunit A                                                                                |      |          | 7   | ND  |
| ATP synthase F0F1 subunit beta                                                                             |      |          | 51  | 15  |
| ATP synthase F0F1 subunit C                                                                                |      |          | 60  | ND  |
| ATP synthase F0F1 subunit epsilon                                                                          |      |          | 43  | ND  |
| ATP synthase subunit A                                                                                     |      |          | 50  | ND  |
| ATP synthase subunit alpha                                                                                 |      |          | 7   | ND  |
| ATP synthase subunit B                                                                                     |      |          | 87  | ND  |
| ATP synthase subunit C                                                                                     |      |          | 7   | ND  |
| ATP synthase subunit gamma                                                                                 |      |          | 2   | ND  |
| ATP synthase, F0 subunit b                                                                                 |      |          | 4   | ND  |
| ATP--cobalamin adenosyltransferase                                                                         |      |          | 3   | ND  |
| ATP-binding protein                                                                                        |      |          | 65  | ND  |
| ATP-dependent chaperone ClpB                                                                               |      |          | 6   | ND  |
| ATP-dependent Clp protease ATP-binding protein                                                             |      |          | 31  | ND  |
| ATP-dependent Clp protease ATP-binding subunit ClpX                                                        |      |          | 13  | ND  |
| ATP-dependent Clp protease proteolytic subunit                                                             |      |          | 34  | 6   |
| ATP-dependent dehydrobiotin synthase BioD                                                                  |      |          | 2   | ND  |
| ATP-dependent DNA helicase RecQ                                                                            |      |          | 2   | ND  |
| ATP-dependent DNA helicase RuvB                                                                            |      |          | 9   | 6   |
| ATP-dependent metalloprotease                                                                              |      |          | 24  | ND  |
| ATP-dependent metalloprotease FtsH                                                                         |      |          | 30  | ND  |
| ATP-dependent OLD family endonuclease, partial                                                             |      |          | 6   | ND  |
| ATP-dependent protease                                                                                     |      |          | 99  | ND  |
| ATP-dependent protease ATP-binding subunit ClpX                                                            |      |          | 3   | ND  |
| ATP-dependent protease ATP-binding subunit HslU                                                            |      |          | 28  | ND  |
| ATP-dependent protease La                                                                                  |      |          | 79  | 56  |
| ATP-dependent protease subunit HslV                                                                        |      |          | 6   | ND  |
| ATP-dependent protease, partial                                                                            |      |          | 8   | ND  |
| ATP-dependent Zn protease                                                                                  |      |          | 13  | ND  |
| ATP-synthase beta chain, partial                                                                           |      |          | 17  | 8   |
| ATPase                                                                                                     |      |          | 93  | 5   |
| ATPase AAA                                                                                                 |      |          | 204 | 44  |
| ATPase P                                                                                                   |      |          | 7   | ND  |
| autotransporter                                                                                            |      |          | 1   | ND  |
| AzIC family protein                                                                                        |      |          | 4   | ND  |
| B12-dependent methionine synthase                                                                          |      |          | 11  | ND  |
| bacterial extracellular solute-binding proteins, family 5 Middle                                           |      |          | 15  | 34  |
| bacterioferritin                                                                                           |      |          | 38  | ND  |
| bacterioferritin-associated ferredoxin                                                                     |      |          | 16  | ND  |
| barnase inhibitor                                                                                          |      |          | 6   | ND  |
| basic membrane lipoprotein                                                                                 |      |          | 6   | ND  |
| benzoate transporter                                                                                       |      |          | 25  | ND  |
| benzoyl-CoA oxygenase                                                                                      |      |          | 3   | ND  |
| benzoyl-CoA dihydrodiol lyase                                                                              |      |          | 11  | ND  |
| beta-galactosidase                                                                                         |      |          | 2   | ND  |
| beta-hexosaminidase                                                                                        |      |          | 4   | ND  |
| beta-ketoacyl synthase                                                                                     |      |          | 5   | ND  |
| bifunctional 5,10-methylene-tetrahydrofolate dehydrogenase/5,10-methylene-tetrahydrofolate cyclohydrolase  | MTD  | C (WL)   | 2   | ND  |
| bifunctional acetyl-CoA decarboxylase/synthase complex subunit alpha/beta                                  | ACDS | C (WL)   | 30  | 5   |
| bifunctional aconitate hydratase 2/2-methylisocitrate dehydratase                                          | ACN  | C (rTCA) | 34  | 7   |
| Bifunctional hemolysin/adenylyate cyclase                                                                  |      |          | 1   | ND  |
| bifunctional N-acetylglucosamine-1-phosphate uridylyltransferase/glucosamine-1-phosphate acetyltransferase |      |          | 41  | ND  |
| bilirubin oxidase                                                                                          |      |          | 2   | ND  |
| binding-protein-dependent transporter system inner membrane protein                                        |      |          | 10  | ND  |
| biopolymer transporter ExbB                                                                                |      |          | 19  | ND  |
| biopolymer transporter ExbD                                                                                |      |          | 27  | ND  |
| biotin synthase                                                                                            |      |          | 24  | ND  |
| biotin--[acetyl-CoA-carboxylase] synthetase                                                                |      |          | 9   | ND  |
| Blue (Type 1) copper domain protein                                                                        |      |          | 5   | ND  |
| BolA family transcriptional regulator                                                                      |      |          | 11  | ND  |
| bon domain-containing protein                                                                              |      |          | 2   | ND  |
| branched-chain alpha-keto acid dehydrogenase subunit E2                                                    |      |          | 424 | ND  |
| branched-chain amino acid ABC transporter ATP-binding protein                                              |      |          | 14  | ND  |



|                                                                     |      |        |      |      |
|---------------------------------------------------------------------|------|--------|------|------|
| branched-chain amino acid ABC transporter permease                  |      |        | 4    | ND   |
| branched-chain amino acid ABC transporter substrate-binding protein |      |        | 110  | 38   |
| branched-chain amino acid aminotransferase                          |      |        | 38   | 63   |
| C4-dicarboxylate ABC transporter                                    |      |        | 213  | 53   |
| C4-dicarboxylate ABC transporter permease                           |      |        | 11   | ND   |
| C4-dicarboxylate ABC transporter substrate-binding protein          |      |        | 37   | 6    |
| CAAX amino protease                                                 |      |        | 7    | ND   |
| cag pathogenicity island protein Cag6                               |      |        | 6    | ND   |
| calcium-binding protein                                             |      |        | 19   | ND   |
| camphor resistance protein CreB                                     |      |        | 1    | ND   |
| capsular biosynthesis protein                                       |      |        | 13   | ND   |
| capsule biosynthesis protein CapD, partial                          |      |        | 3    | ND   |
| carbamoyl phosphate synthase large subunit                          |      |        | 40   | ND   |
| carbamoyl phosphate synthase small subunit                          |      |        | 25   | ND   |
| carbamoyltransferase                                                |      |        | 4    | ND   |
| carbon monoxide dehydrogenase                                       | CODH | C (WL) | 36   | ND   |
| carbon storage regulator                                            |      |        | 1    | ND   |
| carbon-phosphorus lyase                                             |      |        | 113  | 17   |
| carbon-phosphorus lyase complex subunit                             |      |        | 19   | ND   |
| carbon-phosphorus lyase complex subunit PhnJ                        |      |        | 121  | ND   |
| carbonate dehydratase                                               |      |        | 52   | ND   |
| carbonic anhydrase                                                  |      |        | 25   | ND   |
| carboxy-terminal-processing protease                                |      |        | 3    | ND   |
| carboxyl-terminal protease                                          |      |        | 9    | ND   |
| carboxylase                                                         |      |        | 2    | ND   |
| carboxylesterase                                                    |      |        | 7    | ND   |
| carboxymethylenebutenolidase                                        |      |        | 32   | 16   |
| carboxypeptidase                                                    |      |        | 1    | ND   |
| carboxysome shell protein                                           |      |        | 635  | 3059 |
| CarD family transcriptional regulator                               |      |        | 19   | ND   |
| catalase                                                            |      |        | 9    | ND   |
| catalase-peroxidase                                                 |      |        | 1775 | 75   |
| catalase/hydroperoxidase HPI(I)                                     |      |        | 161  | 4    |
| cation diffusion facilitator transporter                            |      |        | 12   | ND   |
| cation tolerance protein CutA                                       |      |        | 5    | ND   |
| cation transporter                                                  |      |        | 179  | 2    |
| cation-transporting ATPase                                          |      |        | 3    | ND   |
| cation:proton antiporter                                            |      |        | 71   | ND   |
| cbb3-type cytochrome c oxidase subunit I                            |      |        | 94   | ND   |
| CBS-domain-containing membrane protein                              |      |        | 4    | ND   |
| cd1 nitrite reductase                                               | NIR  | N      | 2    | ND   |
| CDP-diacylglycerol--glycerol-3-phosphate 3-phosphatidyltransferase  |      |        | 10   | ND   |
| CDP-diacylglycerol--serine O-phosphatidyltransferase                |      |        | 7    | ND   |
| cell division protein                                               |      |        | 21   | ND   |
| cell division protein DedD                                          |      |        | 3    | ND   |
| cell division protein FtsA                                          |      |        | 14   | ND   |
| cell division protein FtsB                                          |      |        | 2    | ND   |
| cell division protein FtsE                                          |      |        | 5    | ND   |
| cell division protein FtsH                                          |      |        | 139  | ND   |
| cell division protein FtsK                                          |      |        | 55   | ND   |
| cell division protein FtsQ                                          |      |        | 5    | ND   |
| cell division protein FtsW                                          |      |        | 4    | ND   |
| cell division protein FtsX                                          |      |        | 23   | ND   |
| cell division protein FtsY                                          |      |        | 2    | ND   |
| cell division protein FtsZ                                          |      |        | 12   | ND   |
| cell division protein ZipA                                          |      |        | 1    | ND   |
| cell envelope biogenesis protein TonB                               |      |        | 8    | ND   |
| cell shape determination protein CcmA                               |      |        | 61   | 8    |
| cell surface protein                                                |      |        | 4    | 4    |
| cell surface protein SprA                                           |      |        | 4    | ND   |
| cell wall-binding protein, partial                                  |      |        | 5    | ND   |
| chain-length-determining protein                                    |      |        | 59   | ND   |
| chain-length-determining protein                                    |      |        | 17   | ND   |
| channel protein TolC                                                |      |        | 33   | ND   |
| Chaperone protein DnaJ                                              |      |        | 3    | ND   |
| chaperonin GroEL                                                    |      |        | 87   | 27   |
| chaperonin GroL                                                     |      |        | 5    | ND   |
| chaperonin like family GroEL-, partial                              |      |        | 2    | 8    |
| chemotaxis protein                                                  |      |        | 46   | ND   |
| chemotaxis protein CheA                                             |      |        | 154  | 33   |
| chemotaxis protein CheA, partial                                    |      |        | 17   | ND   |
| chemotaxis protein CheB                                             |      |        | 2    | ND   |
| chemotaxis protein CheC                                             |      |        | 2    | ND   |
| chemotaxis protein CheR                                             |      |        | 7    | ND   |
| chemotaxis protein CheW                                             |      |        | 5    | ND   |
| chemotaxis protein CheX                                             |      |        | 2    | ND   |
| chemotaxis protein CheY                                             |      |        | 419  | 28   |
| chemotaxis protein CheZ                                             |      |        | 79   | 3    |
| chemotaxis protein MotB                                             |      |        | 1    | ND   |
| chemotaxis protein, partial                                         |      |        | 11   | ND   |
| chemotaxis regulator CheZ                                           |      |        | 3    | ND   |
| CheW domain protein                                                 |      |        | 2    | ND   |
| chloride channel protein                                            |      |        | 8    | ND   |
| chlorite dismutase                                                  |      |        | 2    | ND   |
| chorismate mutase                                                   |      |        | 3    | ND   |
| chorismate synthase                                                 |      |        | 47   | ND   |
| chromate resistance protein                                         |      |        | 3    | ND   |
| chromosomal replication initiator protein DnaA                      |      |        | 19   | ND   |
| chromosome condensation regulator RCC1                              |      |        | 5    | ND   |
| chromosome partitioning protein                                     |      |        | 3    | ND   |
| chromosome partitioning protein ParA                                |      |        | 8    | ND   |
| chromosome partitioning protein ParB                                |      |        | 18   | ND   |
| chromosome partitioning protein Smc                                 |      |        | 18   | ND   |
| chromosome replication initiation protein DnaA                      |      |        | 4    | ND   |
| chromosome segregation protein SMC                                  |      |        | 41   | ND   |
| citrate transporter                                                 |      |        | 3    | ND   |
| class I heat-shock protein, partial                                 |      |        | 4    | 5    |
| class III cytochrome c                                              |      |        | 16   | ND   |
| class III cytochrome c family protein                               |      |        | 13   | ND   |
| class V aminotransferase                                            |      |        | 46   | 6    |
| Clp protease ATP-binding protein                                    |      |        | 109  | 11   |
| Clp protease ClpC, partial                                          |      |        | 9    | ND   |
| Clp protease ClpP                                                   |      |        | 6    | ND   |

|                                                                               |        |   |      |     |
|-------------------------------------------------------------------------------|--------|---|------|-----|
| Clp protease ClpS                                                             |        |   | 25   | ND  |
| Clp protease ClpX                                                             |        |   | 37   | ND  |
| Clp protease ClpX, partial                                                    |        |   | 31   | ND  |
| co-chaperone GrpE                                                             |        |   | 6    | ND  |
| co-chaperone HscB                                                             |        |   | 4    | ND  |
| CoA-binding protein                                                           |        |   | 19   | ND  |
| CoA-substrate-specific enzyme activase                                        |        |   | 1    | ND  |
| CoA-transferase, partial                                                      |        |   | 4    | ND  |
| cob(D)alamin adenosyltransferase/cobinamide ATP-dependent adenosyltransferase |        |   | 5    | ND  |
| cobalamin                                                                     |        |   | 10   | ND  |
| cobalamin biosynthesis protein CbiG                                           |        |   | 4    | ND  |
| cobalamin biosynthesis protein CbiX                                           |        |   | 2    | ND  |
| cobalamin biosynthesis protein CobD                                           |        |   | 13   | ND  |
| cobalt transporter                                                            |        |   | 67   | ND  |
| cobalt-precorrin-4 C(11)-methyltransferase                                    |        |   | 2    | ND  |
| cobalt-precorrin-6A synthase                                                  |        |   | 3    | ND  |
| cobyric acid synthase                                                         |        |   | 2    | ND  |
| cobyric acid synthase CobQ                                                    |        |   | 17   | ND  |
| cobyric acid a,c-diamide synthase                                             |        |   | 55   | 2   |
| cold-shock DNA-binding protein family                                         |        |   | 136  | ND  |
| cold-shock protein                                                            |        |   | 192  | ND  |
| colicin V production protein                                                  |        |   | 4    | ND  |
| competence protein                                                            |        |   | 57   | ND  |
| competence protein ComEA                                                      |        |   | 4    | ND  |
| competence protein ComJ                                                       |        |   | 6    | ND  |
| competence protein ComL                                                       |        |   | 20   | 5   |
| competence/damage-inducible protein ClnA C-terminal domain                    |        |   | 1    | ND  |
| conjugal transfer protein TraI                                                |        |   | 2    | ND  |
| conjugal transfer protein TraW                                                |        |   | 1    | ND  |
| conserved hypothetical protein                                                |        |   | 137  | 128 |
| conserved hypothetical protein, cofD-related                                  |        |   | 3    | ND  |
| conserved protein of unknown function                                         |        |   | 153  | ND  |
| CopG family transcriptional regulator                                         |        |   | 27   | ND  |
| copper ABC transporter ATPase                                                 |        |   | 21   | ND  |
| copper ABC transporter substrate-binding protein                              |        |   | 40   | ND  |
| copper amine oxidase                                                          |        |   | 11   | 105 |
| coproporphyrinogen III oxidase                                                |        |   | 41   | 16  |
| Cpm60, partial                                                                |        |   | 7    | ND  |
| CpXC protein                                                                  |        |   | 3    | ND  |
| CRISPR-associated protein                                                     | CRISPR |   | 10   | ND  |
| CRISPR-associated protein Cas3                                                | CRISPR |   | 9    | ND  |
| CRISPR-associated protein Csd1                                                | CRISPR |   | 3    | ND  |
| CRISPR-associated protein Csd2                                                | CRISPR |   | 4    | ND  |
| CRISPR-associated protein Csh2                                                | CRISPR |   | 7    | ND  |
| CRISPR-associated protein Csn1                                                | CRISPR |   | 13   | ND  |
| crossover junction endodeoxyribonuclease RuvC                                 |        |   | 5    | ND  |
| crotonase                                                                     |        |   | 30   | ND  |
| Crp/Fnr family transcriptional regulator                                      |        |   | 65   | 5   |
| CTP synthase                                                                  |        |   | 16   | ND  |
| cupin                                                                         |        |   | 25   | ND  |
| cupin 2 barrel domain-containing protein, partial                             |        |   | 2    | ND  |
| cyanophycin synthetase                                                        |        |   | 83   | ND  |
| Cyc3p                                                                         |        |   | 2    | ND  |
| cyclase                                                                       |        |   | 7    | ND  |
| cyclic nucleotide-binding protein                                             |        |   | 41   | 5   |
| cyclophilin                                                                   |        |   | 13   | 4   |
| cyclophilin type peptidyl-prolyl cis-trans isomerase                          |        |   | 5    | ND  |
| cyclopropane fatty acyl phospholipid synthase                                 |        |   | 7    | ND  |
| cyclopropane-fatty-acyl-phospholipid synthase                                 |        |   | 6    | ND  |
| cystathionine gamma-synthase                                                  |        |   | 3    | ND  |
| cysteine desulfurase                                                          |        |   | 288  | ND  |
| cysteine hydrolase                                                            |        |   | 4    | ND  |
| cysteine methyltransferase                                                    |        |   | 5    | ND  |
| cysteine peptidase                                                            |        |   | 1    | ND  |
| cysteine synthase                                                             |        |   | 28   | 14  |
| cysteinyl-tRNA synthetase                                                     |        |   | 22   | ND  |
| cytidylate kinase                                                             |        |   | 12   | ND  |
| cytochrome B                                                                  |        |   | 92   | ND  |
| cytochrome b subunit of the bc complex                                        |        |   | 3    | ND  |
| cytochrome B561                                                               |        |   | 80   | ND  |
| cytochrome B6                                                                 |        |   | 3    | ND  |
| cytochrome C                                                                  |        |   | 1640 | 724 |
| cytochrome C assembly protein                                                 |        |   | 4    | ND  |
| cytochrome C biogenesis protein                                               |        |   | 131  | ND  |
| cytochrome c biogenesis protein (TlpA)                                        |        |   | 2    | ND  |
| cytochrome C biogenesis protein CcmA                                          |        |   | 9    | ND  |
| cytochrome C biogenesis protein CcmE                                          |        |   | 40   | ND  |
| cytochrome C biogenesis protein CcmF                                          |        |   | 11   | ND  |
| cytochrome C biogenesis protein CcmF, partial                                 |        |   | 6    | ND  |
| cytochrome C biogenesis protein CcmH                                          |        |   | 16   | ND  |
| cytochrome C biogenesis protein CcmI                                          |        |   | 1    | ND  |
| cytochrome C biogenesis protein CcsA                                          |        |   | 225  | 68  |
| cytochrome C biogenesis protein ResB                                          |        |   | 3    | ND  |
| cytochrome C biogenesis protein ResC                                          |        |   | 4    | ND  |
| cytochrome C biogenesis protein, partial                                      |        |   | 14   | ND  |
| cytochrome C biosynthesis protein                                             |        |   | 2    | ND  |
| cytochrome c class I                                                          |        |   | 4    | ND  |
| cytochrome C nitrate reductase                                                | NAR    | N | 5    | ND  |
| cytochrome C nitrite reductase                                                | ccNIR  | N | 4    | ND  |
| cytochrome C oxidase                                                          |        |   | 23   | ND  |
| cytochrome C oxidase assembly protein                                         |        |   | 18   | ND  |
| cytochrome C oxidase cbb3-type subunit III                                    |        |   | 2    | ND  |
| cytochrome C oxidase subunit I                                                |        |   | 18   | ND  |
| cytochrome c oxidase subunit II                                               |        |   | 3    | ND  |
| cytochrome C oxidase subunit III                                              |        |   | 18   | ND  |
| cytochrome C peroxidase                                                       |        |   | 35   | ND  |
| cytochrome C protein NapC                                                     | NAP    | N | 14   | ND  |
| cytochrome c subunit of flavocytochrome c sulfide dehydrogenase               | SuDH   | S | 17   | ND  |
| cytochrome c-type biogenesis protein CcmE                                     |        |   | 8    | ND  |
| cytochrome c-type biogenesis protein CcmF, partial                            |        |   | 3    | ND  |
| cytochrome C, partial                                                         |        |   | 9    | ND  |
| cytochrome C'                                                                 |        |   | 30   | 19  |
| cytochrome C4 precursor                                                       |        |   | 25   | 60  |

|                                                             |              |                             |     |    |
|-------------------------------------------------------------|--------------|-----------------------------|-----|----|
| cytochrome C550                                             |              |                             | 35  | ND |
| cytochrome C552                                             |              |                             | 64  | 19 |
| cytochrome C553                                             |              |                             | 118 | 47 |
| cytochrome Cbb3                                             |              |                             | 105 | ND |
| cytochrome cd1 nitrite reductase, partial                   |              |                             | 35  | 35 |
| cytochrome D ubiquinol oxidase subunit I                    | NIR          | N                           | 22  | ND |
| cytochrome oxidase                                          |              |                             | 21  | ND |
| cytochrome oxidase subunit I                                |              |                             | 8   | ND |
| cytochrome oxidase subunit II                               |              |                             | 3   | ND |
| cytochrome oxidase, partial                                 |              |                             | 1   | ND |
| cytosol aminopeptidase                                      |              |                             | 30  | 15 |
| D-alanine-D-alanine ligase                                  |              |                             | 25  | ND |
| D-alanyl-D-alanine carboxypeptidase                         |              |                             | 4   | ND |
| D-alanyl-D-alanine endopeptidase                            |              |                             | 2   | ND |
| D-fructose-6-phosphate amidotransferase                     |              |                             | 17  | ND |
| damage-inducible protein                                    |              |                             | 6   | ND |
| damage-inducible protein ClnA                               |              |                             | 2   | ND |
| deacetylase                                                 |              |                             | 17  | ND |
| DEAD/DEAH box helicase                                      |              |                             | 17  | ND |
| DEAD/DEAH box helicase, partial                             |              |                             | 9   | ND |
| decarboxylase                                               |              |                             | 10  | ND |
| dehydrogenase                                               |              |                             | 10  | ND |
| delta-aminolevulinic acid dehydratase                       |              |                             | 20  | 4  |
| denitrification system component NirT                       |              | N                           | 83  | ND |
| DeoR family transcriptional regulator                       |              |                             | 16  | ND |
| deoxycytidine triphosphate deaminase                        |              |                             | 12  | ND |
| deoxyguanosinetriphosphate triphosphohydrolase              |              |                             | 6   | ND |
| deoxyribonucleotide triphosphate pyrophosphatase            |              |                             | 2   | ND |
| deoxyuridine 5'-triphosphate nucleotidohydrolase            |              |                             | 13  | ND |
| desulfoferrodoxin                                           |              |                             | 12  | 11 |
| diacylglycerol kinase                                       |              |                             | 59  | ND |
| diacylglycerol transferase                                  |              |                             | 5   | ND |
| diadenosine tetraphosphatase                                |              |                             | 15  | ND |
| diaminopimelate decarboxylase                               |              |                             | 46  | 6  |
| diaminopimelate epimerase                                   |              |                             | 11  | ND |
| dienelactone hydrolase                                      | DH           | C (hydrocarbon degradation) | 2   | ND |
| diguanylate cyclase                                         |              |                             | 212 | ND |
| diguanylate cyclase, partial                                |              |                             | 5   | ND |
| diguanylate phosphodiesterase                               |              |                             | 22  | ND |
| dihydrodipicolinate reductase                               |              |                             | 7   | ND |
| dihydrodipicolinate synthase                                |              |                             | 14  | 53 |
| dihydrofolate reductase                                     |              |                             | 1   | ND |
| dihydroliipoamide acetyltransferase                         |              |                             | 4   | ND |
| dihydroliipoamide acetyltransferase, partial                |              |                             | 31  | ND |
| dihydroliipoamide dehydrogenase                             |              |                             | 47  | 80 |
| dihydroliipoamide dehydrogenase, partial                    |              |                             | 19  | 5  |
| dihydroliipoamide succinyltransferase, partial              |              |                             | 13  | ND |
| dihydroorotase                                              |              |                             | 26  | 4  |
| dihydroorotate dehydrogenase                                |              |                             | 2   | ND |
| dihydropteridine reductase                                  |              |                             | 3   | ND |
| dihydropterolate synthase                                   |              |                             | 19  | ND |
| dihydropyrimidine dehydrogenase subunit A                   |              |                             | 33  | ND |
| dihydroxy-acid dehydratase                                  |              |                             | 33  | ND |
| dihydroxy-acid dehydratase, partial                         |              |                             | 5   | ND |
| dihydroxynaphthoic acid synthetase                          |              |                             | 3   | ND |
| dimethylallyl adenosine tRNA methyltransferase              |              |                             | 3   | ND |
| dinitrogenase iron-molybdenum cofactor biosynthesis protein |              | N                           | 8   | ND |
| dioxygenase                                                 |              |                             | 4   | ND |
| dissimilatory membrane-bound nitrate reductase, partial     | NRZ          | N                           | 6   | ND |
| dissimilatory nitrite reductase, partial                    | NIR          | N                           | 17  | 30 |
| dissimilatory sulfite reductase                             | DSR          | S                           | 6   | 3  |
| dissimilatory sulfite reductase alpha subunit               | DSR          | S                           | 26  | 70 |
| dissimilatory sulfite reductase alpha subunit, partial      | DSR          | S                           | 1   | ND |
| dissimilatory sulfite reductase beta subunit                | DSR          | S                           | 18  | 10 |
| dissimilatory sulfite reductase beta subunit, partial       | DSR          | S                           | 8   | ND |
| disulfide bond formation protein                            |              |                             | 5   | ND |
| disulfide isomerase                                         | assimilation | S                           | 25  | ND |
| disulfide reductase                                         | assimilation | S                           | 10  | ND |
| DMSO reductase                                              |              | S                           | 11  | ND |
| DNA gyrase subunit A                                        |              |                             | 44  | ND |
| DNA gyrase subunit A, partial                               |              |                             | 5   | ND |
| DNA gyrase subunit B                                        |              |                             | 16  | 5  |
| DNA helicase                                                |              |                             | 13  | ND |
| DNA invertase                                               |              |                             | 2   | ND |
| DNA methylase                                               |              |                             | 19  | ND |
| DNA methylase, partial                                      |              |                             | 5   | ND |
| DNA methyltransferase                                       |              |                             | 21  | ND |
| DNA mismatch repair protein MutS                            |              |                             | 4   | ND |
| DNA polymerase                                              |              |                             | 10  | ND |
| DNA polymerase I                                            |              |                             | 9   | ND |
| DNA polymerase III                                          |              |                             | 23  | ND |
| DNA polymerase III subunit alpha                            |              |                             | 4   | ND |
| DNA polymerase III subunit beta                             |              |                             | 49  | 55 |
| DNA polymerase III subunit chi                              |              |                             | 6   | ND |
| DNA polymerase III subunit delta                            |              |                             | 3   | ND |
| DNA polymerase III subunit epsilon                          |              |                             | 7   | ND |
| DNA polymerase III subunit gamma/tau                        |              |                             | 191 | ND |
| DNA polymerase III subunit gamma/tau, partial               |              |                             | 86  | ND |
| DNA polymerase IV                                           |              |                             | 3   | ND |
| DNA polymerase V                                            |              |                             | 5   | ND |
| DNA polymerase, partial                                     |              |                             | 5   | ND |
| DNA primase                                                 |              |                             | 12  | ND |
| DNA processing protein DprA                                 |              |                             | 16  | ND |
| DNA protecting protein DprA                                 |              |                             | 2   | ND |
| DNA recombination protein RmuC                              |              |                             | 2   | ND |
| DNA repair protein                                          |              |                             | 19  | ND |
| DNA repair protein HhH-GPD                                  |              |                             | 18  | ND |
| DNA repair protein RadA                                     |              |                             | 9   | ND |
| DNA repair protein RadC                                     |              |                             | 20  | ND |
| DNA repair protein RecN                                     |              |                             | 1   | ND |
| DNA repair protein RecO                                     |              |                             | 3   | ND |
| DNA repair protein, partial                                 |              |                             | 48  | ND |
| DNA topoisomerase I                                         |              |                             | 5   | ND |

|                                                                                      |     |                    |     |     |
|--------------------------------------------------------------------------------------|-----|--------------------|-----|-----|
| DNA topoisomerase III                                                                |     |                    | 6   | ND  |
| DNA topoisomerase IV subunit B                                                       |     |                    | 3   | ND  |
| DNA-3-methyladenine glycosylase                                                      |     |                    | 9   | ND  |
| DNA-binding domain protein                                                           |     |                    | 6   | ND  |
| DNA-binding protein                                                                  |     |                    | 358 | 43  |
| DNA-binding protein, partial                                                         |     |                    | 3   | ND  |
| DNA-deoxyinosine glycosylase                                                         |     |                    | 3   | ND  |
| DNA-dependent helicase                                                               |     |                    | 2   | 8   |
| DNA-directed RNA polymerase sigma-70 factor                                          |     |                    | 117 | ND  |
| DNA-directed RNA polymerase subunit alpha                                            |     |                    | 160 | 63  |
| DNA-directed RNA polymerase subunit alpha, DNA-directed RNA polymerase subunit alpha |     |                    | 19  | ND  |
| DNA-directed RNA polymerase subunit beta                                             |     |                    | 187 | 9   |
| DNA-directed RNA polymerase subunit beta'                                            |     |                    | 190 | 44  |
| DNA-directed RNA polymerase subunit beta', partial                                   |     |                    | 24  | 17  |
| DNA-directed RNA polymerase subunit omega                                            |     |                    | 15  | ND  |
| DNA-directed RNA polymerase, alpha subunit                                           |     |                    | 2   | ND  |
| DnaA initiator-associating protein DiaA                                              |     |                    | 3   | ND  |
| DnaK suppressor protein                                                              |     |                    | 1   | ND  |
| DnaK, partial                                                                        |     |                    | 9   | ND  |
| Dps family ferritin                                                                  |     |                    | 3   | ND  |
| DSBA oxidoreductase                                                                  |     |                    | 48  | 77  |
| DsrS                                                                                 | DSR | S                  | 2   | ND  |
| dTDP-4-dehydrothiamine 3,5-epimerase                                                 |     |                    | 8   | ND  |
| dTDP-4-dehydrothiamine reductase                                                     |     |                    | 16  | ND  |
| ECF family RNA polymerase sigma factor                                               |     |                    | 2   | ND  |
| EDD domain protein, DegV family                                                      |     |                    | 1   | ND  |
| Efflux transporter, RND family, MFP subunit, partial                                 |     |                    | 10  | ND  |
| electron transfer flavoprotein alpha/beta-subunit                                    |     |                    | 5   | ND  |
| electron transfer flavoprotein subunit alpha                                         |     |                    | 11  | ND  |
| electron transfer flavoprotein subunit beta                                          |     |                    | 29  | ND  |
| electron transfer flavoprotein subunit beta, partial                                 |     |                    | 9   | ND  |
| electron transfer flavoprotein-ubiquinone oxidoreductase                             |     |                    | 3   | ND  |
| electron transporter RnfA                                                            |     |                    | 6   | ND  |
| electron transporter RnfB                                                            |     |                    | 8   | ND  |
| electron transporter RnfB, partial                                                   |     |                    | 15  | ND  |
| electron transporter RnfC, partial                                                   |     |                    | 4   | ND  |
| electron transporter RxsE                                                            |     |                    | 7   | ND  |
| elongation factor 4                                                                  |     |                    | 17  | ND  |
| elongation factor G                                                                  |     |                    | 196 | 75  |
| elongation factor G, partial                                                         |     |                    | 33  | ND  |
| elongation factor GreAB                                                              |     |                    | 8   | ND  |
| elongation factor P                                                                  |     |                    | 16  | ND  |
| elongation factor Ts                                                                 |     |                    | 109 | ND  |
| elongation factor Tu                                                                 |     |                    | 363 | 673 |
| elongation factor Tu, partial                                                        |     |                    | 121 | 73  |
| endonuclease                                                                         |     |                    | 6   | ND  |
| endonuclease DDE                                                                     |     |                    | 19  | ND  |
| enolase                                                                              | ENO | C (EMP Glycolysis) | 32  | 21  |
| Enoyl-(Acyl carrier protein) reductase, partial                                      |     |                    | 9   | ND  |
| enoyl-ACP reductase                                                                  |     |                    | 30  | ND  |
| enoyl-CoA hydratase                                                                  | ECH | C (fermentation)   | 40  | ND  |
| entericidin                                                                          |     |                    | 15  | ND  |
| epimerase                                                                            |     |                    | 3   | ND  |
| epoxyqueuosine reductase                                                             |     |                    | 7   | ND  |
| EpsI family protein                                                                  |     |                    | 17  | ND  |
| erythromycin biosynthesis sensory transduction protein eryC1                         |     |                    | 2   | ND  |
| erythronolide synthase                                                               |     |                    | 4   | ND  |
| esterase                                                                             |     |                    | 2   | ND  |
| ethanolamine utilization protein EutJ                                                |     |                    | 88  | ND  |
| excinuclease ABC subunit A                                                           |     |                    | 43  | ND  |
| exodeoxyribonuclease                                                                 |     |                    | 2   | ND  |
| exodeoxyribonuclease III                                                             |     |                    | 8   | ND  |
| exodeoxyribonuclease V subunit beta                                                  |     |                    | 9   | ND  |
| exodeoxyribonuclease VII large subunit                                               |     |                    | 14  | ND  |
| exodeoxyribonuclease VII small subunit                                               |     |                    | 9   | ND  |
| exonuclease                                                                          |     |                    | 15  | ND  |
| exonuclease V subunit gamma                                                          |     |                    | 4   | ND  |
| exopolyphosphatase                                                                   |     |                    | 4   | ND  |
| exopolysaccharide biosynthesis polyprenyl glycosylphosphotransferase                 |     |                    | 26  | ND  |
| exopolysaccharide biosynthesis protein                                               |     |                    | 16  | ND  |
| exoribonuclease R                                                                    |     |                    | 18  | ND  |
| exoribonuclease R, partial                                                           |     |                    | 13  | ND  |
| exosortase A                                                                         |     |                    | 22  | ND  |
| exosortase B                                                                         |     |                    | 9   | ND  |
| export ABC transporter permease protein                                              |     |                    | 4   | ND  |
| extracellular solute-binding protein family I                                        |     |                    | 3   | ND  |
| F0F1 ATP synthase subunit A                                                          |     |                    | 9   | ND  |
| F0F1 ATP synthase subunit alpha                                                      |     |                    | 138 | 41  |
| F0F1 ATP synthase subunit beta                                                       |     |                    | 98  | 60  |
| F0F1 ATP synthase subunit delta                                                      |     |                    | 106 | 14  |
| F0F1 ATP synthase subunit epsilon                                                    |     |                    | 22  | ND  |
| F0F1 ATP synthase subunit gamma                                                      |     |                    | 69  | 18  |
| F0F1-ATPase subunit                                                                  |     |                    | 3   | ND  |
| F420-dependent oxidoreductase                                                        |     |                    | 1   | ND  |
| F420-nonreducing hydrogenase                                                         | MVH | C (CH4)            | 12  | 6   |
| FAD-binding protein                                                                  |     |                    | 14  | 5   |
| FAD-linked oxidase                                                                   |     |                    | 27  | ND  |
| Fe-S cluster assembly ATPase SufC                                                    |     |                    | 19  | ND  |
| Fe-S cluster assembly protein HesB                                                   |     |                    | 28  | ND  |
| Fe-S cluster assembly protein SufB                                                   |     |                    | 23  | ND  |
| Fe-S cluster assembly protein SufD                                                   |     |                    | 20  | ND  |
| Fe-S cluster assembly scaffold IscU                                                  |     |                    | 72  | ND  |
| Fe-S cluster assembly transcriptional regulator IscR                                 |     |                    | 166 | ND  |
| Fe-S cluster protein                                                                 |     |                    | 9   | ND  |
| Fe-S oxidoreductase                                                                  |     |                    | 229 | ND  |
| Fe-S-cluster-containing hydrogenase subunit                                          |     |                    | 32  | ND  |
| FecR domain-containing protein                                                       |     |                    | 8   | ND  |
| ferredoxin                                                                           |     |                    | 173 | 11  |
| ferredoxin reductase                                                                 |     |                    | 7   | ND  |
| ferredoxin-NADP reductase                                                            |     |                    | 3   | ND  |
| ferric reductase                                                                     |     |                    | 71  | ND  |
| ferritin                                                                             |     |                    | 474 | 188 |
| Ferritin Dps family protein                                                          |     |                    | 2   | ND  |

|                                                                 |      |                                                        |     |    |
|-----------------------------------------------------------------|------|--------------------------------------------------------|-----|----|
| Filamentation induced by cAMP protein Fic                       |      |                                                        | 7   | ND |
| filamentous hemagglutinin                                       |      |                                                        | 20  | ND |
| fimbrial protein                                                |      |                                                        | 62  | ND |
| Fis family transcriptional regulator                            |      |                                                        | 140 | ND |
| Fis family transcriptional regulator, partial                   |      |                                                        | 2   | ND |
| flagellar basal body P-ring biosynthesis protein FlgA           |      |                                                        | 1   | ND |
| flagellar basal body rod modification protein FlgD              |      |                                                        | 44  | ND |
| flagellar basal body rod protein FlgC                           |      |                                                        | 39  | ND |
| flagellar basal body rod protein FlgF                           |      |                                                        | 27  | ND |
| flagellar basal body rod protein FlgG                           |      |                                                        | 29  | ND |
| flagellar biosynthesis protein FlgB                             |      |                                                        | 34  | ND |
| flagellar biosynthesis protein FlgM                             |      |                                                        | 5   | ND |
| flagellar biosynthesis protein FlgN                             |      |                                                        | 19  | ND |
| flagellar biosynthesis protein FlhA                             |      |                                                        | 3   | ND |
| flagellar biosynthesis protein FlhB                             |      |                                                        | 3   | ND |
| flagellar biosynthesis protein FlhC                             |      |                                                        | 5   | ND |
| flagellar biosynthesis protein FlhO                             |      |                                                        | 8   | ND |
| flagellar biosynthesis protein Flp                              |      |                                                        | 6   | ND |
| flagellar biosynthesis protein FltQ                             |      |                                                        | 2   | ND |
| flagellar biosynthesis protein FltS                             |      |                                                        | 24  | 4  |
| flagellar biosynthesis regulator FlhF                           |      |                                                        | 13  | ND |
| flagellar biosynthesis sigma factor                             |      |                                                        | 2   | ND |
| flagellar brake protein                                         |      |                                                        | 2   | ND |
| flagellar export protein FljI                                   |      |                                                        | 4   | ND |
| flagellar hook protein                                          |      |                                                        | 96  | ND |
| flagellar hook protein FlgE                                     |      |                                                        | 168 | ND |
| flagellar hook protein FlgK                                     |      |                                                        | 71  | ND |
| flagellar hook-associated 2-like protein                        |      |                                                        | 3   | ND |
| flagellar hook-associated protein                               |      |                                                        | 27  | ND |
| flagellar hook-associated protein FlgL                          |      |                                                        | 3   | ND |
| flagellar hook-basal body protein FlhE                          |      |                                                        | 41  | ND |
| flagellar hook-length control protein                           |      |                                                        | 1   | ND |
| flagellar L-ring protein FlgH                                   |      |                                                        | 22  | ND |
| flagellar M-ring protein FlhF                                   |      |                                                        | 14  | ND |
| flagellar motor protein                                         |      |                                                        | 2   | ND |
| flagellar motor protein MotA                                    |      |                                                        | 71  | ND |
| flagellar motor protein MotB                                    |      |                                                        | 5   | ND |
| flagellar motor protein MotB, partial                           |      |                                                        | 5   | ND |
| flagellar motor protein MotD                                    |      |                                                        | 2   | ND |
| flagellar motor switch protein FltG                             |      |                                                        | 11  | 4  |
| flagellar motor switch protein FltM                             |      |                                                        | 11  | ND |
| flagellar motor switch protein FltN                             |      |                                                        | 25  | ND |
| flagellar P-ring protein                                        |      |                                                        | 8   | ND |
| flagellar P-ring protein FlgI                                   |      |                                                        | 20  | ND |
| flagellar protein                                               |      |                                                        | 5   | ND |
| flagellar protein FlaF                                          |      |                                                        | 2   | ND |
| flagellar protein FlaG                                          |      |                                                        | 28  | ND |
| flagellar transcriptional regulator FlhD                        |      |                                                        | 44  | ND |
| flagellin                                                       |      |                                                        | 120 | 3  |
| flagellin domain-containing protein                             |      |                                                        | 12  | ND |
| flagellin modification protein FlmA                             |      |                                                        | 2   | ND |
| flagellin, partial                                              |      |                                                        | 5   | ND |
| flavocytochrome C                                               |      |                                                        | 6   | ND |
| flavocytochrome C sulfide dehydrogenase                         | SuDH | S                                                      | 31  | 10 |
| flavoprotein subunit of flavocytochrome c sulfide dehydrogenase | SuDH | S                                                      | 2   | ND |
| FlgN family protein                                             |      |                                                        | 7   | ND |
| FltI flagellar protein                                          |      |                                                        | 20  | ND |
| Flp pilus assembly protein, ATPase CpaE                         |      |                                                        | 4   | ND |
| FndB family transcriptional regulator                           |      |                                                        | 13  | ND |
| FMN adenyltransferase                                           |      |                                                        | 9   | ND |
| FoF1 ATP synthase subunit I                                     |      |                                                        | 4   | ND |
| foldase                                                         |      |                                                        | 1   | ND |
| formamidopyrimidine-DNA glycosylase                             |      |                                                        | 6   | ND |
| formate dehydrogenase                                           | FDH  | C (WL) and C (fermentation)                            | 185 | 94 |
| formate dehydrogenase subunit gamma                             | FDH  | C (WL) and C (fermentation)                            | 2   | ND |
| Formate dehydrogenase-N subunit beta                            | FDH  | C (WL) and C (fermentation)                            | 32  | ND |
| formate transporter                                             |      | C (WL) and C (fermentation)                            | 2   | ND |
| formate--tetrahydrofolate ligase                                | FTFL | C (WL) and C (fermentation)                            | 12  | 8  |
| formylglycine-generating enzyme                                 |      |                                                        | 3   | ND |
| formyltetrahydrofolate deformylase                              |      |                                                        | 2   | ND |
| fructose 1,6-bisphosphatase                                     | FBP  | C (Calvin-Benson-Bassham cycle) and C (EMP Glycolysis) | 180 | 46 |
| fructose-bisphosphate aldolase                                  | FBA  | C (Calvin-Benson-Bassham cycle) and C (EMP Glycolysis) | 124 | 62 |
| fumarate hydratase                                              |      |                                                        | 14  | ND |
| fumarate reductase                                              | FRD  | C (rTCA)                                               | 26  | ND |
| Fur family transcriptional regulator                            |      |                                                        | 53  | ND |
| FusA, partial                                                   |      |                                                        | 2   | ND |
| GAF and PAS/PAC sensor-containing adenylate/guanylate cyclase   |      |                                                        | 2   | ND |
| GAF sensor signal transduction histidine kinase                 |      |                                                        | 11  | ND |
| galactose-1-phosphate uridylyltransferase                       |      |                                                        | 1   | ND |
| gamma-glutamyl kinase                                           |      |                                                        | 7   | ND |
| gamma-glutamyl phosphate reductase                              |      |                                                        | 12  | ND |
| gas vesicle protein                                             |      |                                                        | 71  | 40 |
| gas vesicle protein GypA                                        |      |                                                        | 7   | ND |
| GCN5 family acetyltransferase                                   |      |                                                        | 8   | ND |
| GCN5 family N-acetyltransferase                                 |      |                                                        | 12  | ND |
| GCN5-related N-acetyltransferase                                |      |                                                        | 3   | ND |
| GDP-L-fucose synthase                                           |      |                                                        | 3   | ND |
| GDP-mannose 4,6-dehydratase                                     |      |                                                        | 11  | ND |
| GDP-mannose-dependent alpha-mannosyltransferase                 |      |                                                        | 2   | ND |
| general secretion pathway protein GspD                          |      |                                                        | 5   | ND |
| general secretion pathway protein GspE                          |      |                                                        | 99  | ND |
| general secretion pathway protein GspG                          |      |                                                        | 33  | ND |
| general secretion pathway protein GspH                          |      |                                                        | 28  | ND |
| general secretion pathway protein K                             |      |                                                        | 3   | ND |
| general stress protein                                          |      |                                                        | 11  | 13 |
| geranylgeranyl reductase                                        |      |                                                        | 2   | ND |
| geranyltransferase                                              |      |                                                        | 4   | ND |
| GGDEF                                                           |      |                                                        | 6   | ND |
| glmZ(sRNA)-inactivating NTPase                                  |      |                                                        | 10  | ND |
| globin                                                          |      |                                                        | 11  | ND |
| glucokinase                                                     | GCK  | C (EMP Glycolysis)                                     | 1   | ND |
| glucosamine--fructose-6-phosphate aminotransferase              |      |                                                        | 21  | ND |
| glucosamine-6-phosphate deaminase                               |      |                                                        | 3   | ND |

|                                                                |       |                                                        |     |     |
|----------------------------------------------------------------|-------|--------------------------------------------------------|-----|-----|
| glucose dehydrogenase                                          |       |                                                        | 3   | ND  |
| glucose-1-phosphate adenyltransferase                          |       |                                                        | 82  | 3   |
| glucose-1-phosphate thymidyltransferase                        |       |                                                        | 3   | ND  |
| glucose-6-phosphate isomerase                                  | G6PI  | C (EMP Glycolysis)                                     | 67  | ND  |
| glutamate 2,3-aminomutase                                      |       |                                                        | 2   | ND  |
| glutamate dehydrogenase                                        |       |                                                        | 18  | 54  |
| glutamate dehydrogenase, partial                               |       |                                                        | 2   | ND  |
| glutamate racemase                                             |       |                                                        | 13  | ND  |
| glutamate synthase                                             |       |                                                        | 432 | 89  |
| glutamate synthase (NADPH) small subunit, partial              |       |                                                        | 4   | ND  |
| glutamate synthase large subunit                               |       |                                                        | 7   | 6   |
| glutamate synthase subunit beta                                |       |                                                        | 65  | ND  |
| glutamate-cysteine ligase                                      |       |                                                        | 10  | ND  |
| glutamate-pyruvate aminotransferase                            |       |                                                        | 2   | ND  |
| glutamate-1-semialdehyde aminotransferase                      |       |                                                        | 10  | ND  |
| glutamine amidotransferase                                     |       |                                                        | 4   | ND  |
| glutamine synthetase                                           |       |                                                        | 54  | 25  |
| glutamine-synthetase adenyltransferase                         |       |                                                        | 6   | ND  |
| glutamyl-tRNA synthetase                                       |       |                                                        | 24  | ND  |
| glutamyl-tRNA amidotransferase                                 |       |                                                        | 42  | 3   |
| glutamyl-tRNA reductase                                        |       |                                                        | 40  | ND  |
| glutamyl-tRNA synthetase                                       |       |                                                        | 7   | ND  |
| glutaredoxin                                                   |       |                                                        | 127 | 10  |
| glutathione ABC transporter ATP-binding protein                |       |                                                        | 4   | ND  |
| glutathione peroxidase                                         |       |                                                        | 2   | ND  |
| glyceraldehyde-3-phosphate dehydrogenase                       | GAPDH | C (Calvin-Benson-Bassham cycle) and C (EMP Glycolysis) | 203 | 139 |
| glycerol kinase                                                |       |                                                        | 2   | ND  |
| glycerol-3-phosphate ABC transporter ATP-binding protein       |       |                                                        | 7   | ND  |
| glycerol-3-phosphate ABC transporter permease                  |       |                                                        | 4   | ND  |
| glycerol-3-phosphate ABC transporter substrate-binding protein |       |                                                        | 6   | ND  |
| glycerol-3-phosphate acyltransferase                           |       |                                                        | 7   | ND  |
| glycerol-3-phosphate transporter permease                      |       |                                                        | 1   | ND  |
| glycerophosphodiester phosphodiesterase                        |       |                                                        | 2   | ND  |
| glycerophosphoryl diester phosphodiesterase                    |       |                                                        | 2   | ND  |
| glycine cleavage system protein H                              |       |                                                        | 7   | ND  |
| glycine cleavage system protein R                              |       |                                                        | 5   | ND  |
| glycine cleavage system protein T                              |       |                                                        | 10  | ND  |
| glycine dehydrogenase                                          |       |                                                        | 11  | ND  |
| glycine dehydrogenase subunit 2                                |       |                                                        | 1   | ND  |
| glycogen branching protein                                     |       |                                                        | 25  | ND  |
| glycogen debranching protein                                   |       |                                                        | 27  | ND  |
| glycogen phosphorylase                                         |       |                                                        | 11  | ND  |
| glycogen synthase                                              |       | C                                                      | 29  | ND  |
| glycolate oxidase                                              |       |                                                        | 30  | ND  |
| glycoprotease                                                  |       |                                                        | 3   | ND  |
| glycoprotein X                                                 |       |                                                        | 10  | 29  |
| glycoside hydrolase                                            |       | C                                                      | 52  | ND  |
| glycosyl hydrolase                                             |       |                                                        | 2   | ND  |
| glycosyl transferase                                           |       |                                                        | 73  | ND  |
| glycosyl transferase family 1                                  |       |                                                        | 33  | ND  |
| glycosyl transferase family 2                                  |       |                                                        | 35  | ND  |
| glycyl-tRNA synthetase                                         |       |                                                        | 2   | ND  |
| glycyl-tRNA synthetase subunit alpha                           |       |                                                        | 15  | ND  |
| glycyl-tRNA synthetase subunit beta                            |       |                                                        | 7   | ND  |
| glyoxylate carboligase                                         |       |                                                        | 126 | ND  |
| GMP synthase                                                   |       |                                                        | 8   | ND  |
| GNAT family acetyltransferase                                  |       |                                                        | 31  | ND  |
| GntR family transcriptional regulator                          |       |                                                        | 129 | 5   |
| granule-associated-like protein                                |       |                                                        | 78  | 21  |
| group 1 glycosyl transferase                                   |       |                                                        | 10  | ND  |
| group II intron reverse transcriptase/maturase                 |       |                                                        | 15  | ND  |
| GTP binding protein                                            |       |                                                        | 10  | ND  |
| GTP cyclohydrolase                                             |       |                                                        | 103 | ND  |
| GTP pyrophosphokinase                                          |       |                                                        | 20  | ND  |
| GTP-binding protein                                            |       |                                                        | 70  | ND  |
| GTP-binding protein Era                                        |       |                                                        | 2   | ND  |
| GTPase                                                         |       |                                                        | 35  | 10  |
| GTPase CgtA                                                    |       |                                                        | 11  | ND  |
| GTPase Era                                                     |       |                                                        | 4   | 9   |
| GTPase HflX                                                    |       |                                                        | 6   | ND  |
| guanosine-3',5'-bis(diphosphate) 3'-pyrophosphohydrolase       |       |                                                        | 24  | ND  |
| guanylate cyclase                                              |       |                                                        | 6   | ND  |
| guanylate kinase                                               |       |                                                        | 10  | ND  |
| GxxExxY protein                                                |       |                                                        | 2   | ND  |
| GYD domain superfamily                                         |       |                                                        | 3   | 28  |
| gyrase subunit A protein                                       |       |                                                        | 1   | ND  |
| haloacid dehalogenase                                          |       |                                                        | 36  | ND  |
| heat shock protein                                             |       |                                                        | 4   | ND  |
| heat-shock protein                                             |       |                                                        | 50  | ND  |
| heat-shock protein Hsp20                                       |       |                                                        | 307 | 12  |
| heat-shock protein Hsp70                                       |       |                                                        | 14  | ND  |
| heat-shock protein Hsp90                                       |       |                                                        | 9   | 18  |
| heat-shock protein HspX                                        |       |                                                        | 55  | ND  |
| heavy metal efflux pump, CzcA family                           |       |                                                        | 1   | ND  |
| heavy metal transporter                                        |       |                                                        | 2   | ND  |
| helicase                                                       |       |                                                        | 10  | ND  |
| helicase UvrD                                                  |       |                                                        | 3   | ND  |
| helicase, C-terminal                                           |       |                                                        | 3   | ND  |
| hemagglutination activity protein                              |       |                                                        | 33  | ND  |
| hemagglutinin                                                  |       |                                                        | 4   | ND  |
| hemagglutinin-like secreted protein                            |       |                                                        | 4   | ND  |
| hemagglutinin, partial                                         |       |                                                        | 5   | ND  |
| heme ABC transporter ATP-binding protein                       |       |                                                        | 1   | ND  |
| heme ABC transporter permease                                  |       |                                                        | 68  | ND  |
| heme biosynthesis protein HemY                                 |       |                                                        | 1   | ND  |
| heme d1 biosynthesis radical SAM protein NirJ                  |       |                                                        | 3   | ND  |
| heme lyase subunit CcmF                                        |       |                                                        | 25  | ND  |
| heme transporter CcmC                                          |       |                                                        | 3   | ND  |
| hemerythrin                                                    |       |                                                        | 76  | 6   |
| Hemerythrin HHE cation binding domain protein                  |       |                                                        | 11  | ND  |
| hemin receptor                                                 |       |                                                        | 38  | ND  |
| hemin transporter                                              |       |                                                        | 2   | ND  |
| hemin-binding protein                                          |       |                                                        | 4   | ND  |

|                                                      |     |  |                                                  |       |      |
|------------------------------------------------------|-----|--|--------------------------------------------------|-------|------|
| hemolysin                                            |     |  |                                                  | 35    | ND   |
| hemolysin activation/secretion protein               |     |  |                                                  | 13    | ND   |
| hemolysin D                                          |     |  |                                                  | 7     | ND   |
| hemolysin secretion protein D                        |     |  |                                                  | 85    | ND   |
| hemolysin-type calcium-binding protein               |     |  |                                                  | 27    | ND   |
| hemolysin-type calcium-binding region                |     |  |                                                  | 25    | ND   |
| hemolysin-type calcium-binding repeat family protein |     |  |                                                  | 8     | ND   |
| hemolysin, partial                                   |     |  |                                                  | 21    | ND   |
| heptaprenyl diphosphate synthase                     |     |  |                                                  | 2     | ND   |
| heptose 1-phosphate adenylyltransferase, partial     |     |  |                                                  | 3     | ND   |
| heptosyltransferase                                  |     |  |                                                  | 4     | ND   |
| heterodisulfide reductase                            | HDR |  | S                                                | 310   | 66   |
| heterodisulfide reductase subunit A                  | HDR |  | S                                                | 172   | 29   |
| Hfk protein                                          |     |  |                                                  | 9     | 6    |
| histidine kinase                                     |     |  |                                                  | 1     | ND   |
| histidine kinase                                     |     |  |                                                  | 336   | 16   |
| histidine kinase, partial                            |     |  |                                                  | 2     | ND   |
| histidinol dehydrogenase                             |     |  |                                                  | 15    | 6    |
| histidinol phosphate phosphatase                     |     |  |                                                  | 2     | ND   |
| histidinol-phosphate aminotransferase                |     |  |                                                  | 8     | ND   |
| histidyl-tRNA synthetase                             |     |  |                                                  | 10    | ND   |
| histone deacetylase                                  |     |  |                                                  | 1     | ND   |
| HNH endonuclease                                     |     |  |                                                  | 3     | ND   |
| HNH endonuclease, partial                            |     |  |                                                  | 34    | ND   |
| Holliday junction DNA helicase                       |     |  |                                                  | 2     | ND   |
| Holliday junction DNA helicase RuvB                  |     |  |                                                  | 3     | ND   |
| homing endonuclease                                  |     |  |                                                  | 10    | ND   |
| homocitrate synthase                                 |     |  |                                                  | 2     | ND   |
| homoserine dehydrogenase                             |     |  |                                                  | 10    | ND   |
| HPr kinase                                           |     |  |                                                  | 2     | ND   |
| HrcA family transcriptional regulator                |     |  |                                                  | 15    | ND   |
| hydrazine oxidase, partial                           | HZO |  | N                                                | 3     | ND   |
| hydrazine synthase BC subunit                        | HZS |  | N                                                | 2     | ND   |
| hydrazine synthase subunit A, partial                | HZS |  | N                                                | 3     | ND   |
| hydrogenase                                          |     |  |                                                  | 156   | 5    |
| hydrogenase 2 large subunit                          |     |  |                                                  | 138   | 12   |
| hydrogenase 2 maturation endopeptidase               |     |  |                                                  | 15    | ND   |
| hydrogenase 2 protein HybA                           |     |  |                                                  | 17    | ND   |
| hydrogenase 2 small subunit                          |     |  |                                                  | 106   | ND   |
| hydrogenase assembly protein HupF                    |     |  |                                                  | 17    | ND   |
| hydrogenase assembly protein HupC                    |     |  |                                                  | 1     | ND   |
| hydrogenase formation protein HupD                   |     |  |                                                  | 9     | ND   |
| hydrogenase nickel incorporation protein HypA        |     |  |                                                  | 5     | ND   |
| hydrogenase nickel incorporation protein HypB        |     |  |                                                  | 20    | ND   |
| hydrolase                                            |     |  |                                                  | 6     | ND   |
| hydrolase, partial                                   |     |  |                                                  | 6     | ND   |
| hydroperoxidase                                      |     |  |                                                  | 544   | 16   |
| hydroxylamine oxidase                                | HAO |  | N                                                | 3     | ND   |
| hydroxylamine oxidoreductase                         | HAO |  | N                                                | 2     | ND   |
| hydroxylamine oxidoreductase (hao)                   | HAO |  | N                                                | 2     | ND   |
| hydroxylamine reductase                              | HCP |  | N                                                | 146   | 43   |
| hydroxymethylglutaryl-CoA lyase                      |     |  |                                                  | 6     | ND   |
| hydroxypyruvate isomerase                            |     |  |                                                  | 49    | ND   |
| hydroxypyruvate reductase                            | HPR |  | C (formaldehyde assimilation via serine pathway) | 10    | ND   |
| HypD, partial                                        |     |  |                                                  | 7     | ND   |
| hypothetical protein                                 |     |  |                                                  | 23213 | 1550 |
| hypothetical protein AB201_02875                     |     |  |                                                  | 37    | ND   |
| hypothetical protein Abin_001_002                    |     |  |                                                  | 17    | ND   |
| hypothetical protein ACD_10C00158G0001, partial      |     |  |                                                  | 5     | ND   |
| hypothetical protein ACD_23C00977G0001, partial      |     |  |                                                  | 11    | ND   |
| hypothetical protein ACD_34C00250G0004               |     |  |                                                  | 3     | ND   |
| hypothetical protein ACD_34C00250G0005               |     |  |                                                  | 24    | ND   |
| hypothetical protein ACD_34C00252G0001               |     |  |                                                  | 12    | ND   |
| hypothetical protein ACD_34C00252G0002               |     |  |                                                  | 26    | ND   |
| hypothetical protein ACD_34C00252G0003               |     |  |                                                  | 11    | ND   |
| hypothetical protein ACD_34C00252G0006               |     |  |                                                  | 4     | ND   |
| hypothetical protein ACD_34C00451G0001               |     |  |                                                  | 2     | ND   |
| hypothetical protein ACD_35C00107G0002               |     |  |                                                  | 12    | ND   |
| hypothetical protein ACD_58C00113G0001, partial      |     |  |                                                  | 1     | ND   |
| hypothetical protein ACD_75C00728G0001               |     |  |                                                  | 5     | ND   |
| hypothetical protein ACD_7C00143G0009                |     |  |                                                  | 3     | ND   |
| hypothetical protein ACD_81C00068G0001               |     |  |                                                  | 27    | ND   |
| hypothetical protein ACG97_12720                     |     |  |                                                  | 4     | ND   |
| hypothetical protein ADZ37_23465                     |     |  |                                                  | 2     | ND   |
| hypothetical protein ANME2D_01148                    |     |  |                                                  | 3     | ND   |
| hypothetical protein ANT_07950                       |     |  |                                                  | 7     | ND   |
| hypothetical protein ANT_16400                       |     |  |                                                  | 1     | ND   |
| hypothetical protein ARMA_0921                       |     |  |                                                  | 50    | ND   |
| hypothetical protein ARMA_1767                       |     |  |                                                  | 7     | ND   |
| hypothetical protein ARMA_1862                       |     |  |                                                  | 1     | ND   |
| hypothetical protein AW08_03878                      |     |  |                                                  | 16    | ND   |
| hypothetical protein AW09_004109                     |     |  |                                                  | 3     | ND   |
| hypothetical protein AZKH_p0111                      |     |  |                                                  | 4     | ND   |
| hypothetical protein BGP_3837                        |     |  |                                                  | 3     | ND   |
| hypothetical protein BSM_07040                       |     |  |                                                  | 364   | ND   |
| hypothetical protein BurJ1DRAFT_0671                 |     |  |                                                  | 10    | ND   |
| hypothetical protein BVRB_5g113470                   |     |  |                                                  | 7     | ND   |
| hypothetical protein CKO_00099                       |     |  |                                                  | 657   | ND   |
| hypothetical protein CLDAP_00920                     |     |  |                                                  | 1     | ND   |
| hypothetical protein CLDAP_09320                     |     |  |                                                  | 7     | ND   |
| hypothetical protein CLDAP_20270                     |     |  |                                                  | 48    | ND   |
| hypothetical protein Csp_H39680                      |     |  |                                                  | 38    | 3    |
| hypothetical protein DAPPUDRAFT_69133                |     |  |                                                  | 35    | ND   |
| hypothetical protein Daud_0898                       |     |  |                                                  | 5     | ND   |
| hypothetical protein DM80_6087                       |     |  |                                                  | 83    | ND   |
| hypothetical protein DSC_08620                       |     |  |                                                  | 1     | ND   |
| hypothetical protein ED21_17662                      |     |  |                                                  | 3     | ND   |
| hypothetical protein EMIHUDDRAFT_226110              |     |  |                                                  | 5     | ND   |
| hypothetical protein ETSY1_22400                     |     |  |                                                  | 3     | ND   |
| hypothetical protein ETSY2_38865                     |     |  |                                                  | 3     | ND   |
| hypothetical protein HMPREF1487_09102                |     |  |                                                  | 3     | ND   |
| hypothetical protein HMPREF9489_1547                 |     |  |                                                  | 94    | ND   |
| Hypothetical protein IALB_0759                       |     |  |                                                  | 20    | 17   |

|                                                |      |          |      |     |
|------------------------------------------------|------|----------|------|-----|
| Hypothetical protein IALB_1360                 |      |          | 1    | ND  |
| Hypothetical protein IALB_3145                 |      |          | 1    | 24  |
| hypothetical protein JCM15548_14680            |      |          | 2    | ND  |
| hypothetical protein JV46_08600                |      |          | 6    | ND  |
| hypothetical protein KB13_443                  |      |          | 159  | ND  |
| hypothetical protein kuste3403                 |      |          | 7    | ND  |
| hypothetical protein LARV_01055                |      |          | 16   | ND  |
| hypothetical protein LARV_01557                |      |          | 1    | ND  |
| hypothetical protein LARV_01814                |      |          | 2    | ND  |
| hypothetical protein LARV_02768                |      |          | 1    | ND  |
| hypothetical protein LARV_03126                |      |          | 2    | ND  |
| hypothetical protein LARV_03272                |      |          | 4    | ND  |
| hypothetical protein LARV_03275                |      |          | 13   | ND  |
| hypothetical protein LTAR_00263                |      |          | 1    | ND  |
| hypothetical protein MC7420_7908               |      |          | 4    | ND  |
| hypothetical protein MCHI_001973               |      |          | 3    | ND  |
| hypothetical protein MidDRAFT_2089             |      |          | 3    | ND  |
| hypothetical protein MidDRAFT_5036             |      |          | 2    | ND  |
| hypothetical protein MROS_1991                 |      |          | 12   | ND  |
| hypothetical protein N825_23335                |      |          | 3    | ND  |
| hypothetical protein NHU_03312                 |      |          | 2    | ND  |
| hypothetical protein PG1C_04765                |      |          | 4    | ND  |
| hypothetical protein PG1C_10985                |      |          | 3    | ND  |
| hypothetical protein PG1C_11965                |      |          | 3    | ND  |
| hypothetical protein PG1C_12875                |      |          | 29   | ND  |
| hypothetical protein PG1C_13060                |      |          | 6    | 27  |
| hypothetical protein Q619_VDC0001G0001         |      |          | 45   | ND  |
| hypothetical protein QOE_0008                  |      |          | 17   | ND  |
| hypothetical protein RZ63_08280                |      |          | 561  | ND  |
| hypothetical protein SCD_n00042                |      |          | 8    | ND  |
| hypothetical protein SCD_n00904                |      |          | 8    | ND  |
| hypothetical protein SCD_n00905                |      |          | 4    | ND  |
| hypothetical protein SCD_n00906                |      |          | 5    | ND  |
| hypothetical protein SCD_n02115                |      |          | 5    | ND  |
| hypothetical protein SCD_n02278                |      |          | 3    | ND  |
| hypothetical protein SCT_0047                  |      |          | 3    | ND  |
| hypothetical protein SCT_2339                  |      |          | 3    | ND  |
| hypothetical protein SCT_2870                  |      |          | 4    | ND  |
| hypothetical protein SK61_00679                |      |          | 978  | ND  |
| hypothetical protein SL003B_3023               |      |          | 5    | ND  |
| hypothetical protein SOVF_212770_partial       |      |          | 13   | ND  |
| hypothetical protein SUTH_00609                |      |          | 4    | ND  |
| hypothetical protein SUTH_00753                |      |          | 26   | ND  |
| hypothetical protein SUTH_01125                |      |          | 2    | ND  |
| hypothetical protein SUTH_01517                |      |          | 4    | ND  |
| hypothetical protein SUTH_01908                |      |          | 2    | ND  |
| hypothetical protein SUTH_01952                |      |          | 11   | ND  |
| hypothetical protein SUTH_01953                |      |          | 7    | ND  |
| hypothetical protein SUTH_01960                |      |          | 16   | ND  |
| hypothetical protein SUTH_02494                |      |          | 21   | ND  |
| hypothetical protein SUTH_02762                |      |          | 6    | ND  |
| hypothetical protein SUTH_03096                |      |          | 9    | ND  |
| hypothetical protein SUTH_03595                |      |          | 13   | ND  |
| hypothetical protein THICB2_410075             |      |          | 31   | ND  |
| hypothetical protein UBAL3_80150049            |      |          | 1    | 5   |
| hypothetical protein UR46_C0020G0002           |      |          | 2    | ND  |
| hypothetical protein US11_C0004G0071           |      |          | 3    | ND  |
| hypothetical protein US39_C0001G0164           |      |          | 27   | ND  |
| hypothetical protein UT10_C0031G0005           |      |          | 6    | 21  |
| hypothetical protein UT18_C0004G0019           |      |          | 3    | ND  |
| hypothetical protein UT23_C0012G0061           |      |          | 5    | ND  |
| hypothetical protein UT84_C0003G0011           |      |          | 3    | ND  |
| hypothetical protein UU74_C0052G0002           |      |          | 21   | ND  |
| hypothetical protein UU85_C0007G0026           |      |          | 1    | ND  |
| hypothetical protein UV40_C0039G0002           |      |          | 2    | ND  |
| hypothetical protein UY95_C0003G0009           |      |          | 15   | ND  |
| hypothetical protein ws034A6_0031              |      |          | 2    | ND  |
| hypothetical protein, partial                  |      |          | 1386 | 100 |
| hypothetical secreted protein                  |      |          | 36   | ND  |
| hypoxanthine-guanine phosphoribosyltransferase |      |          | 24   | ND  |
| IcIR family transcriptional regulator          |      |          | 5    | ND  |
| Ig-like domain-containing protein, partial     |      |          | 9    | ND  |
| imidazole glycerol phosphate synthase          |      |          | 89   | ND  |
| imidazoleglycerol-phosphate dehydratase        |      |          | 25   | 5   |
| IMP dehydrogenase                              |      |          | 4    | ND  |
| indolepyruvate ferredoxin oxidoreductase       |      |          | 32   | ND  |
| Inner membrane protein alx                     |      |          | 2    | ND  |
| inner-membrane translocator                    |      |          | 4    | ND  |
| inorganic polyphosphate/ATP-NAD kinase         |      |          | 1    | ND  |
| inorganic pyrophosphatase                      |      |          | 3    | ND  |
| inosine-5-monophosphate dehydrogenase          |      |          | 53   | 4   |
| inositol-3-phosphate synthase                  |      |          | 2    | ND  |
| insertase                                      |      |          | 25   | ND  |
| integrase                                      |      |          | 79   | ND  |
| integrase core domain protein                  |      |          | 4    | ND  |
| integrase, catalytic region                    |      |          | 3    | ND  |
| integrase, partial                             |      |          | 9    | ND  |
| integration host factor subunit alpha          |      |          | 15   | 19  |
| integration host factor subunit beta           |      |          | 32   | ND  |
| ion transporter                                |      |          | 3    | ND  |
| iron ABC transporter ATP-binding protein       |      |          | 17   | ND  |
| iron ABC transporter permease                  |      |          | 23   | ND  |
| iron ABC transporter substrate-binding protein |      |          | 3    | ND  |
| iron deficiency-induced protein A              |      |          | 192  | 7   |
| iron hydrogenase                               |      |          | 1    | 10  |
| iron transporter                               |      |          | 7    | 26  |
| iron-sulfur cluster insertion protein EtpA     |      |          | 67   | ND  |
| isochorismatase                                |      |          | 10   | ND  |
| isochorismatase hydrolase                      |      |          | 3    | ND  |
| isocitrate dehydrogenase                       | ICDH | C (rTCA) | 57   | 34  |
| isocitrate lyase                               |      |          | 98   | 5   |
| isoleucyl-tRNA synthetase                      |      |          | 15   | ND  |
| isoleucyl-tRNA synthetase, partial             |      |          | 5    | ND  |



|                                                           |      |                  |      |     |
|-----------------------------------------------------------|------|------------------|------|-----|
| isopropylmalate isomerase                                 |      |                  | 33   | ND  |
| isovaleryl-CoA dehydrogenase                              |      |                  | 4    | ND  |
| K(+)-insensitive pyrophosphate-energized proton pump      |      |                  | 1    | ND  |
| Kef-type K+ transport systems, membrane components        |      |                  | 3    | ND  |
| ketol-acid reductoisomerase                               |      |                  | 57   | 12  |
| ketose-bisphosphate aldolase                              |      |                  | 2    | ND  |
| L-aspartate oxidase                                       |      |                  | 21   | ND  |
| laccase                                                   |      |                  | 4    | ND  |
| Lacl family transcriptional regulator                     |      |                  | 1    | ND  |
| lactamase                                                 |      |                  | 48   | ND  |
| LAGLIDADG homing endonuclease                             |      |                  | 2    | ND  |
| Large exoprotein                                          |      |                  | 31   | ND  |
| leucine ABC transporter substrate-binding protein         |      |                  | 3    | ND  |
| leucine/isoleucine/valine transporter ATP-binding subunit |      |                  | 8    | ND  |
| leucyl-tRNA synthetase                                    |      |                  | 68   | 4   |
| leucyl/phenylalanyl-tRNA--protein transferase             |      |                  | 3    | ND  |
| LexA family transcriptional regulator                     |      |                  | 3    | ND  |
| ligand-gated channel                                      |      |                  | 11   | ND  |
| lipid A biosynthesis acyltransferase                      |      |                  | 2    | ND  |
| lipid transporter ATP-binding/permease                    |      |                  | 1    | ND  |
| lipocalin                                                 |      |                  | 3    | ND  |
| lipoprotein                                               |      |                  | 44   | ND  |
| lipoprotein ABC transporter ATP-binding protein           |      |                  | 2    | ND  |
| long-chain fatty acid ABC transporter                     |      |                  | 10   | ND  |
| long-chain fatty acid transporter                         |      |                  | 6    | 21  |
| long-chain fatty acid--CoA ligase                         |      |                  | 55   | ND  |
| long-chain fatty acid--CoA ligase, partial                |      |                  | 11   | 10  |
| long-chain-fatty-acid--CoA ligase, partial                |      |                  | 6    | ND  |
| LPS biosynthesis protein                                  |      |                  | 16   | ND  |
| LPS export ABC transporter ATP-binding protein            |      |                  | 3    | ND  |
| LPS export ABC transporter permease L.ptF                 |      |                  | 3    | ND  |
| LSU ribosomal protein L11P                                |      |                  | 1    | ND  |
| LSU ribosomal protein L17P                                |      |                  | 3    | ND  |
| LuxR family transcriptional regulator                     |      |                  | 62   | 5   |
| lysine 2,3-aminomutase                                    |      |                  | 1    | ND  |
| lysine decarboxylase                                      |      |                  | 4    | ND  |
| lysine methyltransferase                                  |      |                  | 1    | ND  |
| lysine transporter LysE                                   |      |                  | 6    | ND  |
| lysine--tRNA ligase                                       |      |                  | 3    | ND  |
| LysK family transcriptional regulator                     |      |                  | 84   | ND  |
| lysyl-tRNA synthetase                                     |      |                  | 4    | ND  |
| lytic transglycosylase                                    |      |                  | 36   | ND  |
| macrolide ABC transporter ATP-binding protein             |      |                  | 37   | ND  |
| magnesium and cobalt efflux protein CorC                  |      |                  | 6    | ND  |
| magnesium transporter                                     |      |                  | 12   | ND  |
| magnesium transporter MgtC                                |      |                  | 11   | ND  |
| magnetic particle membrane specific GTPase P16            |      |                  | 7    | ND  |
| major capsid protein                                      | MCP  |                  | 10   | 14  |
| major spike family protein, partial                       |      |                  | 2    | ND  |
| major spike protein, partial                              |      |                  | 4    | ND  |
| malate dehydrogenase                                      | MDH  | C (rTCA)         | 61   | 12  |
| malate synthase                                           |      |                  | 111  | ND  |
| malic enzyme                                              | ME   | C (fermentation) | 28   | 4   |
| malonyl CoA-ACP transacylase                              |      |                  | 12   | ND  |
| malonyl CoA-ACP transacylase, partial                     |      |                  | 1    | ND  |
| maltodextrin phosphorylase                                |      |                  | 3    | ND  |
| maltodextrin phosphorylase, partial                       |      |                  | 10   | ND  |
| multioligosyl trehalose synthase                          |      |                  | 2    | ND  |
| mammalian cell entry protein                              |      |                  | 5    | ND  |
| mandelate racemase                                        |      |                  | 3    | ND  |
| Manganese transport system membrane protein mntC          |      |                  | 1    | ND  |
| mannose-1-phosphate guanylyltransferase                   |      |                  | 31   | ND  |
| mannose-1-phosphate guanylyltransferase                   |      |                  | 25   | ND  |
| map, methionine aminopeptidase, methionyl aminopeptidase  |      |                  | 11   | ND  |
| MarR family transcriptional regulator                     |      |                  | 9    | ND  |
| MBL fold metallo-hydrolase                                |      |                  | 28   | ND  |
| mechanosensitive ion channel protein MscS                 |      |                  | 99   | ND  |
| membrane protease HIK                                     |      |                  | 6    | ND  |
| membrane protein                                          |      |                  | 1486 | 172 |
| membrane protein, partial                                 |      |                  | 9    | ND  |
| membrane-bound serine protease                            |      |                  | 2    | ND  |
| menaquinol oxidoreductase                                 |      |                  | 9    | ND  |
| menaquinol-cytochrome C reductase                         |      |                  | 4    | ND  |
| MerR family transcriptional regulator                     |      |                  | 25   | ND  |
| metal ABC transporter ATPase                              |      |                  | 3    | ND  |
| metal ABC transporter permease                            |      |                  | 24   | ND  |
| metal dependent phosphohydrolase                          |      |                  | 6    | ND  |
| metal-binding protein                                     |      |                  | 23   | ND  |
| metallo-beta-lactamase                                    |      |                  | 6    | ND  |
| metalloendopeptidase                                      |      |                  | 2    | ND  |
| metallophosphatase                                        |      |                  | 2    | ND  |
| metallophosphoesterase                                    |      |                  | 10   | ND  |
| methane monooxygenase                                     | MMO  | C (C1)           | 49   | ND  |
| methane monooxygenase, partial                            | MMO  | C (C1)           | 18   | ND  |
| methylenetetrahydrofolate cyclohydrolase                  | MTCH | C (WL)           | 19   | 4   |
| methionine aminopeptidase                                 |      |                  | 38   | ND  |
| methionine gamma-lyase                                    |      |                  | 2    | ND  |
| methionine sulfoxide reductase                            |      |                  | 10   | ND  |
| methionine synthase                                       |      |                  | 33   | ND  |
| methionyl-tRNA formyltransferase                          |      |                  | 2    | ND  |
| methionyl-tRNA synthetase                                 |      |                  | 32   | 14  |
| methyl coenzyme M reductase 1 subunit alpha               | MCR  | C (CH4)          | 23   | 39  |
| methyl coenzyme M reductase subunit beta                  | MCR  | C (CH4)          | 48   | 19  |
| methyl coenzyme M reductase subunit gamma                 | MCR  | C (CH4)          | 17   | 16  |
| methyl-accepting chemotaxis protein                       |      |                  | 24   | ND  |
| methyl-accepting chemotaxis sensory transducer            |      |                  | 5    | ND  |
| methyl-coenzyme M reductase                               | MCR  | C (CH4)          | 106  | 73  |
| methylamine utilization protein MauG                      |      |                  | 1    | ND  |
| methylcrotonoyl-CoA carboxylase                           |      |                  | 6    | ND  |
| methylmalonate-semialdehyde dehydrogenase                 |      |                  | 3    | ND  |
| methylmalonyl-CoA carboxyltransferase                     |      | propionate       | 10   | ND  |
| methylmalonyl-CoA mutase                                  | MCM  | C (3-HP/4-HB)    | 24   | ND  |
| methylthioribose-1-phosphate isomerase                    |      |                  | 11   | ND  |

|                                                                                                       |    |        |     |     |
|-------------------------------------------------------------------------------------------------------|----|--------|-----|-----|
| methyltransferase                                                                                     | MT | C (WL) | 21  | ND  |
| methyltransferase type 11                                                                             | MT | C (WL) | 20  | ND  |
| MFS transporter                                                                                       |    |        | 105 | ND  |
| Mg-chelatase subunit ChlD                                                                             |    |        | 2   | ND  |
| Middle cell wall protein                                                                              |    |        | 9   | 6   |
| Minor spike protein, partial                                                                          |    |        | 5   | ND  |
| mitochondrial GTPase elongation factor Tu, partial                                                    |    |        | 7   | 2   |
| Mobile element protein                                                                                |    |        | 5   | ND  |
| ModE family transcriptional regulator                                                                 |    |        | 2   | ND  |
| molecular chaperone                                                                                   |    |        | 26  | ND  |
| molecular chaperone DnaJ                                                                              |    |        | 21  | ND  |
| molecular chaperone DnaK                                                                              |    |        | 176 | 83  |
| molecular chaperone GroEL                                                                             |    |        | 372 | 310 |
| molecular chaperone GroES                                                                             |    |        | 87  | 42  |
| molecular chaperone HscA                                                                              |    |        | 61  | 5   |
| molecular chaperone Hsp20                                                                             |    |        | 58  | ND  |
| molecular chaperone SurA                                                                              |    |        | 9   | ND  |
| molybdenum biosynthesis protein MoaD                                                                  |    |        | 2   | ND  |
| molybdenum cofactor biosynthesis protein MoaA                                                         |    |        | 37  | ND  |
| molybdenum cofactor biosynthesis protein MoaC                                                         |    |        | 4   | ND  |
| molybdenum cofactor biosynthesis protein MoaD                                                         |    |        | 7   | ND  |
| molybdenum cofactor biosynthesis protein MoeA                                                         |    |        | 1   | ND  |
| molybdopterin biosynthesis protein                                                                    |    |        | 4   | ND  |
| molybdopterin biosynthesis protein MoeB                                                               |    |        | 12  | ND  |
| molybdopterin dinucleotide-binding protein                                                            |    |        | 3   | ND  |
| molybdopterin molybdenumtransferase                                                                   |    |        | 2   | ND  |
| molybdopterin oxidoreductase                                                                          |    |        | 119 | ND  |
| molybdopterin-guanine dinucleotide biosynthesis protein B                                             |    |        | 10  | ND  |
| molybdopterin-guanine dinucleotide biosynthesis protein MobA                                          |    |        | 3   | ND  |
| monovalent cation/H+ antiporter subunit B                                                             |    |        | 10  | ND  |
| mRNA interferase MqsR                                                                                 |    |        | 8   | ND  |
| mrp protein                                                                                           |    |        | 4   | ND  |
| multi-sensor hybrid histidine kinase                                                                  |    |        | 20  | ND  |
| multidrug ABC transporter ATP-binding protein                                                         |    |        | 21  | ND  |
| multidrug ABC transporter substrate-binding protein                                                   |    |        | 13  | ND  |
| multidrug efflux RND transporter permease subunit                                                     |    |        | 15  | ND  |
| multidrug MFS transporter                                                                             |    |        | 2   | ND  |
| multidrug transporter                                                                                 |    |        | 4   | ND  |
| multidrug transporter AcrB                                                                            |    |        | 248 | ND  |
| multifunctional tRNA nucleotidyl transferase/2'3'-cyclic phosphodiesterase/2'nucleotidase/phosphatase |    |        | 2   | ND  |
| Multiple resistance and pH homeostasis protein G                                                      |    |        | 10  | ND  |
| murein transglycosylase                                                                               |    |        | 4   | ND  |
| N-(5'-phosphoribosyl)anthranilate isomerase                                                           |    |        | 12  | ND  |
| N-6 DNA methylase                                                                                     |    |        | 4   | ND  |
| N-acetyl-alpha-D-glucosaminyl L-malate synthase                                                       |    |        | 7   | ND  |
| n-acetyl-gamma-glutamyl-phosphate reductase                                                           |    |        | 52  | 11  |
| N-acetylglucosamine transferase                                                                       |    |        | 4   | ND  |
| N-acetylglucosamine-1-phosphate uridylyltransferase                                                   |    |        | 1   | ND  |
| N-acetylglucosaminylidiphospho-UDP N-acetyl-beta-D-mannosaminyltransferase                            |    |        | 14  | ND  |
| N-acetylglutamate synthase                                                                            |    |        | 29  | ND  |
| N-acetylglucosaminyl-L-alanine amidase                                                                |    |        | 21  | ND  |
| N-acyl-phosphatidylethanolamine-hydrolyzing phospholipase                                             |    |        | 36  | ND  |
| N-acylneuraminate-9-phosphate synthase                                                                |    |        | 6   | ND  |
| N-ethylmaleimide chlorohydrolase                                                                      |    |        | 1   | ND  |
| N(5)-methyl-tetrahydropterin-coenzyme M methyltransferase subunit C                                   |    |        | 9   | ND  |
| N(5)-methyl-tetrahydropterin-coenzyme M methyltransferase subunit H                                   |    |        | 9   | 11  |
| N5-carboxyaminoimidazole ribonucleotide mutase                                                        |    |        | 9   | ND  |
| N5- glutamine S-adenosyl-L-methionine-dependent methyltransferase                                     |    |        | 4   | ND  |
| Na+/Pi-cotransporter II-like protein                                                                  |    |        | 3   | ND  |
| Na+/proline symporter                                                                                 |    |        | 2   | ND  |
| Na+/solute symporter                                                                                  |    |        | 5   | ND  |
| NAD-dependent dehydratase                                                                             |    |        | 30  | ND  |
| NAD-dependent DNA ligase LigA                                                                         |    |        | 1   | ND  |
| NAD-dependent epimerase                                                                               |    |        | 2   | ND  |
| NAD(FAD)-utilizing dehydrogenase                                                                      |    |        | 2   | ND  |
| NAD(P) transhydrogenase subunit alpha                                                                 |    |        | 38  | ND  |
| NAD(P)H:quinone oxidoreductase                                                                        |    |        | 6   | ND  |
| NADH dehydrogenase                                                                                    |    |        | 280 | 36  |
| NADH dehydrogenase subunit B                                                                          |    |        | 25  | ND  |
| NADH dehydrogenase subunit C                                                                          |    |        | 3   | ND  |
| NADH dehydrogenase subunit D                                                                          |    |        | 36  | ND  |
| NADH dehydrogenase subunit E                                                                          |    |        | 31  | ND  |
| NADH dehydrogenase subunit G                                                                          |    |        | 108 | 6   |
| NADH dehydrogenase subunit I                                                                          |    |        | 7   | ND  |
| NADH dehydrogenase subunit J                                                                          |    |        | 4   | ND  |
| NADH dehydrogenase subunit K                                                                          |    |        | 2   | ND  |
| NADH dehydrogenase, partial                                                                           |    |        | 3   | ND  |
| NADH-plastoquinone oxidoreductase 49 kDa subunit                                                      |    |        | 1   | ND  |
| NADH-quinone oxidoreductase                                                                           |    |        | 4   | ND  |
| NADH-quinone oxidoreductase subunit B                                                                 |    |        | 2   | ND  |
| NADH-quinone oxidoreductase subunit H                                                                 |    |        | 23  | ND  |
| NADH-quinone oxidoreductase subunit K                                                                 |    |        | 17  | ND  |
| NADH-quinone oxidoreductase subunit L                                                                 |    |        | 2   | ND  |
| NADH-quinone oxidoreductase subunit N                                                                 |    |        | 2   | ND  |
| NADH-ubiquinone oxidoreductase                                                                        |    |        | 1   | ND  |
| NADH-ubiquinone oxidoreductase subunit 4L                                                             |    |        | 2   | ND  |
| NADH-ubiquinone oxidoreductase subunit 6                                                              |    |        | 6   | ND  |
| NADH:flavin oxidoreductase                                                                            |    |        | 5   | ND  |
| NADH:ubiquinone oxidoreductase 49 kD subunit 7                                                        |    |        | 3   | ND  |
| NADH:ubiquinone oxidoreductase subunit A                                                              |    |        | 14  | ND  |
| NADH:ubiquinone oxidoreductase subunit G iron-sulfur-binding                                          |    |        | 6   | ND  |
| NADH:ubiquinone oxidoreductase subunit H                                                              |    |        | 26  | ND  |
| NADH:ubiquinone oxidoreductase subunit J                                                              |    |        | 23  | ND  |
| NADH:ubiquinone oxidoreductase subunit L                                                              |    |        | 46  | 3   |
| NADH:ubiquinone oxidoreductase subunit M                                                              |    |        | 35  | ND  |
| NADH:ubiquinone oxidoreductase subunit N                                                              |    |        | 15  | ND  |
| NADP oxidoreductase                                                                                   |    |        | 36  | ND  |
| NADP transhydrogenase subunit alpha                                                                   |    |        | 5   | ND  |
| NADP-specific glutamate dehydrogenase                                                                 |    |        | 15  | 15  |
| NADPH-dependent FMN reductase                                                                         |    |        | 8   | ND  |
| Ni,Fe-hydrogenase I large subunit                                                                     |    |        | 2   | 27  |
| Ni/Fe hydrogenase                                                                                     |    |        | 8   | ND  |
| nickel-dependent hydrogenase b-type cytochrome subunit                                                |    |        | 3   | ND  |

|                                                                                 |      |   |  |     |      |
|---------------------------------------------------------------------------------|------|---|--|-----|------|
| nicotinate-nucleotide--dimethylbenzimidazole phosphoribosyltransferase, partial |      |   |  | 3   | ND   |
| Nif3-like dinuclear metal center hexameric protein                              |      | N |  | 16  | ND   |
| nifU protein                                                                    |      | N |  | 2   | ND   |
| NirS, partial                                                                   | NIR  | N |  | 4   | ND   |
| nitrate ABC transporter ATP-binding protein                                     |      | N |  | 1   | ND   |
| nitrate reductase                                                               | NRA  | N |  | 446 | 1992 |
| nitrate reductase A subunit alpha                                               | NRA  | N |  | 23  | 3    |
| nitrate reductase A subunit beta                                                | NRA  | N |  | 3   | ND   |
| nitrate reductase A subunit gamma                                               | NRA  | N |  | 5   | ND   |
| nitrate reductase catalytic subunit                                             | NRA  | N |  | 34  | 180  |
| nitrate reductase, partial                                                      | NRA  | N |  | 4   | ND   |
| nitric oxide reductase                                                          | NOR  | N |  | 200 | 3    |
| nitric oxide reductase activation protein                                       | NOR  | N |  | 2   | ND   |
| nitric oxide reductase subunit B                                                | NOR  | N |  | 9   | ND   |
| nitrite reductase (ammonia-forming)                                             | NirS | N |  | 28  | ND   |
| nitrite reductase                                                               | NIR  | N |  | 249 | 97   |
| nitrite reductase, partial                                                      | NIR  | N |  | 38  | 9    |
| nitrogen fixation protein                                                       |      | N |  | 4   | ND   |
| nitrogen fixation protein FixG                                                  |      | N |  | 9   | ND   |
| nitrogen fixation protein FixH                                                  |      | N |  | 18  | ND   |
| nitrogen fixation protein NifU                                                  |      | N |  | 8   | ND   |
| nitrogen regulation protein NR(I)                                               |      | N |  | 2   | ND   |
| nitrogen regulatory protein P-II                                                |      | N |  | 1   | ND   |
| nitrogen regulatory protein P-II 1                                              |      | N |  | 35  | 30   |
| nitrogen regulatory protein P-II family                                         |      | N |  | 1   | ND   |
| nitrogen utilization protein B                                                  |      | N |  | 4   | ND   |
| nitrogen-fixing protein NifU                                                    |      | N |  | 4   | ND   |
| nitroreductase                                                                  |      | N |  | 7   | ND   |
| nitrosative-stress tolerance protein NnrS                                       |      |   |  | 4   | ND   |
| nitrous oxide reductase accessory protein NosL                                  | NOS  | N |  | 65  | 19   |
| nitrous oxide reductase, partial                                                | NOS  | N |  | 23  | 44   |
| nitrous-oxide reductase                                                         | NOS  | N |  | 64  | 74   |
| NlpBDapX family lipoprotein                                                     |      |   |  | 7   | ND   |
| ntrs family protein                                                             |      |   |  | 1   | ND   |
| nonstructural polyprotein                                                       |      |   |  | 2   | ND   |
| NosZ, partial                                                                   | NOS  | N |  | 54  | 90   |
| NrdR family transcriptional regulator                                           |      |   |  | 20  | ND   |
| nucleoid-associated protein                                                     |      |   |  | 17  | ND   |
| nucleoside diphosphate kinase                                                   |      |   |  | 10  | ND   |
| nucleoside recognition domain-containing protein                                |      |   |  | 6   | ND   |
| nucleoside-diphosphate-sugar epimerase                                          |      |   |  | 2   | ND   |
| nucleoside-diphosphate-sugar pyrophosphorylase                                  |      |   |  | 3   | ND   |
| nucleoside-triphosphate diphosphatase                                           |      |   |  | 3   | ND   |
| nucleotide-binding protein                                                      |      |   |  | 15  | ND   |
| nucleotidyltransferase                                                          |      |   |  | 27  | ND   |
| NUDIX hydrolase                                                                 |      |   |  | 31  | ND   |
| NusA antitermination factor                                                     |      |   |  | 2   | ND   |
| O-acetylhomoserine aminocarboxypropyltransferase                                |      |   |  | 21  | 4    |
| O-succinylhomoserine sulfhydrylase                                              |      |   |  | 7   | 3    |
| octaprenyl diphosphate synthase                                                 |      |   |  | 14  | ND   |
| oligopeptidase A                                                                |      |   |  | 65  | 5    |
| oligoribonuclease                                                               |      |   |  | 19  | ND   |
| OmpA/MotB domain protein                                                        |      |   |  | 2   | ND   |
| organic solvent tolerance protein (OstA)                                        |      |   |  | 2   | ND   |
| ornithine acetyltransferase                                                     |      |   |  | 2   | ND   |
| ornithine carbamoyltransferase                                                  |      |   |  | 12  | ND   |
| ornithine decarboxylase                                                         |      |   |  | 1   | ND   |
| orotate phosphoribosyltransferase                                               |      |   |  | 22  | ND   |
| orotidine 5'-phosphate decarboxylase                                            |      |   |  | 21  | ND   |
| osmotically inducible protein C                                                 |      |   |  | 48  | ND   |
| osmotically inducible protein OsmC                                              |      |   |  | 3   | ND   |
| outer membrane adhesin like protein                                             |      |   |  | 4   | ND   |
| outer membrane adhesin-like protein                                             |      |   |  | 22  | ND   |
| outer membrane channel protein, partial                                         |      |   |  | 3   | ND   |
| outer membrane efflux protein                                                   |      |   |  | 32  | 20   |
| outer membrane lipid asymmetry maintenance protein MlaD                         |      |   |  | 82  | ND   |
| outer membrane lipoprotein                                                      |      |   |  | 10  | ND   |
| outer membrane protein                                                          |      |   |  | 5   | ND   |
| oxidase                                                                         |      |   |  | 3   | ND   |
| oxidoreductase                                                                  |      |   |  | 43  | 26   |
| PadR family transcriptional regulator                                           |      |   |  | 2   | ND   |
| ParB/RepB/SpoJ family partition protein                                         |      |   |  | 9   | 5    |
| Particulate Methane Oxygenase A                                                 | MMO  | C |  | 2   | ND   |
| parvulin-like peptidyl-prolyl isomerase, partial                                |      |   |  | 2   | ND   |
| PAS domain S-box                                                                |      |   |  | 3   | ND   |
| PAS/PAC sensor signal transduction histidine kinase                             |      |   |  | 1   | ND   |
| PAS/PAC sensor-containing diguanylate cyclase/phosphodiesterase                 |      |   |  | 4   | ND   |
| patatin                                                                         |      |   |  | 4   | ND   |
| PE-PGRS family protein                                                          |      |   |  | 15  | ND   |
| penicillin-binding protein                                                      |      |   |  | 17  | ND   |
| penicillin-binding protein 2                                                    |      |   |  | 1   | ND   |
| PEP-CTERM domain protein                                                        |      |   |  | 607 | 24   |
| PEP-CTERM domain protein, partial                                               |      |   |  | 10  | ND   |
| PEP-CTERM motif protein                                                         |      |   |  | 5   | ND   |
| peptidase                                                                       | PEP  | N |  | 98  | 11   |
| peptidase C39                                                                   | PEP  | N |  | 16  | ND   |
| peptidase M1                                                                    | PEP  | N |  | 68  | ND   |
| peptidase M16                                                                   | PEP  | N |  | 22  | ND   |
| peptidase M17                                                                   | PEP  | N |  | 13  | 8    |
| peptidase M20                                                                   | PEP  | N |  | 3   | ND   |
| peptidase M22                                                                   | PEP  | N |  | 11  | ND   |
| peptidase M23                                                                   | PEP  | N |  | 64  | ND   |
| peptidase M28                                                                   | PEP  | N |  | 4   | ND   |
| peptidase M48                                                                   | PEP  | N |  | 45  | ND   |
| peptidase M50                                                                   | PEP  | N |  | 5   | ND   |
| peptidase PMbA                                                                  | PEP  | N |  | 5   | ND   |
| peptidase S14                                                                   | PEP  | N |  | 31  | 3    |
| peptidase S16                                                                   | PEP  | N |  | 7   | ND   |
| peptidase S41                                                                   | PEP  | N |  | 169 | 9    |
| peptidase S46                                                                   | PEP  | N |  | 1   | ND   |
| peptidase S49                                                                   | PEP  | N |  | 33  | ND   |
| peptidase S8                                                                    | PEP  | N |  | 7   | ND   |
| peptidase U32                                                                   | PEP  | N |  | 9   | ND   |

|                                                                               |       |                                                        |     |     |
|-------------------------------------------------------------------------------|-------|--------------------------------------------------------|-----|-----|
| peptidase U35                                                                 | PEP   | N                                                      | 8   | ND  |
| peptidase, partial                                                            | PEP   | N                                                      | 13  | ND  |
| peptide ABC transporter ATP-binding protein                                   |       |                                                        | 3   | ND  |
| peptide ABC transporter ATPase                                                |       |                                                        | 8   | ND  |
| peptide ABC transporter permease                                              |       |                                                        | 13  | ND  |
| peptide ABC transporter substrate-binding protein                             |       |                                                        | 62  | 120 |
| peptide chain release factor 1                                                |       |                                                        | 20  | ND  |
| peptide chain release factor 2                                                |       |                                                        | 17  | ND  |
| peptide deformylase                                                           |       |                                                        | 15  | 3   |
| peptide transporter                                                           |       |                                                        | 4   | ND  |
| peptide-binding protein                                                       |       |                                                        | 4   | ND  |
| peptide/nickel ABC transporter substrate-binding protein                      |       |                                                        | 21  | 7   |
| peptide/nickel transport system substrate-binding protein                     |       |                                                        | 32  | 13  |
| peptidoglycan bridge formation protein FemAB                                  |       |                                                        | 2   | ND  |
| peptidoglycan glycosyltransferase                                             |       |                                                        | 5   | ND  |
| peptidoglycan transglycosylase                                                |       |                                                        | 3   | ND  |
| peptidoglycan-associated lipoprotein                                          |       |                                                        | 5   | ND  |
| peptidoglycan-binding protein                                                 |       |                                                        | 80  | 46  |
| peptidoglycan-binding protein LysM                                            |       |                                                        | 8   | ND  |
| peptidyl-prolyl cis-trans isomerase                                           |       |                                                        | 26  | 9   |
| peptidyl-tRNA hydrolase                                                       |       |                                                        | 5   | ND  |
| peptidylprolyl isomerase                                                      |       |                                                        | 35  | 3   |
| periplasmic nitrate reductase                                                 | NAP   | N                                                      | 1   | 33  |
| periplasmic or secreted lipoprotein                                           |       |                                                        | 3   | ND  |
| permease                                                                      |       |                                                        | 73  | ND  |
| peroxidase                                                                    |       |                                                        | 76  | ND  |
| peroxidase, partial                                                           |       |                                                        | 122 | ND  |
| peroxiredoxin                                                                 |       |                                                        | 204 | ND  |
| pH-dependent sodium/proton antiporter                                         |       |                                                        | 21  | ND  |
| phage shock protein                                                           |       |                                                        | 26  | ND  |
| phage-like protein                                                            | phage |                                                        | 10  | ND  |
| Phasin                                                                        |       |                                                        | 9   | ND  |
| phasin family protein                                                         |       |                                                        | 27  | 8   |
| phasin protein                                                                |       |                                                        | 113 | ND  |
| phenylacetate--CoA ligase                                                     |       |                                                        | 8   | ND  |
| phenylacetate-CoA ligase                                                      |       |                                                        | 16  | ND  |
| phenylalanyl-tRNA synthetase subunit alpha                                    |       |                                                        | 7   | ND  |
| phenylalanyl-tRNA synthetase subunit beta                                     |       |                                                        | 40  | ND  |
| Pho4p                                                                         |       |                                                        | 2   | ND  |
| PhoP family transcriptional regulator                                         |       |                                                        | 27  | ND  |
| phosphate                                                                     |       |                                                        | 61  | ND  |
| phosphate ABC transporter                                                     |       |                                                        | 3   | ND  |
| phosphate ABC transporter ATP-binding protein                                 |       |                                                        | 79  | 7   |
| phosphate ABC transporter permease                                            |       |                                                        | 170 | ND  |
| phosphate ABC transporter substrate-binding protein                           |       |                                                        | 246 | 32  |
| phosphate acetyltransferase                                                   |       |                                                        | 2   | ND  |
| phosphate acyltransferase                                                     |       |                                                        | 50  | ND  |
| phosphate import ATP-binding protein PstB                                     |       |                                                        | 19  | ND  |
| phosphate starvation protein PhoH                                             |       |                                                        | 65  | ND  |
| phosphate starvation-inducible protein PsiF                                   |       |                                                        | 52  | ND  |
| phosphate transporter permease subunit PstC                                   |       |                                                        | 29  | ND  |
| phosphate-binding protein                                                     |       |                                                        | 116 | 50  |
| phosphate/phosphate/phosphonate ABC transporters, periplasmic binding protein |       |                                                        | 20  | ND  |
| phosphatidate cytidyltransferase                                              |       |                                                        | 9   | ND  |
| phosphatidylethanolamine N-methyltransferase                                  |       |                                                        | 4   | ND  |
| phosphatidylserine decarboxylase                                              |       |                                                        | 20  | ND  |
| phospho-2-dehydro-3-deoxyheptonate aldolase                                   |       |                                                        | 27  | 4   |
| phospho-N-acetylmuramoyl-pentapeptide transferase                             |       |                                                        | 3   | ND  |
| phospho-N-acetylmuramoyl-pentapeptide-transferase                             |       |                                                        | 12  | ND  |
| phosphocarrier protein HPr                                                    |       |                                                        | 7   | ND  |
| phosphodiesterase                                                             |       |                                                        | 14  | ND  |
| phosphoenolpyruvate carboxykinase                                             | PCK   | C (Gluconeogenesis)                                    | 21  | ND  |
| phosphoenolpyruvate carboxylase                                               | PEPC  | C (formaldehyde assimilation via serine pathway)       | 5   | ND  |
| phosphoenolpyruvate synthase                                                  |       |                                                        | 22  | ND  |
| phosphoenolpyruvate-protein phosphotransferase                                |       |                                                        | 10  | ND  |
| phosphoesterase                                                               |       |                                                        | 38  | ND  |
| phosphoesterase PA-phosphatase                                                |       |                                                        | 5   | ND  |
| phosphofructokinase                                                           | PFK   | C (EMP Glycolysis)                                     | 1   | 2   |
| phosphoglucomutase                                                            |       |                                                        | 22  | ND  |
| phosphoglucosamine mutase                                                     |       |                                                        | 33  | ND  |
| phosphoglycerate kinase                                                       | PGK   | C (Calvin-Benson-Bassham cycle) and C (EMP Glycolysis) | 138 | 28  |
| phosphoglycerate mutase                                                       | PGM   | C (EMP Glycolysis)                                     | 2   | ND  |
| phosphoglyceromutase                                                          |       |                                                        | 19  | ND  |
| phosphoglycolate phosphatase                                                  |       |                                                        | 8   | ND  |
| phosphoheptose isomerase                                                      |       |                                                        | 52  | ND  |
| phosphohistidine phosphatase                                                  |       |                                                        | 23  | ND  |
| phosphohydrolase                                                              |       |                                                        | 113 | ND  |
| phospholipid-binding protein                                                  |       |                                                        | 21  | ND  |
| phosphomethylpyrimidine kinase                                                |       |                                                        | 13  | ND  |
| phosphonate ABC transporter                                                   |       |                                                        | 38  | ND  |
| phosphonate ABC transporter ATP-binding protein                               |       |                                                        | 136 | ND  |
| phosphonate ABC transporter permease                                          |       |                                                        | 115 | ND  |
| phosphonate ABC transporter substrate-binding protein                         |       |                                                        | 138 | 135 |
| phosphonate ABC transporter substrate-binding protein                         |       |                                                        | 2   | ND  |
| phosphonate C-P lyase                                                         |       |                                                        | 11  | ND  |
| phosphonate C-P lyase system protein PhnK                                     |       |                                                        | 77  | ND  |
| phosphonate metabolism protein                                                |       |                                                        | 1   | ND  |
| phosphonate metabolism protein PhnG                                           |       |                                                        | 15  | ND  |
| phosphonate metabolism protein PhnM                                           |       |                                                        | 149 | ND  |
| phosphonate/organophosphate ester transporter subunit                         |       |                                                        | 9   | ND  |
| phosphonoacetate hydrolase                                                    |       |                                                        | 14  | ND  |
| phosphopantetheine adenylyltransferase                                        |       |                                                        | 13  | 2   |
| phosphopantothenate synthase                                                  |       |                                                        | 68  | ND  |
| phosphoprotein phosphatase                                                    |       |                                                        | 3   | ND  |
| phosphoribosyl-AMP cyclohydrolase                                             |       |                                                        | 27  | ND  |
| phosphoribosyl-ATP pyrophosphatase                                            |       |                                                        | 11  | ND  |
| phosphoribosylamine--glycine ligase                                           |       |                                                        | 11  | ND  |
| phosphoribosylaminoimidazole carboxylase                                      |       |                                                        | 4   | ND  |
| phosphoribosylaminoimidazole synthetase                                       |       |                                                        | 11  | ND  |
| phosphoribosylaminoimidazole-succinocarboxamide synthase                      |       |                                                        | 45  | 5   |
| phosphoribosylaminoimidazolecarboxamide formyltransferase                     |       |                                                        | 9   | ND  |
| phosphoribosylformylglycinamide synthase                                      |       |                                                        | 43  | ND  |
| phosphoribosylglycinamide formyltransferase                                   |       |                                                        | 11  | ND  |

|                                                                     |     |                                 |     |     |
|---------------------------------------------------------------------|-----|---------------------------------|-----|-----|
| phosphoribulokinase                                                 | PRK | C (Calvin-Benson-Bassham cycle) | 62  | 8   |
| phosphoserine phosphatase                                           |     |                                 | 7   | ND  |
| photosystem reaction center subunit H                               |     |                                 | 1   | ND  |
| PhoU family transcriptional regulator                               |     |                                 | 50  | 77  |
| phytoene synthase                                                   |     |                                 | 6   | ND  |
| PII uridylyl-transferase                                            |     |                                 | 5   | ND  |
| pilin                                                               |     |                                 | 48  | ND  |
| pilus assembly protein                                              |     |                                 | 65  | ND  |
| pilus assembly protein CpaE                                         |     |                                 | 17  | ND  |
| pilus assembly protein CpaF                                         |     |                                 | 5   | ND  |
| pilus assembly protein PilM                                         |     |                                 | 101 | ND  |
| pilus assembly protein PilO                                         |     |                                 | 17  | 14  |
| pilus assembly protein PilP                                         |     |                                 | 25  | 7   |
| pilus assembly protein PilZ                                         |     |                                 | 26  | ND  |
| pilus assembly protein TadD                                         |     |                                 | 21  | ND  |
| pilus assembly protein TadG                                         |     |                                 | 17  | ND  |
| pirin                                                               |     |                                 | 10  | ND  |
| plasmid maintenance system killer protein                           |     |                                 | 22  | ND  |
| plasmid stabilization protein                                       |     |                                 | 13  | ND  |
| poly-beta-hydroxybutyrate synthase                                  |     |                                 | 9   | ND  |
| poly(3-hydroxyalkanoate) polymerase                                 |     |                                 | 15  | ND  |
| poly(3-hydroxyalkanoate) synthetase                                 |     |                                 | 2   | ND  |
| poly(A) polymerase                                                  |     |                                 | 8   | ND  |
| poly(R)-hydroxyalkanoic acid synthase                               |     |                                 | 27  | ND  |
| polyamine ABC transporter ATP-binding protein                       |     |                                 | 2   | ND  |
| polyferredoxin                                                      |     |                                 | 4   | ND  |
| polyhydroxyalkanoate synthesis repressor                            |     |                                 | 3   | ND  |
| polyhydroxyalkanoate synthesis repressor PhaR                       |     |                                 | 19  | ND  |
| polymerase                                                          |     |                                 | 57  | 83  |
| polymerase beta domain protein region protein                       |     |                                 | 1   | ND  |
| polynucleotide phosphorylase                                        |     |                                 | 10  | ND  |
| polynucleotide phosphorylase/polyadenylase                          |     |                                 | 63  | 7   |
| polynucleotide phosphorylase/polyadenylase, partial                 |     |                                 | 6   | ND  |
| polyphosphate kinase                                                |     |                                 | 36  | 10  |
| polyphosphate kinase 2                                              |     |                                 | 11  | ND  |
| polyphosphate kinase, partial                                       |     |                                 | 10  | ND  |
| polynucleotide nucleotidyltransferase                               |     |                                 | 12  | ND  |
| polysaccharide biosynthesis protein                                 |     |                                 | 10  | ND  |
| polysaccharide deacetylase                                          |     |                                 | 11  | ND  |
| polysulfide reductase                                               | PSR | S                               | 90  | ND  |
| polysulfide reductase NrfD                                          |     |                                 | 29  | ND  |
| porin                                                               |     |                                 | 492 | 625 |
| porphobilinogen deaminase                                           |     |                                 | 16  | ND  |
| portal protein                                                      |     |                                 | 2   | ND  |
| potassium transporter                                               |     |                                 | 32  | ND  |
| potassium transporter peripheral membrane component                 |     |                                 | 11  | ND  |
| potassium transporter Trk                                           |     |                                 | 4   | ND  |
| potassium transporter TrkA                                          |     |                                 | 5   | ND  |
| PpiC-type peptidyl-prolyl cis-trans isomerase                       |     |                                 | 2   | ND  |
| precorrin-3B C17-methyltransferase, partial                         |     |                                 | 4   | ND  |
| precorrin-6Y C5,15-methyltransferase                                |     |                                 | 7   | ND  |
| precorrin-8X methylmutase                                           |     |                                 | 3   | ND  |
| predicted membrane protein                                          |     |                                 | 6   | ND  |
| predicted metal-sulfur cluster biosynthetic enzyme                  |     |                                 | 2   | ND  |
| prenyltransferase                                                   |     |                                 | 1   | ND  |
| prenyltransferase UbiA                                              |     |                                 | 3   | ND  |
| prephenate dehydratase                                              |     |                                 | 6   | ND  |
| prephenate dehydrogenase                                            |     |                                 | 1   | ND  |
| prepilin peptidase                                                  |     |                                 | 13  | ND  |
| preprotein translocase                                              |     |                                 | 46  | ND  |
| preprotein translocase subunit SecA                                 | SEC | S                               | 76  | 4   |
| preprotein translocase subunit SecB                                 | SEC | S                               | 4   | ND  |
| preprotein translocase subunit SecD                                 | SEC | S                               | 35  | ND  |
| preprotein translocase subunit SecE                                 | SEC | S                               | 20  | ND  |
| preprotein translocase subunit SecF                                 | SEC | S                               | 18  | ND  |
| preprotein translocase subunit SecG                                 | SEC | S                               | 15  | ND  |
| preprotein translocase subunit SecY                                 | SEC | S                               | 89  | 4   |
| preprotein translocase subunit TatB                                 | TAT | S                               | 38  | ND  |
| preprotein translocase subunit TatC                                 | TAT | S                               | 32  | ND  |
| preprotein translocase subunit Tim44                                |     |                                 | 69  | ND  |
| preprotein translocase subunit YajC                                 |     |                                 | 24  | ND  |
| preprotein translocase subunit, preprotein translocase subunit SecY | SEC | S                               | 11  | ND  |
| prevent-host-death family protein                                   | PHD |                                 | 3   | ND  |
| prevent-host-death protein                                          | PHD |                                 | 22  | ND  |
| proline-rich region                                                 |     |                                 | 147 | ND  |
| prolyl-tRNA synthetase                                              |     |                                 | 16  | ND  |
| propionyl-CoA synthetase                                            |     |                                 | 19  | 8   |
| protease                                                            |     |                                 | 47  | 6   |
| protease Do                                                         |     |                                 | 79  | 10  |
| protease HtpX                                                       |     |                                 | 10  | ND  |
| protease TldD                                                       |     |                                 | 20  | ND  |
| protein A                                                           |     |                                 | 3   | ND  |
| protein B                                                           |     |                                 | 43  | ND  |
| protein CbbY                                                        |     |                                 | 14  | ND  |
| protein containing TPR repeat                                       |     |                                 | 2   | ND  |
| protein containing bacterial Ig-like domain                         |     |                                 | 6   | ND  |
| protein containing LysM domain                                      |     |                                 | 3   | ND  |
| protein containing Por secretion system C-terminal sorting domain   |     |                                 | 2   | ND  |
| protein disaggregation chaperone                                    |     |                                 | 57  | 21  |
| protein fwdA                                                        | FWD | C (CH4)                         | 4   | ND  |
| protein K                                                           |     |                                 | 43  | ND  |
| protein MraZ                                                        |     |                                 | 26  | 12  |
| protein nirF                                                        | NIR | N                               | 13  | ND  |
| protein nirG                                                        | NIR | N                               | 5   | ND  |
| protein nirL                                                        | NIR | N                               | 10  | ND  |
| protein of unknown function DUF21, partial                          |     |                                 | 16  | ND  |
| protein phosphatase                                                 |     |                                 | 27  | ND  |
| protein serine/threonine phosphatase                                |     |                                 | 12  | ND  |
| protein sphX                                                        |     |                                 | 139 | 102 |
| protein translocase TatA                                            | TAT | S                               | 27  | ND  |
| protein translocase, SecG subunit                                   | SEC | S                               | 1   | ND  |
| protein tyrosine kinase                                             |     |                                 | 23  | ND  |
| protein-L-isospartate O-methyltransferase                           |     |                                 | 37  | ND  |

|                                                                                                            |             |  |                     |     |    |
|------------------------------------------------------------------------------------------------------------|-------------|--|---------------------|-----|----|
| protein-tyrosine kinase                                                                                    |             |  |                     | 1   | ND |
| protoheme IX farnesyltransferase                                                                           |             |  |                     | 23  | ND |
| PRTRC system protein E                                                                                     |             |  |                     | 12  | ND |
| PSE family sulfate exporter                                                                                |             |  |                     | 4   | ND |
| pseudouridine synthase                                                                                     |             |  |                     | 26  | ND |
| pseudouridine synthase, partial                                                                            |             |  |                     | 3   | ND |
| pseudouridylylase                                                                                          |             |  |                     | 22  | ND |
| pteridine reductase                                                                                        |             |  |                     | 6   | ND |
| pterin-4-alpha-carbinolamine dehydratase                                                                   |             |  |                     | 3   | ND |
| PTS fructose transporter subunit IIA                                                                       |             |  |                     | 9   | ND |
| PTS sugar transporter subunit IIA                                                                          |             |  |                     | 18  | ND |
| putative 23S ribosomal RNA                                                                                 |             |  |                     | 18  | ND |
| putative ATP-dependent protease                                                                            |             |  |                     | 16  | ND |
| putative cytochrome c oxidase subunit I                                                                    |             |  |                     | 2   | ND |
| putative Diguanylate cyclase                                                                               |             |  |                     | 2   | ND |
| putative dissimilatory nitrite reductase, partial                                                          | NIR         |  | N                   | 14  | 27 |
| putative F0F1-ATPase subunit                                                                               |             |  |                     | 4   | ND |
| Putative hemolysin                                                                                         |             |  |                     | 4   | ND |
| putative Histidine kinase                                                                                  |             |  |                     | 2   | ND |
| putative inorganic polyphosphate/ATP-NAD kinase                                                            |             |  |                     | 6   | ND |
| putative LAGLIDADG homing endonuclease (chloroplast)                                                       |             |  |                     | 11  | ND |
| Putative membrane protein                                                                                  |             |  |                     | 2   | ND |
| putative OmpR family two-component system response regulator                                               |             |  |                     | 1   | ND |
| putative PAS/PAC sensor histidine kinase                                                                   |             |  |                     | 5   | ND |
| putative PAS/PAC sensor protein                                                                            |             |  |                     | 3   | ND |
| putative peptidylprolyl isomerase                                                                          |             |  |                     | 3   | ND |
| putative porin superfamily protein                                                                         |             |  |                     | 5   | ND |
| putative primosomal replication protein                                                                    |             |  |                     | 2   | ND |
| putative reductase                                                                                         |             |  |                     | 2   | ND |
| putative RNA dependent RNA polymerase                                                                      |             |  |                     | 1   | ND |
| putative RNA polymerase beta subunit                                                                       |             |  |                     | 2   | ND |
| putative transmembrane protein                                                                             |             |  |                     | 8   | ND |
| putative transposase DNA-binding domain                                                                    | transposase |  |                     | 23  | ND |
| putative type II DNA modification enzyme                                                                   |             |  |                     | 12  | ND |
| putative zinc-finger                                                                                       |             |  |                     | 4   | ND |
| pyridine nucleotide transhydrogenase                                                                       |             |  |                     | 19  | ND |
| pyridine nucleotide-disulfide oxidoreductase                                                               |             |  |                     | 131 | ND |
| pyridoxamine 5'-phosphate oxidase                                                                          |             |  |                     | 17  | ND |
| pyridoxine 5'-phosphate synthase                                                                           |             |  |                     | 4   | 4  |
| pyrophosphatase                                                                                            |             |  |                     | 197 | 21 |
| pyrroline-5-carboxylate reductase                                                                          |             |  |                     | 18  | ND |
| pyrrolo-quinoline quinone                                                                                  |             |  |                     | 6   | ND |
| pyruvate carboxylase                                                                                       |             |  |                     | 39  | ND |
| pyruvate carboxylase subunit A                                                                             |             |  |                     | 5   | ND |
| pyruvate dehydrogenase                                                                                     | PDH         |  | C (EMP Glycolysis)  | 104 | 3  |
| pyruvate ferredoxin oxidoreductase                                                                         | PFOR        |  | C (fermentation)    | 60  | ND |
| pyruvate formate lyase-activating protein                                                                  | PFL-AE      |  | C (fermentation)    | 5   | ND |
| pyruvate kinase                                                                                            | PK          |  | C (EMP Glycolysis)  | 74  | 2  |
| pyruvate phosphate dikinase                                                                                | PPDK        |  | C (Gluconeogenesis) | 67  | 6  |
| pyruvate phosphate dikinase PEP/pyruvate-binding protein                                                   | PPDK        |  | C (Gluconeogenesis) | 3   | ND |
| pyruvate phosphate dikinase, partial                                                                       | PPDK        |  | C (Gluconeogenesis) | 4   | ND |
| pyruvate synthase                                                                                          | PK          |  | C (EMP Glycolysis)  | 2   | ND |
| pyruvate-flavodoxin oxidoreductase                                                                         |             |  |                     | 29  | ND |
| pyruvate_water dikinase                                                                                    |             |  | C (fermentation)    | 25  | ND |
| pyruvate/2-oxoglutarate dehydrogenase complex, dehydrogenase (E1) component, eukaryotic type, beta subunit |             |  |                     | 2   | ND |
| quinol dehydrogenase                                                                                       |             |  |                     | 302 | ND |
| quinol-dependent nitric oxide reductase, partial                                                           |             |  |                     | 2   | ND |
| quinolinate synthetase                                                                                     |             |  |                     | 6   | ND |
| quinone oxidoreductase                                                                                     |             |  |                     | 48  | 13 |
| radical activating enzyme                                                                                  |             |  |                     | 6   | ND |
| radical SAM protein                                                                                        |             |  |                     | 54  | 2  |
| radical SAM protein, partial                                                                               |             |  |                     | 1   | ND |
| RCC1 repeat-containing protein, partial                                                                    |             |  |                     | 3   | ND |
| RDD domain containing protein                                                                              |             |  |                     | 4   | ND |
| RecA, partial                                                                                              |             |  |                     | 12  | ND |
| RecName: Full=Cytochrome c-552; AltName: Full=Cytochrome c nitrite reductase; AltName: Full=TvNir; Flag    | ccNIR       |  | N                   | 8   | ND |
| recombinase RdgC                                                                                           |             |  |                     | 3   | ND |
| recombinase RecA                                                                                           |             |  |                     | 6   | ND |
| recombinase RecR                                                                                           |             |  |                     | 7   | ND |
| recombinase RecX                                                                                           |             |  |                     | 2   | ND |
| recombinase XerD                                                                                           |             |  |                     | 4   | ND |
| recombination factor protein RarA                                                                          |             |  |                     | 9   | 2  |
| recombination protein RecR                                                                                 |             |  |                     | 12  | ND |
| RecT protein                                                                                               |             |  |                     | 2   | ND |
| reductase                                                                                                  |             |  |                     | 137 | 41 |
| regulator                                                                                                  |             |  |                     | 28  | ND |
| RepI p                                                                                                     |             |  |                     | 2   | ND |
| repressor                                                                                                  |             |  |                     | 50  | ND |
| response regulator receiver                                                                                |             |  |                     | 11  | ND |
| restriction endonuclease                                                                                   |             |  |                     | 6   | ND |
| restriction endonuclease BglII                                                                             |             |  |                     | 9   | ND |
| restriction endonuclease, partial                                                                          |             |  |                     | 10  | ND |
| reverse dissimilatory sulfite reductase alpha subunit                                                      | rDSR        |  | S                   | 3   | ND |
| reverse dissimilatory sulfite reductase alpha subunit, partial                                             | rDSR        |  | S                   | 10  | ND |
| reverse-type dissimilatory siroheme sulfite reductase subunit A                                            | rDSR        |  | S                   | 33  | 37 |
| reverse-type dissimilatory siroheme sulfite reductase subunit B                                            | rDSR        |  | S                   | 8   | 7  |
| rhodanese                                                                                                  |             |  |                     | 26  | ND |
| Rhodanese domain protein                                                                                   |             |  |                     | 3   | ND |
| rhodanese domain-containing protein                                                                        |             |  |                     | 10  | ND |
| riboflavin biosynthesis protein RibD                                                                       |             |  |                     | 9   | ND |
| riboflavin synthase subunit alpha                                                                          |             |  |                     | 29  | ND |
| ribonuclease                                                                                               |             |  |                     | 38  | ND |
| ribonuclease E                                                                                             |             |  |                     | 38  | ND |
| ribonuclease H                                                                                             |             |  |                     | 3   | ND |
| ribonuclease II                                                                                            |             |  |                     | 1   | ND |
| ribonuclease III                                                                                           |             |  |                     | 4   | ND |
| ribonuclease J                                                                                             |             |  |                     | 27  | ND |
| ribonuclease P                                                                                             |             |  |                     | 2   | ND |
| ribonuclease P protein component                                                                           |             |  |                     | 1   | ND |
| ribonuclease PH                                                                                            |             |  |                     | 5   | ND |
| ribonuclease R                                                                                             |             |  |                     | 3   | ND |
| ribonuclease Y                                                                                             |             |  |                     | 1   | ND |
| ribonucleoside reductase                                                                                   |             |  |                     | 3   | ND |

|                                                                               |             |                                                  |     |     |
|-------------------------------------------------------------------------------|-------------|--------------------------------------------------|-----|-----|
| ribonucleoside-diphosphate reductase                                          |             |                                                  | 2   | ND  |
| ribonucleoside-triphosphate reductase                                         |             |                                                  | 3   | ND  |
| ribonucleotide reductase                                                      |             |                                                  | 45  | ND  |
| ribose 1,5-bisphosphate phosphokinase                                         |             |                                                  | 5   | ND  |
| ribose-phosphate pyrophosphokinase                                            |             |                                                  | 19  | ND  |
| ribosomal protein S1                                                          |             |                                                  | 4   | ND  |
| ribosomal protein S12 methyltransferase                                       |             |                                                  | 8   | ND  |
| ribosomal RNA large subunit methyltransferase N, partial                      |             |                                                  | 9   | ND  |
| ribosomal-protein-alanine acetyltransferase                                   |             |                                                  | 11  | ND  |
| ribosome hibernation promoting factor HPF                                     |             |                                                  | 7   | ND  |
| ribosome maturation factor RimM                                               |             |                                                  | 42  | ND  |
| ribosome maturation factor RimP                                               |             |                                                  | 5   | ND  |
| ribosome maturation protein RimP                                              |             |                                                  | 11  | ND  |
| ribosome recycling factor                                                     |             |                                                  | 18  | ND  |
| ribosome silencing factor RsfS                                                |             |                                                  | 24  | ND  |
| ribosome-associated GTPase EngA                                               |             |                                                  | 2   | ND  |
| ribosome-associated inhibitor A/sigma 54 modulation protein                   |             |                                                  | 11  | ND  |
| ribosome-binding factor A                                                     |             |                                                  | 4   | ND  |
| ribosome-recycling factor                                                     |             |                                                  | 12  | ND  |
| ribulose 1,5-bisphosphate carboxylase                                         | RuBisCo     | C (Calvin-Benson-Bassham cycle)                  | 313 | 405 |
| ribulose 1,5-bisphosphate carboxylase small subunit                           | RuBisCo     | C (Calvin-Benson-Bassham cycle)                  | 67  | 3   |
| ribulose bisphosphate carboxylase                                             | RuBisCo     | C (Calvin-Benson-Bassham cycle)                  | 108 | 133 |
| ribulose bisphosphate carboxylase large chain                                 | RuBisCo     | C (Calvin-Benson-Bassham cycle)                  | 18  | ND  |
| ribulose bisphosphate carboxylase small chain                                 | RuBisCo     | C (Calvin-Benson-Bassham cycle)                  | 290 | 207 |
| ribulose-1,5-bisphosphate carboxylase/oxygenase large subunit                 | RuBisCo     | C (Calvin-Benson-Bassham cycle)                  | 9   | 8   |
| ribulose-1,5-bisphosphate carboxylase/oxygenase large subunit form I, partial | RuBisCo     | C (Calvin-Benson-Bassham cycle)                  | 51  | 25  |
| ribulose-phosphate 3-epimerase                                                | RPE         | C (Calvin-Benson-Bassham cycle)                  | 28  | ND  |
| RNA chaperone Hfq                                                             |             |                                                  | 27  | ND  |
| RNA helicase                                                                  |             |                                                  | 42  | ND  |
| RNA helicase, partial                                                         |             |                                                  | 3   | ND  |
| RNA methyltransferase                                                         |             |                                                  | 5   | ND  |
| RNA polymerase beta subunit                                                   |             |                                                  | 24  | 37  |
| RNA polymerase ECF-type sigma factor                                          |             |                                                  | 5   | ND  |
| RNA polymerase factor sigma-32                                                |             |                                                  | 128 | ND  |
| RNA polymerase factor sigma-54                                                |             |                                                  | 3   | ND  |
| RNA polymerase primary sigma factor                                           |             |                                                  | 1   | ND  |
| RNA polymerase sigma factor                                                   |             |                                                  | 19  | ND  |
| RNA polymerase sigma factor AlgU                                              |             |                                                  | 4   | ND  |
| RNA polymerase sigma factor RpoD                                              |             |                                                  | 91  | ND  |
| RNA polymerase sigma factor RpoE                                              |             |                                                  | 70  | ND  |
| RNA polymerase sigma factor, sigma-70 family                                  |             |                                                  | 12  | ND  |
| RNA polymerase sigma-H factor                                                 |             |                                                  | 11  | ND  |
| RNA polymerase sigma24 factor                                                 |             |                                                  | 8   | ND  |
| RNA polymerase subunit B, partial                                             |             |                                                  | 6   | 18  |
| RNA polymerase subunit sigma-24                                               |             |                                                  | 40  | ND  |
| RNA polymerase subunit sigma-54                                               |             |                                                  | 40  | ND  |
| RNA polymerase, sigma subunit, ECF family                                     |             |                                                  | 2   | ND  |
| RNA pyrophosphohydrolase                                                      |             |                                                  | 23  | ND  |
| RNA-binding protein                                                           |             |                                                  | 13  | ND  |
| RNA-binding protein S1                                                        |             |                                                  | 2   | ND  |
| RNA-dependent RNA polymerase                                                  |             |                                                  | 2   | ND  |
| RNA-dependent RNA polymerase, partial                                         |             |                                                  | 22  | ND  |
| RNAase                                                                        |             |                                                  | 8   | ND  |
| RND family efflux transporter, MFP subunit                                    |             |                                                  | 7   | ND  |
| RND transporter                                                               |             |                                                  | 58  | ND  |
| RND transporter, partial                                                      |             |                                                  | 3   | ND  |
| rod shape-determining protein Mbl                                             |             |                                                  | 6   | ND  |
| rod shape-determining protein MreB                                            |             |                                                  | 64  | 17  |
| rod shape-determining protein MreC                                            |             |                                                  | 1   | ND  |
| ROK family transcriptional regulator                                          |             |                                                  | 2   | ND  |
| Rrf2 family transcriptional regulator                                         |             |                                                  | 3   | ND  |
| rubredoxin                                                                    |             |                                                  | 55  | ND  |
| rubrerythrin                                                                  |             |                                                  | 425 | ND  |
| S-adenosyl-L-homocysteine hydrolase                                           |             |                                                  | 21  | ND  |
| S-adenosylmethionine decarboxylase                                            |             |                                                  | 5   | ND  |
| S-adenosylmethionine synthase                                                 |             |                                                  | 4   | ND  |
| S-adenosylmethionine synthetase                                               |             |                                                  | 15  | ND  |
| S-adenosylmethionine-dependent methyltransferase                              |             |                                                  | 3   | ND  |
| S-layer protein                                                               |             |                                                  | 9   | 23  |
| S23 ribosomal protein                                                         |             |                                                  | 2   | ND  |
| SAM-dependent methyltransferase                                               |             |                                                  | 6   | ND  |
| scaffolding protein D, partial                                                |             |                                                  | 3   | ND  |
| secretin                                                                      |             |                                                  | 40  | 42  |
| Secretion protein HlyD                                                        |             |                                                  | 12  | ND  |
| secretion system protein E                                                    |             |                                                  | 10  | ND  |
| SEF                                                                           |             |                                                  | 6   | ND  |
| segregation and condensation protein A                                        |             |                                                  | 5   | ND  |
| Se11 domain protein repeat-containing protein                                 |             |                                                  | 3   | ND  |
| selenium metabolism protein YedF                                              |             |                                                  | 6   | ND  |
| semialdehyde dehydrogenase                                                    |             |                                                  | 5   | ND  |
| sensor histidine kinase                                                       |             |                                                  | 3   | ND  |
| sensor histidine kinase/response regulator                                    |             |                                                  | 2   | ND  |
| sensor histidine kinase/response regulator, partial                           |             |                                                  | 65  | 10  |
| Sensor protein                                                                |             |                                                  | 1   | ND  |
| septum formation inhibitor Maf                                                |             |                                                  | 2   | ND  |
| ser/threonine protein phosphatase                                             |             |                                                  | 20  | ND  |
| serine acetyltransferase                                                      |             |                                                  | 23  | ND  |
| serine hydroxymethyltransferase                                               | SHMT (glyA) | C (formaldehyde assimilation via serine pathway) | 26  | 5   |
| serine O-acetyltransferase                                                    |             |                                                  | 2   | ND  |
| serine peptidase                                                              |             |                                                  | 13  | ND  |
| serine protease                                                               |             |                                                  | 45  | ND  |
| serine/threonine protein kinase                                               |             |                                                  | 21  | ND  |
| serine/threonine protein phosphatase                                          |             |                                                  | 5   | ND  |
| serine/threonine protein phosphatase, partial                                 |             |                                                  | 23  | ND  |
| seryl-tRNA synthetase                                                         |             |                                                  | 9   | ND  |
| shikimate dehydrogenase                                                       |             |                                                  | 21  | ND  |
| shikimate kinase                                                              |             |                                                  | 19  | ND  |
| short chain dehydrogenase                                                     |             |                                                  | 14  | ND  |
| siderophore-interacting protein                                               |             |                                                  | 11  | ND  |
| sigma E regulatory protein, MucB/RseB                                         |             |                                                  | 3   | ND  |
| Sigma-70-like protein                                                         |             |                                                  | 3   | ND  |
| sigma-E factor negative regulatory protein                                    |             |                                                  | 3   | ND  |
| signal peptidase                                                              |             |                                                  | 5   | ND  |

|                                                                   |      |          |      |      |
|-------------------------------------------------------------------|------|----------|------|------|
| signal recognition particle protein                               |      |          | 52   | ND   |
| signal transduction histidine kinase                              |      |          | 39   | ND   |
| signal transduction protein                                       |      |          | 11   | ND   |
| single-strand binding protein                                     |      |          | 2    | ND   |
| single-stranded DNA exonuclease                                   |      |          | 1    | ND   |
| single-stranded DNA-binding protein                               |      |          | 72   | ND   |
| SirA family protein                                               |      |          | 38   | 12   |
| siroheme synthase                                                 |      |          | 4    | ND   |
| sirohychlorin ferrochelutase                                      |      |          | 6    | ND   |
| SMC-Sep complex subunit SepB                                      |      |          | 15   | 5    |
| SNF2 domain/helicase domain/RING finger domain-containing protein |      |          | 8    | ND   |
| sodium/calcium antiporter                                         |      |          | 18   | ND   |
| sodium/proton antiporter                                          |      |          | 30   | ND   |
| sodium/proton exchanger                                           |      |          | 26   | ND   |
| sodium/solute symporter                                           |      |          | 163  | 2    |
| sodium/hydrogen exchanger                                         |      |          | 6    | ND   |
| sodium/sulfate symporter                                          |      |          | 1    | ND   |
| solute-binding protein                                            |      |          | 16   | ND   |
| spermine synthase                                                 |      |          | 2    | ND   |
| spore coat protein                                                |      |          | 4    | ND   |
| sporulation protein                                               |      |          | 32   | ND   |
| sporulation regulator WhiA                                        |      |          | 3    | ND   |
| SSU ribosomal protein S21P                                        |      |          | 5    | ND   |
| stationary phase survival protein SurE                            |      |          | 8    | ND   |
| sterol-binding protein                                            |      |          | 10   | 2    |
| stress response protein                                           |      |          | 16   | ND   |
| stringent starvation protein A                                    |      |          | 2    | ND   |
| Sua5/YciO/YrdC/YwlC family protein                                |      |          | 3    | ND   |
| succinate dehydrogenase                                           |      |          | 98   | ND   |
| succinate dehydrogenase flavoprotein subunit                      |      |          | 78   | 5    |
| succinyl-CoA synthetase subunit alpha                             | SCS  | C (rTCA) | 7    | ND   |
| succinyl-CoA synthetase subunit beta                              | SCS  | C (rTCA) | 6    | ND   |
| succinyl-diaminopimelate desuccinylase                            |      |          | 3    | ND   |
| succinyl-diaminopimelate aminotransferase                         |      |          | 5    | ND   |
| sugar ABC transporter permease                                    |      |          | 6    | ND   |
| sugar ABC transporter substrate-binding protein                   |      |          | 102  | 49   |
| sugar kinase                                                      |      |          | 14   | ND   |
| sugar transferase                                                 |      |          | 11   | ND   |
| sugar transporter                                                 |      |          | 18   | ND   |
| sulfate ABC transporter ATP-binding protein                       |      |          | 43   | ND   |
| sulfate ABC transporter substrate-binding protein                 |      |          | 4    | ND   |
| sulfate adenylyltransferase                                       | SAT  | S        | 157  | 102  |
| sulfate permease                                                  |      | S        | 13   | ND   |
| sulfate transporter                                               |      | S        | 71   | ND   |
| sulfide:quinone reductase                                         | SQR  | S        | 2    | ND   |
| sulfite dehydrogenase                                             | SOR  | S        | 4    | ND   |
| sulfite reductase                                                 | SOR  | S        | 1000 | 1156 |
| sulfite reductase dissimilatory-type beta subunit, partial        | rDSR | S        | 8    | 22   |
| sulfite reductase subunit alpha                                   | SOR  | S        | 3    | ND   |
| sulfite reductase subunit gamma                                   | SOR  | S        | 110  | 152  |
| sulfonate ABC transporter substrate-binding protein               |      | S        | 2    | ND   |
| sulfoxide reductase catalytic subunit YedY                        |      | S        | 7    | ND   |
| sulfur acceptor protein CsdL                                      |      | S        | 3    | ND   |
| sulfur oxidation c-type cytochrome SoxA                           | SOX  | S        | 30   | ND   |
| sulfur oxidation c-type cytochrome SoxX                           | SOX  | S        | 12   | ND   |
| sulfur oxidation protein DsrM                                     | DSR  | S        | 8    | ND   |
| sulfur oxidoreductase                                             | SOR  | S        | 150  | 36   |
| sulfur relay protein DsrC                                         |      | S        | 13   | 4    |
| sulfur relay protein TusB                                         |      | S        | 28   | ND   |
| sulfur relay protein TusB/DsrH                                    |      | S        | 150  | 28   |
| sulfur transfer protein TusE                                      |      | S        | 520  | 194  |
| sulfurtransferase                                                 |      | S        | 293  | 18   |
| SulP family inorganic anion transporter                           |      |          | 4    | ND   |
| superfamily I DNA/RNA helicase                                    |      |          | 2    | ND   |
| superoxide dismutase                                              |      |          | 128  | 31   |
| TadE family protein                                               |      |          | 17   | ND   |
| tail fiber assembly protein                                       | tail |          | 14   | ND   |
| tail length tape measure protein                                  | tail |          | 2    | ND   |
| tail protein                                                      | tail |          | 2    | ND   |
| Tail sheath                                                       | tail |          | 2    | ND   |
| tartronate semialdehyde reductase                                 |      |          | 35   | 4    |
| taurine catabolism dioxygenase TauD                               |      |          | 33   | ND   |
| teicoplanin resistance protein VanZ                               |      |          | 7    | ND   |
| tellurite resistance protein-like permease                        |      |          | 18   | ND   |
| Tellurite resistance TerB                                         |      |          | 2    | ND   |
| TetR family transcriptional regulator                             |      |          | 116  | ND   |
| tetrahydromethanopterin S-methyltransferase subunit D             | MTR  | C (CH4)  | 2    | ND   |
| tetrahydromethanopterin S-methyltransferase subunit E             | MTR  | C (CH4)  | 9    | ND   |
| tetrathionate reductase                                           | TET  | S        | 37   | ND   |
| tetrathionate reductase subunit A                                 | TET  | S        | 48   | ND   |
| tetrathionate reductase subunit B                                 | TET  | S        | 42   | ND   |
| tetratricopeptide domain-containing protein                       |      |          | 2    | ND   |
| Tfp pilus assembly protein, tip-associated adhesin PilY1          |      |          | 3    | ND   |
| thiamine biosynthesis protein ThiC                                |      |          | 21   | ND   |
| thiamine biosynthesis protein ThiF                                |      |          | 17   | ND   |
| thiamine biosynthesis protein ThiH                                |      |          | 3    | ND   |
| thiamine biosynthesis protein ThiS                                |      |          | 2    | ND   |
| thiamine monophosphate kinase                                     |      |          | 1    | ND   |
| thiamine-phosphate kinase                                         |      |          | 4    | ND   |
| thiazole synthase                                                 |      |          | 15   | ND   |
| thioesterase                                                      |      |          | 27   | ND   |
| thiol peroxidase                                                  |      |          | 14   | ND   |
| thiol:disulfide interchange protein                               |      |          | 104  | ND   |
| thiol:disulfide interchange protein DsbC                          |      |          | 5    | ND   |
| thioredoxin                                                       | SOX  | S        | 214  | 32   |
| thioredoxin reductase                                             |      |          | 34   | ND   |
| thiosulfate oxidation carrier complex protein SoxZ                | SOX  | S        | 64   | 6    |
| thiosulfate oxidation carrier protein SoxY                        | SOX  | S        | 159  | ND   |
| thiosulfate reductase                                             | PHS  | S        | 74   | ND   |
| thiosulfhydrylase SoxB                                            | SOX  | S        | 3    | ND   |
| threonine dehydratase                                             |      |          | 8    | ND   |
| threonine synthase                                                |      |          | 17   | 5    |
| threonine-phosphate decarboxylase                                 |      |          | 23   | ND   |



|                                                                          |             |                                                        |     |     |
|--------------------------------------------------------------------------|-------------|--------------------------------------------------------|-----|-----|
| threonyl-tRNA synthetase                                                 |             |                                                        | 73  | ND  |
| thymidylate kinase                                                       |             |                                                        | 3   | ND  |
| thymidylate synthase                                                     |             |                                                        | 18  | ND  |
| tol-pal system protein YbgF                                              |             |                                                        | 12  | ND  |
| toluene ABC transporter ATP-binding protein                              |             |                                                        | 17  | ND  |
| TonB-dependent receptor                                                  |             |                                                        | 41  | 13  |
| toxin                                                                    |             |                                                        | 5   | ND  |
| toxin RelE                                                               |             |                                                        | 34  | ND  |
| toxin YoeB                                                               |             |                                                        | 6   | ND  |
| transcription antitermination protein nusG                               |             |                                                        | 6   | ND  |
| transcription elongation factor GreA                                     |             |                                                        | 9   | ND  |
| transcription elongation factor GreB                                     |             |                                                        | 2   | ND  |
| transcription elongation protein NusA                                    |             |                                                        | 1   | ND  |
| transcription termination factor NusA                                    |             |                                                        | 75  | 3   |
| transcription termination factor Rho                                     |             |                                                        | 52  | ND  |
| transcription termination/antitermination factor NusG                    |             |                                                        | 78  | ND  |
| transcription-repair coupling factor                                     |             |                                                        | 3   | ND  |
| transcriptional initiation protein Tat                                   |             |                                                        | 4   | ND  |
| transcriptional regulator                                                |             |                                                        | 730 | 187 |
| transcriptional regulator HU subunit alpha                               |             |                                                        | 5   | ND  |
| transcriptional regulator NarL                                           |             | N                                                      | 5   | ND  |
| Transcriptional regulator, Crp/Fnr family protein                        |             |                                                        | 5   | ND  |
| transcriptional regulator, partial                                       |             |                                                        | 16  | ND  |
| transferase                                                              |             |                                                        | 10  | ND  |
| transglycosylase                                                         |             |                                                        | 13  | ND  |
| transketolase                                                            | TKT         | C (Calvin-Benson-Bassham cycle)                        | 98  | 11  |
| transketolase, partial                                                   | TKT         | C (Calvin-Benson-Bassham cycle)                        | 2   | ND  |
| translation elongation factor 2                                          |             |                                                        | 8   | ND  |
| translation elongation factor P                                          |             |                                                        | 5   | ND  |
| translation factor Sua5                                                  |             |                                                        | 11  | ND  |
| translation initiation factor IF-1                                       |             |                                                        | 51  | ND  |
| translation initiation factor IF-2                                       |             |                                                        | 38  | ND  |
| translation initiation factor IF-2, partial                              |             |                                                        | 6   | ND  |
| translation initiation factor IF-3                                       |             |                                                        | 125 | 3   |
| translocation protein TolB                                               |             |                                                        | 33  | ND  |
| transpeptidase                                                           |             |                                                        | 4   | ND  |
| transporter                                                              |             |                                                        | 96  | ND  |
| transposase                                                              | transposase |                                                        | 192 | ND  |
| transposase, partial                                                     | transposase |                                                        | 22  | ND  |
| trehalose 6-phosphate phosphorylase                                      |             |                                                        | 1   | ND  |
| trigger factor                                                           |             |                                                        | 44  | 47  |
| triosephosphate isomerase                                                | TPI         | C (Calvin-Benson-Bassham cycle) and C (EMP Glycolysis) | 47  | ND  |
| TrmB family transcriptional regulator                                    |             |                                                        | 3   | ND  |
| tRNA (5-methylaminomethyl-2-thiouridylylate)-methyltransferase           |             |                                                        | 17  | ND  |
| tRNA (cytidine/uridine-2'-O-)-methyltransferase                          |             |                                                        | 1   | ND  |
| tRNA (guanine-N(1)-)-methyltransferase                                   |             |                                                        | 5   | ND  |
| tRNA (guanine-N1)-methyltransferase                                      |             |                                                        | 54  | ND  |
| tRNA 2-selenouridine synthase                                            |             |                                                        | 2   | ND  |
| tRNA delta(2)-isopentenylpyrophosphate transferase                       |             |                                                        | 5   | ND  |
| tRNA methyltransferase                                                   |             |                                                        | 1   | ND  |
| tRNA modification GTPase TrmE                                            |             |                                                        | 2   | ND  |
| tRNA pseudouridine synthase A                                            |             |                                                        | 2   | ND  |
| tRNA pseudouridine synthase A, tRNA pseudouridine38-40 synthase          |             |                                                        | 7   | ND  |
| tRNA pseudouridine synthase B                                            |             |                                                        | 14  | ND  |
| tRNA-2-methylthio-N(6)-dimethylallyladenosine synthase                   |             |                                                        | 2   | ND  |
| tRNA-dihydrouridine synthase                                             |             |                                                        | 4   | ND  |
| tRNA-dihydrouridine synthase A                                           |             |                                                        | 5   | ND  |
| tRNA-dihydrouridine synthase B                                           |             |                                                        | 10  | ND  |
| tRNA(Ile)-lysidine synthetase                                            |             |                                                        | 14  | ND  |
| trypsin                                                                  |             |                                                        | 3   | ND  |
| tryptophan synthase alpha chain                                          |             |                                                        | 19  | ND  |
| tryptophan synthase subunit alpha                                        |             |                                                        | 28  | ND  |
| tryptophan synthase subunit beta                                         |             |                                                        | 34  | ND  |
| tryptophan-tRNA ligase                                                   |             |                                                        | 35  | ND  |
| tungsten ABC transporter substrate-binding protein                       |             |                                                        | 19  | ND  |
| twin-arginine translocation pathway signal protein                       |             |                                                        | 190 | 20  |
| twitching motility protein PilT                                          |             |                                                        | 147 | ND  |
| type 4 pilus biogenesis                                                  |             |                                                        | 20  | ND  |
| type I deoxyribonuclease HsdR                                            |             |                                                        | 12  | ND  |
| type I secretion target GGXGDXXXX repeat protein                         |             |                                                        | 10  | ND  |
| type II and III secretion system protein                                 |             |                                                        | 3   | ND  |
| type II citrate synthase                                                 |             |                                                        | 56  | 13  |
| type II secretion system protein                                         |             |                                                        | 6   | ND  |
| type II secretion system protein E                                       |             |                                                        | 25  | ND  |
| type II secretion system protein F                                       |             |                                                        | 66  | ND  |
| type III restriction-modification system, res subunit, partial           |             |                                                        | 4   | ND  |
| type IV fimbrial biogenesis protein PilY1                                |             |                                                        | 6   | ND  |
| type IV pilus assembly protein PilX                                      |             |                                                        | 20  | ND  |
| type IV pilus modification protein PilV                                  |             |                                                        | 5   | ND  |
| type VI secretion system effector                                        |             |                                                        | 4   | ND  |
| tyrosine recombinase XerC                                                |             |                                                        | 4   | ND  |
| tyrosine recombinase XerD                                                |             |                                                        | 5   | ND  |
| tyrosyl-tRNA synthetase                                                  |             |                                                        | 20  | 10  |
| ubiquinol-cytochrome C reductase                                         |             |                                                        | 10  | ND  |
| ubiquinone biosynthesis hydroxylase                                      |             |                                                        | 20  | ND  |
| ubiquinone biosynthesis methyltransferase UbiE                           |             |                                                        | 16  | ND  |
| ubiquinone biosynthesis protein UbiB                                     |             |                                                        | 23  | ND  |
| ubiquinone biosynthesis protein UbiH                                     |             |                                                        | 23  | ND  |
| ubiquinone/menaquinone biosynthesis C-methyltransferase UbiE             |             |                                                        | 3   | ND  |
| ubiquinone/menaquinone biosynthesis methyltransferase                    |             |                                                        | 3   | ND  |
| UDP diphosphate synthase                                                 |             |                                                        | 7   | ND  |
| UDP pyrophosphate phosphatase                                            |             |                                                        | 8   | ND  |
| UDP-3-O-(3-hydroxymyristoyl) glucosamine N-acyltransferase               |             |                                                        | 70  | ND  |
| UDP-3-O-(3-hydroxymyristoyl) N-acetylglucosamine deacetylase             |             |                                                        | 102 | ND  |
| UDP-diphospho-muramoylpentapeptide beta-N- acetylglucosaminyltransferase |             |                                                        | 1   | ND  |
| UDP-galactose-4-epimerase                                                |             |                                                        | 4   | ND  |
| UDP-glucose 4-epimerase                                                  |             |                                                        | 2   | ND  |
| UDP-glucose 6-dehydrogenase                                              |             |                                                        | 5   | ND  |
| UDP-N-acetyl-D-galactosamine dehydrogenase                               |             |                                                        | 13  | ND  |
| UDP-N-acetylenolpyruvylglucosamine reductase                             |             |                                                        | 12  | ND  |
| UDP-N-acetylglucosamine 1-carboxyvinyltransferase                        |             |                                                        | 9   | ND  |
| UDP-N-acetylglucosamine 2-epimerase                                      |             |                                                        | 4   | ND  |
| UDP-N-acetylglucosamine acyltransferase                                  |             |                                                        | 4   | ND  |

|                                                                                                            |     |   |     |     |
|------------------------------------------------------------------------------------------------------------|-----|---|-----|-----|
| UDP-N-acetylglucosamine pyrophosphorylase                                                                  |     |   | 6   | ND  |
| UDP-N-acetylglucosamine--N-acetylmuramyl-(pentapeptide) pyrophosphoryl-UDP N-acetylglucosamine transferase |     |   | 8   | ND  |
| UDP-N-acetylmuramate--alanine ligase                                                                       |     |   | 4   | ND  |
| UDP-N-acetylmuramate-L-alanyl-gamma-D-glutamyl-meso-diaminopimelate ligase                                 |     |   | 9   | ND  |
| UDP-N-acetylmuramoyl-L-alanyl-D-glutamate synthetase                                                       |     |   | 23  | ND  |
| UDP-N-acetylmuramoyl-tripeptide--D-alanyl-D-alanine ligase                                                 |     |   | 13  | ND  |
| UDP-N-acetylmuramoyl-tripeptide--D-alanyl-D-alanine ligase, partial                                        |     |   | 1   | ND  |
| UDP-N-acetylmuramoylalanyl-D-glutamate--2, 6-diaminopimelate ligase                                        |     |   | 4   | ND  |
| UDP-phosphate glucose phosphotransferase                                                                   |     |   | 14  | ND  |
| uncharacterized protein BN903_36                                                                           |     |   | 522 | ND  |
| uncharacterized protein OXB_0016                                                                           |     |   | 13  | ND  |
| universal stress protein                                                                                   |     |   | 90  | ND  |
| universal stress protein UspA                                                                              |     |   | 94  | ND  |
| UNKNOWN                                                                                                    |     |   | 111 | ND  |
| unnamed protein product                                                                                    |     |   | 6   | ND  |
| unnamed protein product, partial                                                                           |     |   | 395 | ND  |
| uracil phosphoribosyltransferase                                                                           |     |   | 6   | ND  |
| urease accessory protein UreJ                                                                              | URE | N | 3   | ND  |
| uridylyate kinase                                                                                          |     |   | 33  | ND  |
| uroporphyrinogen decarboxylase                                                                             |     |   | 24  | 5   |
| uroporphyrinogen III methyltransferase                                                                     |     |   | 6   | ND  |
| UTP--glucose-1-phosphate uridylyltransferase                                                               |     |   | 12  | ND  |
| VacJ family lipoprotein                                                                                    |     |   | 2   | ND  |
| valyl-tRNA synthetase                                                                                      |     |   | 31  | 5   |
| virulence factor                                                                                           |     |   | 35  | ND  |
| virulence protein E                                                                                        |     |   | 12  | ND  |
| VWA domain-containing protein                                                                              |     |   | 239 | 22  |
| Xaa-Pro aminopeptidase                                                                                     |     |   | 5   | ND  |
| XRE family transcriptional regulator                                                                       |     |   | 91  | 5   |
| xylose ABC transporter substrate-binding protein                                                           |     |   | 2   | ND  |
| xylulokinase                                                                                               |     |   | 4   | ND  |
| YeeE/YedE                                                                                                  |     |   | 5   | ND  |
| YHS domain protein                                                                                         |     |   | 1   | ND  |
| zinc finger protein                                                                                        |     |   | 2   | ND  |
| zinc metalloproteinase                                                                                     |     |   | 3   | ND  |
| zinc protease                                                                                              |     |   | 30  | ND  |
| zinc transporter ZupT                                                                                      |     |   | 16  | ND  |
| zinc-finger protein                                                                                        |     |   | 3   | ND  |
| Zn-dependent hydrolase                                                                                     |     |   | 12  | ND  |
| Zn-dependent protease                                                                                      |     |   | 8   | ND  |
| blastp detected no putative conserved domains                                                              |     |   | 9   | 11  |
| None                                                                                                       |     |   | 400 | 457 |

**Table S7. Simulation parameters for sulfate reduction and sulfide oxidation reactions.**

|                                           | $4\text{H}_2 + \text{SO}_4^{2-} + \text{H}^+$<br>$\Rightarrow \text{HS}^- + 4\text{H}_2\text{O}$ | $\text{HS}^- + 2\text{O}_2$<br>$\Rightarrow \text{SO}_4^{2-} + \text{H}^+$ | $0.5\text{HS}^- + 0.8\text{NO}_3^- + 0.3\text{H}^+$<br>$\Rightarrow 0.5\text{SO}_4^{2-} + 0.4\text{N}_2 + 0.4\text{H}_2\text{O}$ | $2\text{H}_2 + \text{O}_2$<br>$\Rightarrow 2\text{H}_2\text{O}$ | $\text{H}_2 + 0.4\text{H}^+ + 0.4\text{NO}_3^-$<br>$\Rightarrow 0.2\text{N}_2 + 1.2\text{H}_2\text{O}$ |
|-------------------------------------------|--------------------------------------------------------------------------------------------------|----------------------------------------------------------------------------|----------------------------------------------------------------------------------------------------------------------------------|-----------------------------------------------------------------|--------------------------------------------------------------------------------------------------------|
| Growth Yield<br>(mg/mol of reactant)      | 2400 <sup>a</sup>                                                                                | 8000 <sup>b</sup>                                                          | 9410 <sup>d</sup>                                                                                                                | 50 <sup>c</sup>                                                 | 2800 <sup>f</sup>                                                                                      |
| $V_{\text{max}}$<br>(mol/mg-s)            | $2 \times 10^{-10}$                                                                              | $3 \times 10^{-11}$                                                        | $3 \times 10^{-11}$                                                                                                              | $3 \times 10^{-11}$                                             | $3 \times 10^{-11}$                                                                                    |
| $\Delta_{\text{ATP}}$<br>(kJ/mole of ATP) | -60                                                                                              | -60                                                                        | -60                                                                                                                              | -232 <sup>c</sup>                                               | -265 <sup>g</sup>                                                                                      |
| $m_{\text{ATP}}$<br>(mole)                | 1.3                                                                                              | 3 <sup>c</sup>                                                             | 2 <sup>c</sup>                                                                                                                   | 2 <sup>c</sup>                                                  | 0.666 <sup>g</sup>                                                                                     |
| $K_{\text{D}}$<br>( $\mu\text{M}$ )       | 1                                                                                                | 7                                                                          | 7                                                                                                                                | 100                                                             | 3                                                                                                      |
| $K_{\text{A}}$<br>( $\mu\text{M}$ )       | 3                                                                                                | 10                                                                         | 3                                                                                                                                | 50                                                              | 5                                                                                                      |

Note:

<sup>a</sup> Widdel & Pfenning, 1981 (ref. 98)

<sup>b</sup> Sublette, 1987 (ref. 90)

<sup>c</sup> Kelly, 1999 (ref. 89)

<sup>d</sup> Hoor, 1976 (ref. 91)

<sup>e</sup> Drobner *et al.*, 1992 (ref. 92)

<sup>f</sup> Strohm *et al.*, 2007 (ref. 94)

<sup>g</sup> Smith *et al.*, 1994 (ref. 93)
